# Supplementary material
Source: PubMed Central journal article supplement (PMC8939768)
Supplement: science.abm5835_sm.pdf [file science.abm5835_sm.pdf]

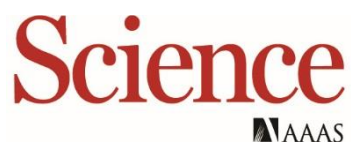

## Supplementary Materials for

### **SARS-CoV-2 Beta variant infection elicits potent lineage-specific and cross-reactive antibodies**

S. Momsen Reincke *et al.*

S. Momsen Reincke, momsens.reincke@charite.de; Harald Prüss, harald.pruess@charite.de (H.P.); Ian A. Wilson, wilson@scripps.edu (I.A.W.); Jakob Kreye, jakob.kreye@charite.de

DOI: 10.1126/science.abm5835

#### **The PDF file includes:**

Materials and Methods  
Figs. S1 to S6  
Tables S1 to S6  
References

#### **Other Supplementary Material for this manuscript includes the following:**

MDAR Reproducibility Checklist

## **Materials and Methods**

### **Patient recruitment**

All donors have given written informed consent and analyses were approved by the Institutional Review Board of Charité - Universitätsmedizin Berlin, corporate member of Freie Universität Berlin, Humboldt-Universität Berlin, and Berlin Institute of Health, Berlin (study protocol number EA1/258/18), the Institutional Review Board of the Faculty of Medicine at Ludwig-Maximilians-Universität (LMU) Munich, Germany (20-371), as well as the ethics committee of the Innsbruck Medical University (1167/2020). All donors in this study tested positive for SARS-CoV-2 infection by quantitative PCR with reverse transcription (RT-qPCR) from nasopharyngeal swabs. Beta variant infection was confirmed using next-generation sequencing of swab material from the donor or the unequivocal contact person in the chain of infection. All donors were unvaccinated. Patient characteristics are described in table S1.

### **Patient sample handling and single cell isolation**

Peripheral blood mononuclear cells (PBMCs) were isolated by gradient centrifugation and then enriched for B cells by negative selection using a pan-B-cell isolation kit according to the manufacturer's instructions (Miltenyi Biotec, 130-101-638).

His-tagged recombinant RBD Beta protein was produced in HEK cells (ACROBiosystems, SPD-C52Hp) and covalently labeled using CruzFluor488 (Santa Cruz Biotechnology, sc-362617) according to the manufacturer's instructions. Separately, the same protein was labeled using its His-tag by incubating the antigen with an Alexa Fluor 647-conjugated anti-His-antibody (R&D Systems, IC0501R) for 30 minutes at room temperature at a 2:1 ratio (RBD molecules:IgG

molecules). Ovalbumin (Sigma, A5503) was covalently labeled with PE-Cy7 (abcam, ab102903) according to the manufacturer's instructions.

Using fluorescence-activated cell sorting (FACS Aria II SORP, BD Biosciences), we then sorted single RBD-Beta-double-positive 7AAD<sup>-</sup>Ovalbumin<sup>-</sup>CD19<sup>+</sup>CD27<sup>+</sup> memory B cells (MBCs) into 96-well PCR plates. Staining was performed on ice for 25 minutes in PBS with 1 mM EDTA, 1:100 human IgG (1 mg/ml) as FcR block and 2 % FCS using the following staining reagents: 7-AAD 1:400 (Thermo Fisher Scientific), CD19-BV786 1:20 (clone SJ25C1, BD Biosciences, 563326), CD27-PE 1:5 (clone M-T271, BD Biosciences, 555441), Ovalbumin-PECy7 at 2 µg/ml, RBD-Beta-CruzFluor488 at 1 µg/ml (RBD concentration) and RBD-Beta/Anti-His-AF647 at 1 µg/ml (RBD concentration).

### **Recombinant mAb generation**

The mAbs were generated following our established protocols (19) with modifications as indicated. We used a nested PCR strategy to amplify the variable domains of the immunoglobulin heavy and light chain genes from single cell cDNA and analyzed their sequences with the aBASE module of Brain Antibody Sequence Evaluation (BASE) software (32). For further characterization representative mAbs were selected for cloning and expression based on the following criteria: (a) mAbs that are clonally expanded within one patient, (b) mAbs of clonotypes present in several patients in our dataset to decipher the shared antibody response to RBD Beta, (c) mAbs of clonotypes found both in our and CoV-AbDab datasets to potentially identify cross-reactive mAbs, (d) VH3-53/VH3-66 mAbs to elucidate the unexpected recurrent shared antibody response against RBD Beta, (e) mAbs of VH genes with strongest enrichment in our dataset, including VH4-39 and VH1-58 or (f) randomly selected mAbs of other germline genes and that appeared only once. The criteria-based selection for mAb

expression combined a focused investigation of mAb groups of special interest based on previous reports (e.g. VH3-53/VH3-66 mAbs) or on findings of this study (e.g. VH4-39 and VH1-58 mAbs) together with an unbiased investigation of randomly selected mAbs (category f), however, with the limitation of reducing the unbiased group of mAbs to ~30% of the expressed mAbs. The respective criteria for expression selection are listed in table S2 for each mAb individually. For mAbs selected for expression, pairs of functional Ig genes were PCR-amplified using specific primers with Q5 Polymerase (NEB). PCR-product and linearized vector containing the constant part of IgG1 heavy or kappa/lambda light chain sequences respectively were assembled using Gibson cloning with HiFi DNA Assembly Master Mix (NEB). All variable heavy chains were cloned into an IgG1 vector independent of the isotype of the source cells, where distribution was 70.8% IgG, 6.3% IgA and 22.9% IgM. Cloning was considered successful when sequence identity was >99.5% as verified by the cBASE module of BASE software. For mAb expression, human embryonic kidney cells (HEK293T) were transiently transfected with matching Ig heavy and light chains. The day after transfection, the supernatant was discarded and cells were supplemented with fresh medium. Six days later, mAb containing cell culture supernatant was harvested. Ig concentrations were determined and supernatants were used for reactivity and neutralization screening, if the Ig concentration was higher than 10 µg/ml. For biophysical characterization assays, supernatants were purified using Protein G Sepharose beads (GE Healthcare), dialyzed against PBS, and sterile-filtered using 0.2 µm filter units (GE Healthcare).

### **mAb sequence analysis, clonotype analysis and data visualization**

Sequence analysis, including gene usage, CDR3 length, and number of somatic hypermutations, was performed using our previously published script collection BASE (32). To identify



antibodies which share the same V and J genes on both Ig heavy and light chains and thus are considered to be one clonotype, we used an in-house R script. After identification of public clonotypes, they were plotted in a Circos plot using the R package *circize* (33). Our newly acquired dataset was compared to all previously published RBD mAbs included in the CoV-AbDab database, retrieved on 2021-06-16. As the CoV-AbDab includes SARS-CoV-2 mAbs from other sources than humans, and against other epitopes than the RBD, the following selection criteria were used (nomenclature like in CoV-AbDab): binds to: SARS-CoV-2, Protein + Epitope: RBD, Origin: B-cells (human). 1157 mAbs fulfilled these criteria as human RBD mAbs, none of which were derived from studies of patients where infection with a VOC was reported. All 1037 mAbs for which information on V-J gene usage was available for both heavy and light chain were included in the clonotype analysis and VH gene usage analysis in Fig. 2.

### **Diagnostic antibody testing**

Initial serological testing of patient samples was performed using a solid phase immunoassay (SeraSpot®Anti-SARS-CoV-2 IgG, Seramun Diagnostica GmbH, Heidesee, Germany). Briefly, on the bottom of each well, SARS-CoV-2 recombinant antigens (nucleocapsid, wildtype full spike, wildtype S1 domain, wildtype RBD) and controls are printed in an array format as spots. Serum samples were diluted 1:101 in sample dilution buffer, added to the wells, and incubated for 30 minutes at room temperature. After washing, bound antibodies were detected by incubation with horseradish peroxidase (HRP)-labeled anti-human IgG for 30 minutes at room temperature. After washing again, 3',5,5-tetramethylbenzidine (TMB) solution was added to each well and incubated in the dark for 30 minutes at room temperature. Subsequently, the solution was removed, and color intensity of immune complexes formed at the site of each antigen spot was measured using a SpotSight®plate scanner. Color intensity correlates to the

antibody concentration and results were calculated as signal-to-cutoff ratios using the internal cutoff control.

Second, the presence of SARS-CoV-2 S1-specific antibodies was analyzed using a commercially available anti-SARS-CoV-2-S1 IgG ELISA (EUROIMMUN Medizinische Labordiagnostika AG, Lübeck, Germany) according to the manufacturer's instructions. Serum samples were diluted 1:101. The optical density (OD) at 450nm was measured and OD ratios were calculated by dividing this value by the OD of the kit-included calibrator.

Additionally, we applied a modified solid phase immunoassay (Seramun Diagnostica GmbH, Heidese, Germany) as described above, which additionally contained SARS-CoV-2 RBD-VOCs (InVivo BioTech Services GmbH, Hennigsdorf, Germany).

#### **Surrogate virus neutralization test (ACE2 binding inhibition)**

Neutralizing capacity of patients' sera was assessed by a surrogate virus neutralization test (cPass Assay, Medac, Wedel, Germany) according to the manufacturer's instructions and as described previously (34). Similarly, inhibition of ACE2 interaction of mAbs was tested using cell culture supernatants containing 10 µg/ml IgG. Briefly, serum samples or mAbs, positive and negative controls were diluted 1:10 with sample dilution buffer, mixed 1:1 with wildtype HRP-RBD or Beta HRP-RBD (Medac, Wedel, Germany) solution and incubated at 37°C for 30 minutes. Afterwards, the mixture was added to the hACE2-coated plate and incubated at 37°C for 15 minutes. After a washing step, TMB solution was added, and the plate was incubated in the dark at room temperature for 15 minutes. Stop solution was then added and the optical density at 450 nm was measured using a Tecan Infinite 200 PRO plate reader. For calculation of the relative inhibition of ACE2/RBD binding, the following formula was applied: Inhibition score (%) =  $(1 - \text{OD value sample} / \text{OD value negative control}) \times 100\%$ .

## **RBD ELISA**

Binding of mAbs to SARS-CoV-2 spike RBD or variants thereof was detected by ELISA as previously described (19). Briefly, HEK293T cell-secreted RBD-Fc fusion proteins composed of the RBD-SD1 component of the SARS-CoV-2 spike S1 subunit (amino acids 319-591) and the constant region of rabbit IgG1 heavy chain (Fc) were immobilized onto 96-well plates via anti-rabbit IgG (Dianova, 711-005-152). Human mAbs were applied and detected using HRP-conjugated anti-human IgG (Dianova, 709-035-149) and the HRP substrate 1-step Ultra TMB (Thermo Fisher Scientific, Waltham, MA).

All mAbs were initially screened at 10 ng/ml for binding to RBD Beta and wildtype RBD to identify strong binders and to distinguish Beta-selective from cross-reactive antibodies. RBD Beta-selective mAbs were tested at 100 ng/ml for binding to RBD Beta, wildtype RBD as well as RBD variants containing all other combinations of amino-acid differences at positions 417 (N or K), 484 (K or E) and 501 (Y or N). Cross-reactive mAbs that neutralized SARS-CoV-2 Beta were tested at 100 ng/ml for binding to RBD-Fc proteins derived from SARS-CoV-2 variants of concern (VOCs) Alpha (lineage B.1.1.7; RBD N501Y and SD1 A570D), Beta (B.1.351; RBD K417N, E484K and N501Y), Gamma (P.1; RBD K417T, E484K and N501Y) and Delta (B.1.617.2; RBD L452R and T478K) (35, 36); from SARS-CoV-2 wildtype; and from SARS-CoV (19). For each mAb, the absorbance values at 450 nm based on binding to the RBD variants were normalized to its value on RBD Beta. Means of the relative values were determined from data of at least two independent experiments.

RBD Alpha and RBD Beta were generated based on gene synthesis of the S1 RBD-SD1 regions (Eurofins Genomics). Mutations for single amino-acid changes and for RBD Gamma and RBD

Delta were introduced by overlap extension PCR. All constructs were checked by Sanger sequencing (LGC Genomics).

### **Plaque reduction neutralization test**

To assess the neutralizing activity of serum samples and SARS-CoV-2 mAbs, we performed plaque reduction neutralization tests (PRNT) as described (37) using virus of Beta isolate (GISAID accession no: EPI\_ISL\_862149), wildtype Munich isolate 984 (37) and Delta isolate (GISAID accession no EPI\_ISL\_2500366). In brief, Vero E6 cells ( $1.6 \times 10^5$  cells/well) were seeded in 24-well plates and incubated overnight. Serum or mAbs were diluted in OptiPro and mixed 1:1 with 200  $\mu$ L of the respective virus isolate solution containing 100 plaque forming units. The serum- or mAb-virus solutions were incubated on the Vero E6 cells for 1 hour at 37°C, then discarded, and cells were washed once with PBS and supplemented with 1.2% Avicel solution in DMEM. After three days of incubation, the supernatants were removed, the cells were fixed and inactivated using a 6% formaldehyde in PBS solution and then stained with crystal violet to count plaques. mAbs were diluted to 200 and 2000 ng/ml in mAb-virus solution for screening assays and in further dilutions for the determination of the IC<sub>50</sub>. Serum samples were serially diluted starting at 1:20. All dilutions were tested in duplicate.

### **Surface plasmon resonance**

Anti-human IgG (Fc) capture antibody was covalently immobilized on a C1 sensor chip. Purified mAbs were reversibly immobilized via the anti-human IgG capture surface. The RBD Beta protein (Acro Biosystems, SPD-C52Hp) was injected at different concentrations in a buffer consisting of 10 mM HEPES pH 7.4, 150 mM NaCl, 3 mM EDTA, 0.05% Tween 20, 0.1 mg/ml

BSA.  $K_a$ ,  $K_d$  and  $K_D$ -values were determined using a monovalent analyte model. Recordings were performed on a Biacore T200 instrument at 25°C.

### **Crystallization and structural determination**

The RBD (residues 333-529) of the SARS-CoV-2 spike (S) protein (GenBank: QHD43416.1) and the Beta variant that carries three mutations on the RBD (K417N, E484K, and N501Y) were cloned into a customized pFastBac vector (38), and fused with an N-terminal gp67 signal peptide and C-terminal His<sub>6</sub> tag. A recombinant bacmid DNA was generated using the Bac-to-Bac system (Life Technologies). Baculovirus was generated by transfecting purified bacmid DNA into Sf9 cells using FuGENE HD (Promega), and subsequently used to infect suspension cultures of High Five cells (Life Technologies) at an MOI of 5 to 10. Infected High Five cells were incubated at 28 °C with shaking at 110 r.p.m. for 72 h for protein expression. The supernatant was then concentrated using a 10 kDa MW cutoff Centrimate cassette (Pall Corporation). The RBD protein was purified by Ni-NTA, followed by size exclusion chromatography, and buffer exchanged into 20 mM Tris-HCl pH 7.4 and 150 mM NaCl.

For expression and purification of the Fabs, heavy and light chains were cloned into pHCMV3. The plasmids were transiently co-transfected into ExpiCHO cells at a ratio of 2:1 (HC:LC) using ExpiFectamine™ CHO Reagent (Thermo Fisher Scientific) according to the manufacturer's instructions. The supernatant was collected at 14 days post-transfection. The Fabs were purified with a CaptureSelect™ CH1-XL Affinity Matrix (Thermo Fisher Scientific) followed by size exclusion chromatography.

CS23/B.1.351 RBD, CS44/COVA1-16/B.1.351 RBD, and CV07-287/COVA1-16/wild-type RBD complexes were formed by mixing each of the protein components at an equimolar ratio and incubated overnight at 4°C. COVA1-16 Fab was used to assist with the crystal packing (39).

Each complex was screened for crystallization using the 384 conditions of the JCSG Core Suite (Qiagen) and ProPlex screen (Molecular Dimensions) on either our robotic CrystalMation system (Rigaku) or an Oryx8 (Douglas Instruments) at Scripps Research. Crystallization trials were set-up by the vapor diffusion method in sitting drops containing 0.1  $\mu$ l of protein and 0.1  $\mu$ l of reservoir solution. Diffraction-quality crystals were obtained in the following conditions:

CS23/B.1.351 RBD (12.5 mg/ml): 1.6 M ammonium sulfate and 0.1 M bicine pH 9.0 at 20°C

CS44/COVA1-16/B.1.351 RBD (12.0 mg/ml): 1.6 M ammonium sulfate and 0.1 M citric acid pH 4.0 at 20°C

CV07-287/COVA1-16/wild-type RBD (12.0 mg/ml): 1.6 M ammonium sulfate and 0.1 M bicine pH 9.0 at 20°C

All crystals appeared on day 3 and were harvested on day 7. Before flash cooling in liquid nitrogen for X-ray diffraction studies, crystals were equilibrated in reservoir solution supplemented the following cryoprotectants:

CS23/B.1.351 RBD: 20% ethylene glycol

CS44/COVA1-16/B.1.351 RBD: 20% glycerol

CV07-287/COVA1-16/wild-type RBD: 20% ethylene glycol

Diffraction data were collected at cryogenic temperature (100 K) at the Advanced Light Source on the beamline 5.0.1 and the Stanford Synchrotron Radiation Lightsource (SSRL) on Scripps/Stanford beamline 12-1, and processed with HKL2000 (40) (table S4). Structures were solved by molecular replacement using PHASER (41) with PDB 6W41. Iterative model building and refinement were carried out in COOT (42) and PHENIX (43), respectively (table S4).

Epitope and paratope residues, as well as their interactions, were identified by accessing PISA at the European Bioinformatics Institute ([http://www.ebi.ac.uk/pdbe/prot\\_int/pistart.html](http://www.ebi.ac.uk/pdbe/prot_int/pistart.html)) (44) (table S5).

### **Biolayer interferometry (BLI) competition assay**

Competition assays were performed by biolayer interferometry (BLI) using an Octet Red instrument (FortéBio). IgGs were diluted with kinetic buffer (1x PBS, pH 7.4, 0.01% BSA and 0.002% Tween 20). After His-tagged RBD Beta was immobilized on anti-Penta His BLI sensors, sensors were first dipped into indicated “first antibodies” (50 µg/ml), and then dipped into indicated “second antibodies” (12.5 µg/ml). Three replicates were performed for each BLI experiment. The response signals each of the bound first antibodies were normalized to 100%, and the additional signals of the secondary antibodies were calculated accordingly. Numbers > 20% indicate different binding sites.

### **BLI binding assay to VOC RBDs**

RBD proteins for the biolayer interferometry (BLI) binding assay were expressed in human cells. RBDs were cloned into pCMV3 vector and fused with a C-terminal His<sub>6</sub> tag. The plasmids were transiently transfected into Expi293F cells using ExpiFectamine 293 Reagent (Thermo Fisher Scientific) according to the manufacturer’s instructions. The supernatant was collected at 7 days post-transfection. The His<sub>6</sub>-tagged proteins were then purified with Ni Sepharose Excel resin (Cytiva) followed by size exclusion chromatography. The Omicron RBD was purchased from AcroBiosystems Inc. To measure the binding kinetics of anti-SARS-CoV-2 IgGs and RBDs, the IgGs were diluted with kinetic buffer (1x PBS, pH 7.4, 0.01% BSA and 0.002%

Tween 20) into 15  $\mu\text{g/ml}$ . The IgGs were then loaded onto anti-human IgG Fc (AHC) biosensors and interacted with 5-fold gradient dilutions of 500 nM to 4 nM of SARS-CoV-2 RBDs. The assay went through the following steps. 1) baseline: 1 min with 1x kinetic buffer; 2) loading: 90 seconds with IgGs; 3) wash: 15 seconds wash of unbound IgGs with 1x kinetic buffer; 4) baseline: 1 min with 1x kinetic buffer; 5) association: 90 seconds with RBDs; and 6) dissociation: 90 seconds with 1x kinetic buffer. For estimating KD, a 1:1 binding model was used.

### **Statistical analyses**

Area under the curve (AUC) calculations in Fig. 1 and all statistical analyses were performed using GraphPad Prism (9.2.0).



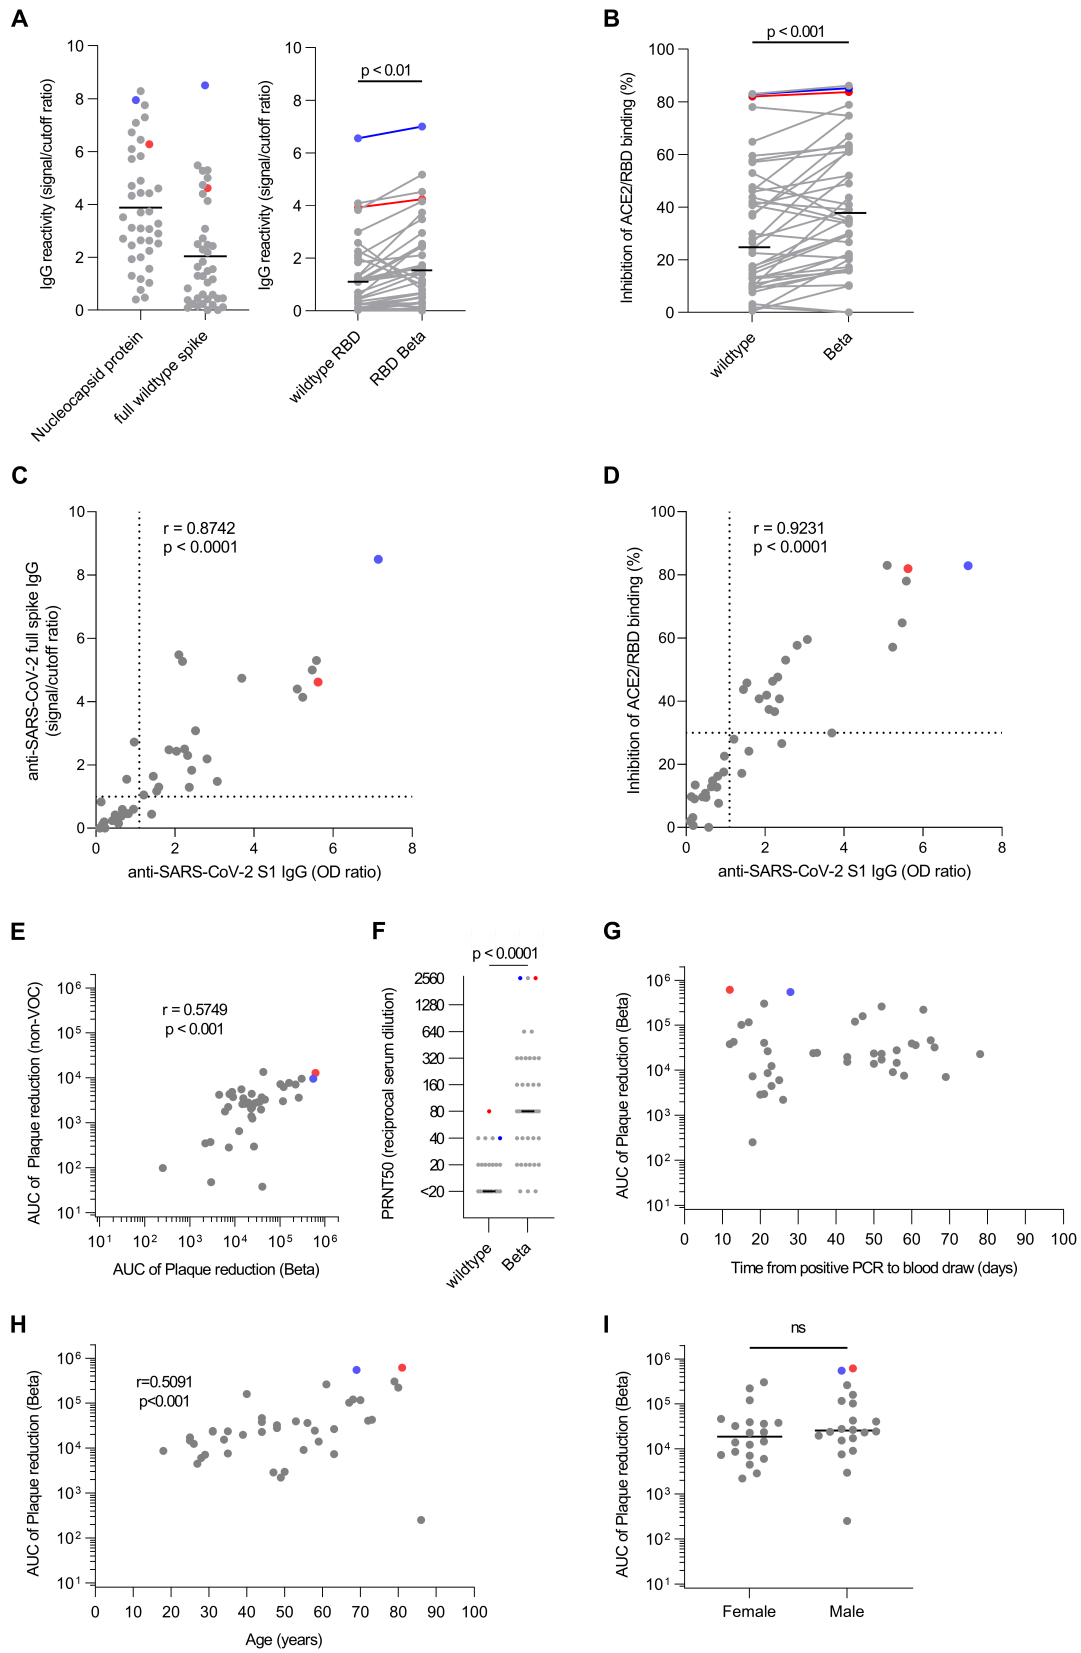

**Fig. S1. Polyclonal antibodies from individuals after infection with SARS-CoV-2 Beta.** (A) IgG reactivity against indicated antigens was measured by SeraSpot Anti-SARS-CoV-2 IgG assay. Statistical analysis was performed using a Friedman test and Dunn's multiple comparison test. Only the p-value for comparison of wildtype RBD vs. RBD Beta is shown. Horizontal bars indicate median values. (B) ACE2 interaction with indicated RBD was determined using the cPass Surrogate Neutralization Assay. Statistical analysis was performed using a Wilcoxon matched-pairs signed rank test. Horizontal bars indicate median values. Values below zero were set to zero, indicating no inhibition. (C-D) Anti-SARS-CoV-2 S1 IgG measured by Euroimmun S1-ELISA is plotted against (C) anti-SARS-CoV-2 full wildtype spike IgG measured by SeraSpot IgG assay and against (D) inhibition of ACE2/wildtype RBD binding measured by cPass Surrogate Neutralization assay. Statistical analysis was performed by two-tailed Spearman's correlation. Dashed lines indicate cutoffs defined by the assays' manufacturers, which have been validated for wildtype sera. (E) Correlation of neutralization activity against SARS-CoV-2 Beta and SARS-CoV-2 wildtype measured as AUC of PRNT is shown. Statistical analysis was performed by two-tailed Spearman's correlations. (F) The 50% serum neutralization titers (PRNT50) against indicated authentic virus is shown (from PRNT curves shown in Fig. 1, A and B). Statistical analysis was performed using a Wilcoxon matched-pairs signed rank test. Horizontal bars indicate median. (G) Time between first positive PCR test and sample collection in days is plotted against the AUC of PRNT against SARS-CoV-2 Beta. Statistical analysis performed by two-tailed Spearman's correlations showed no statistically significant correlation. (H) Patient age is plotted against AUC of PRNT against SARS-CoV-2 Beta. Statistical analysis was performed by two-tailed Spearman's correlations. (I) AUC of PRNT is plotted against SARS-CoV-2 Beta for men (n = 20) and women (n = 20) Statistical significance was determined using two-tailed Mann-Whitney U-tests. (E, G-H) AUC calculation is based on authentic virus PRNT curves (shown in Fig. 1, A and B). Patients SA1 and SA2 mounted the strongest antibody response, which are highlighted in red and blue, respectively.

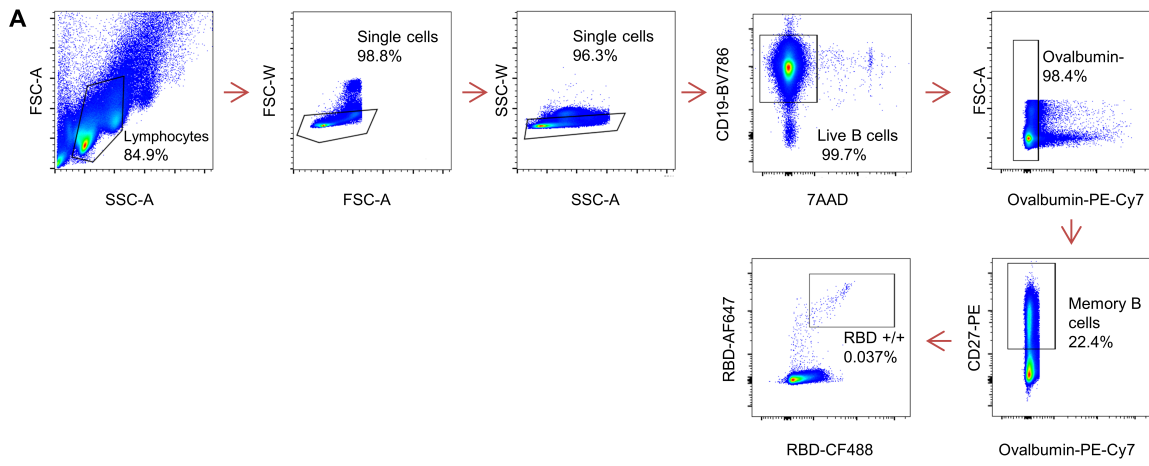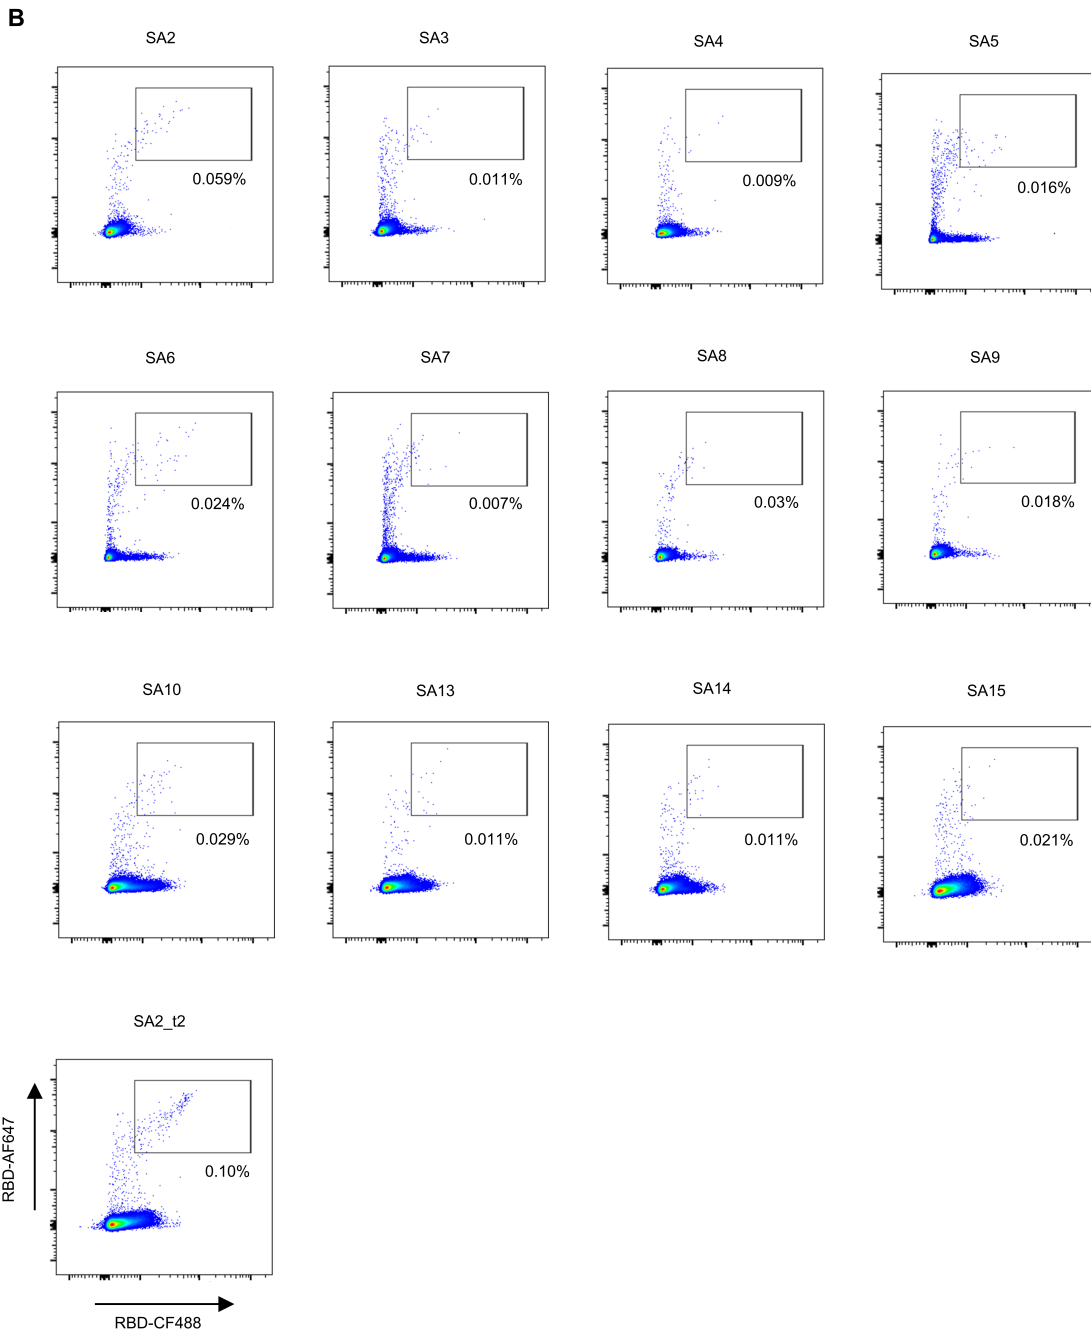

**Fig. S2. Gating strategy used for single cell sorting of RBD-reactive memory B cells.** (A) Gating was on singlets that were CD19<sup>+</sup>7AAD<sup>-</sup>Ovalbumin<sup>-</sup>CD27<sup>+</sup>. Sorted cells were RBD-AF647<sup>+</sup>/RBD-CF488<sup>+</sup>. (B) Flow cytometry showing the percentage of RBD-double-positive memory B cells of indicated patients. Patient SA2 donated blood twice, and the analysis from the second time point is denoted by SA2\_t2.

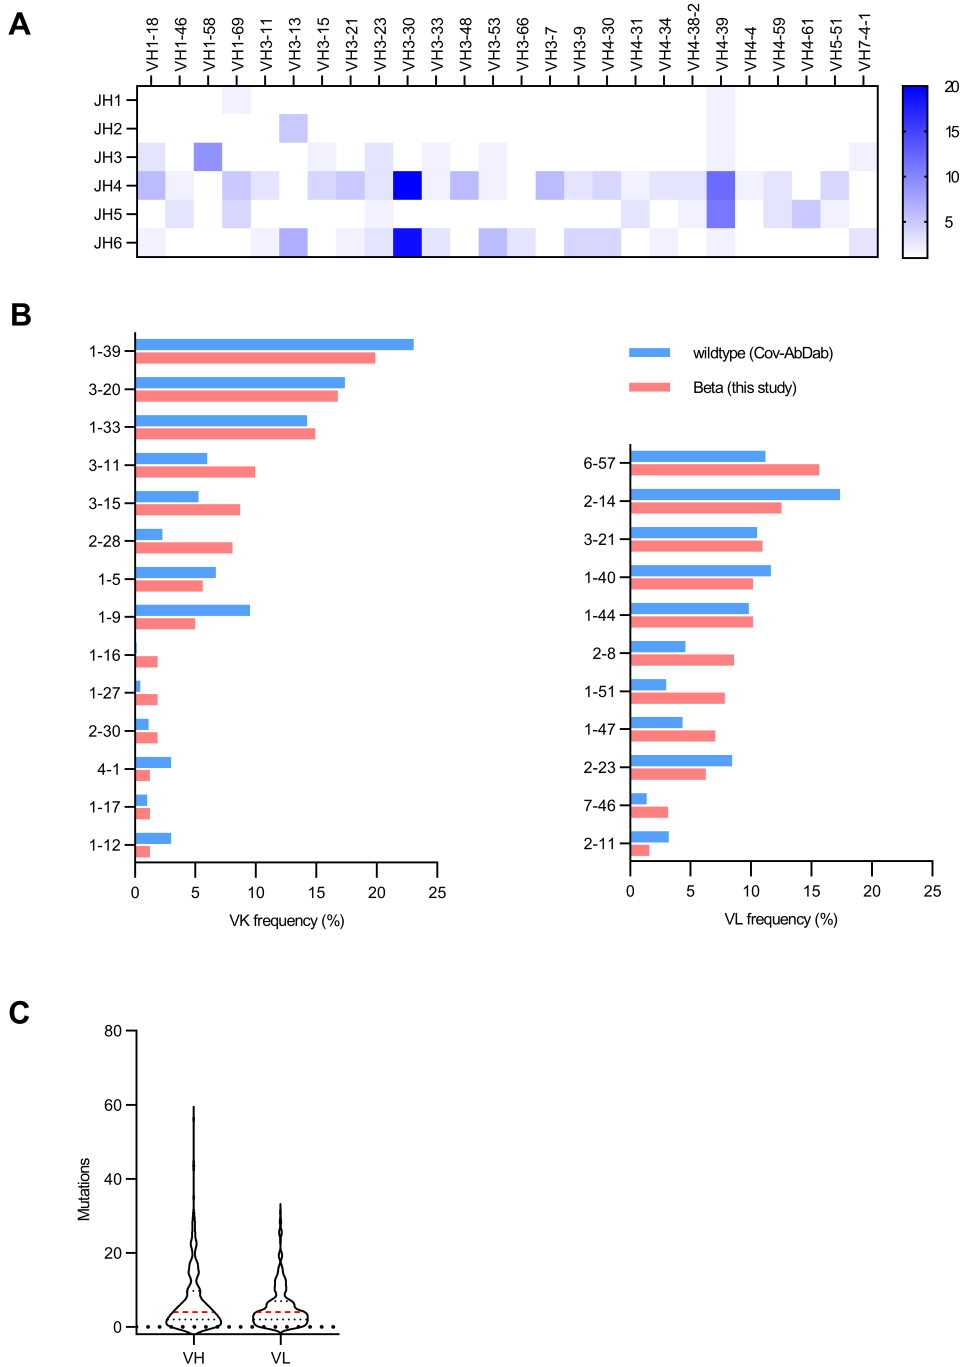

**Fig. S3. Sequence characteristics of Beta-elicited monoclonal antibodies in this study. (A)** Pairing of indicated VH genes with JH gene families of 289 IgG mAbs are shown in absolute numbers. Only VH genes with 4 or more occurrences are shown. **(B)** VK and VL gene usage of 289 RBD Beta IgG mAbs from this study (red) is compared to 1037 wildtype RBD mAbs from 96 previously published studies

(blue, CoV-AbDab). Frequencies of mAbs encoded by each VK/VL gene are shown as bars. Genes are ordered by frequency in CoV-AbDab. (C) Violin plots of somatic nucleotide mutations in the IGVH and IGVL genes in all 289 IgG mAbs obtained from all donors. Red bars indicate mean.

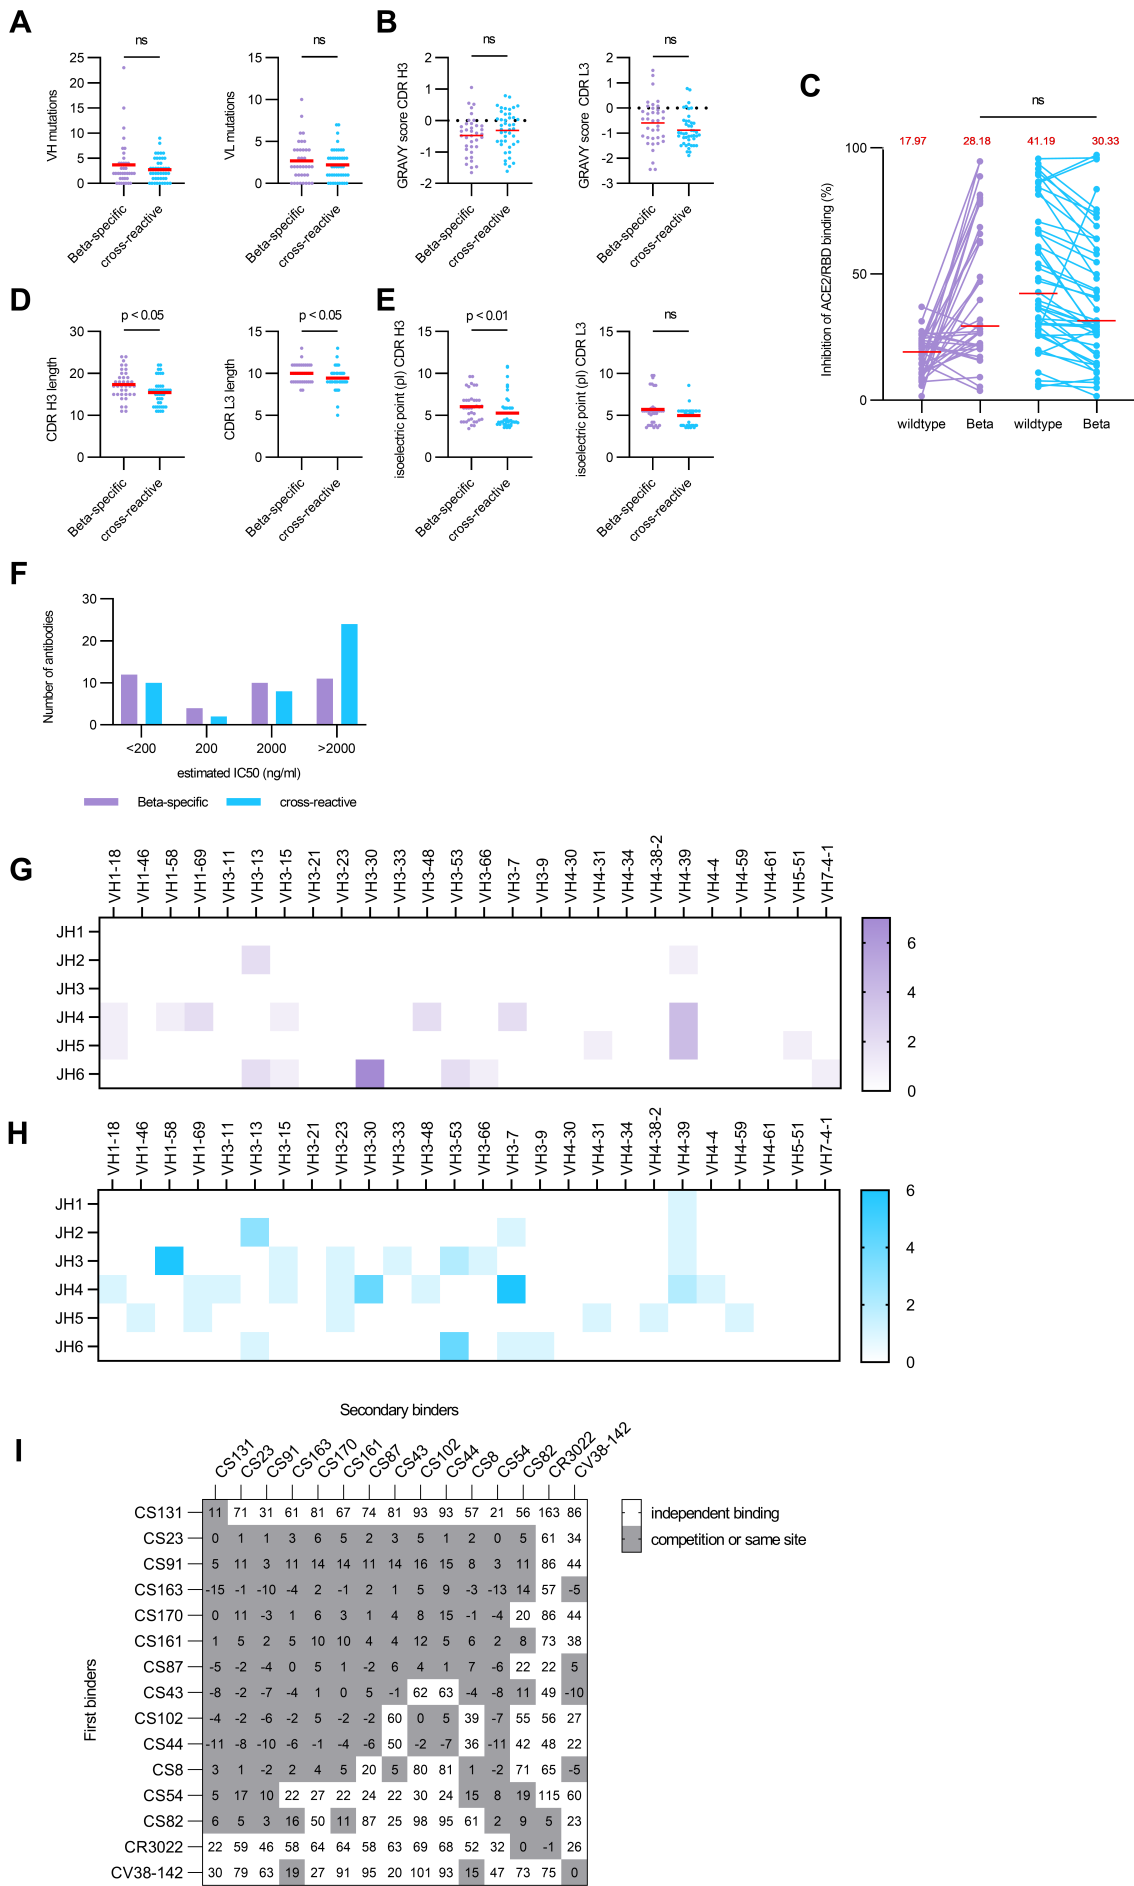

**Fig. S4. Comparison between cross-reactive and Beta-specific antibodies of this study.** All 44 cross-reactive and 37 Beta-specific mAbs that strongly bound the RBD were included in this comparison. **(A)** Number of somatic nucleotide mutations in the IGVH (left) and IGVL (right) genes. Statistical significance was determined using a two-tailed Mann–Whitney U-tests. **(B)** GRAVY score as a measure of hydrophobicity of CDR H3 (left) and CDR L3 (right) regions was calculated using [https://www.bioinformatics.org/sms2/protein\\_gravy.html](https://www.bioinformatics.org/sms2/protein_gravy.html). Statistical significance was determined using an unpaired t-test, and a Shapiro–Wilk test was used to test for normality. **(C)** ACE2 interaction with indicated RBD was determined using the cPass Surrogate Neutralization Assay. Statistical analysis was performed using a two-tailed Mann–Whitney U-test. Median values are given in red. **(D)** Length of heavy chain (left) or light chain (right) CDR3 regions. Statistical significance was determined using a two-tailed Mann–Whitney U-test. **(E)** Isoelectric point of CDR H3 (left) and CDR L3 (right) regions was calculated using the pI/Mw tool at [https://web.expasy.org/compute\\_pi/](https://web.expasy.org/compute_pi/). **(A-B)** and **(D-E)** Red bars indicate mean. **(F)** Estimated IC50 in PRNT against Beta isolate is shown for cross-reactive and Beta-specific antibodies. **(G-H)** Pairing of indicated VH genes with JH gene families of all 81 expressed mAbs with strong binding to the RBD Beta with **(G)** showing pairings of 37 Beta-specific antibodies in purple **(H)** showing pairings of 44 cross-reactive antibodies in light blue. **(I)** Competition of mAbs was determined using a biolayer interferometry assay. Shown are additional signals of the secondary antibodies in percent after normalization of the response signals of the indicated bound first antibodies. Positive numbers >20% indicate different binding sites, numbers smaller than 20% suggest competition or same sites.



**A**

| mAb                     |         | Heavy Chain |         |                       |      |    |        | Light Chain |  |
|-------------------------|---------|-------------|---------|-----------------------|------|----|--------|-------------|--|
| ID                      | patient | CDR H1      | CDR H2  | CDR H3                | DH   | JH | VK/VL  | JK/JL       |  |
| VH4-39 GL               |         | GGSISSSSYY  | IYYSGST | AR                    |      |    |        |             |  |
| <i>501Y-dependent</i>   |         |             |         |                       |      |    |        |             |  |
| CS8                     | SA2     |             |         | HEGSTPLMV---KNYFDY    | 3-10 | 4  | K1D-12 | K5          |  |
| CS24                    | SA5     |             |         | QFWTRPPS-----VWFDP    | 3-3  | 5  | L1-51  | L3          |  |
| CS27                    | SA5     |             |         | GIAARPGD-----WHFDL    | 6-6  | 2  | L1-51  | L3          |  |
| CS37                    | SA5     |             |         | HVGPIYSGYDK---NNWFDP  | 5-12 | 5  | K3-11  | K4          |  |
| CS40                    | SA5     |             |         | HAAPRPGD-----SWFDP    | 6-6  | 5  | K1-12  | K5          |  |
| CS41                    | SA5     |             | H       | HAGPYSSWI---ANWFDP    | 6-13 | 5  | K1-9   | K4          |  |
| CS43                    | SA5     |             |         | RLGPRGPFDPNH---GNHFDY | 1-14 | 4  | K1-9   | K1          |  |
| CS163                   | SA10    |             | R       | QVAWLPRD-----DYFDY    | 6-19 | 4  | L2-8   | L2          |  |
| CS170                   | SA2     |             |         | EVAPIKQW--L--VSYFDY   | 6-19 | 4  | L1-40  | L3          |  |
| <i>cross-reactive</i>   |         |             |         |                       |      |    |        |             |  |
| CS30                    | SA5     | D           |         | RGWLRGYF-----DL       | 3-22 | 2  | L6-57  | L2          |  |
| CS31                    | SA6     |             | F       | TQLWLRSNF-----DS      | 5-12 | 4  | L6-57  | L2          |  |
| CS45                    | SA8     |             |         | QSSPKLGD-----DAFDI    | 3-10 | 3  | L1-51  | L2          |  |
| CS124                   | SA7     |             | H       | HTGYDSSGYR-LEYFQH     | 3-22 | 1  | K1-33  | K4          |  |
| CS167                   | SA2     |             |         | FTPFAGL-----YYFDY     | 2-15 | 4  | L2-8   | L2          |  |
| <i>non-RBD-reactive</i> |         |             |         |                       |      |    |        |             |  |
| CS97                    | SA4     | N N         | D       | VNSRDGHSYASGGHEDFPQ   | 3-10 | 1  | L3-27  | L3          |  |
| CS104                   | SA4     | N           | V    R  | VTYSS---GW-----DNEDY  | 6-19 | 4  | K3-20  | K1          |  |

**B**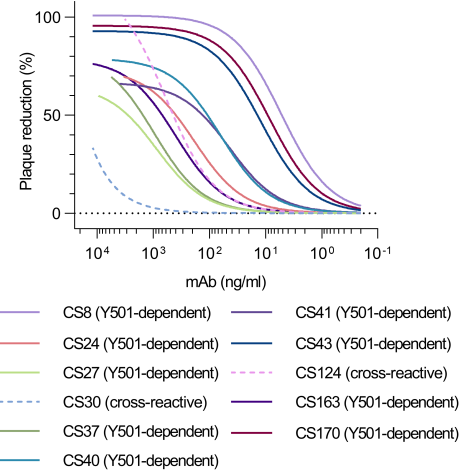**C**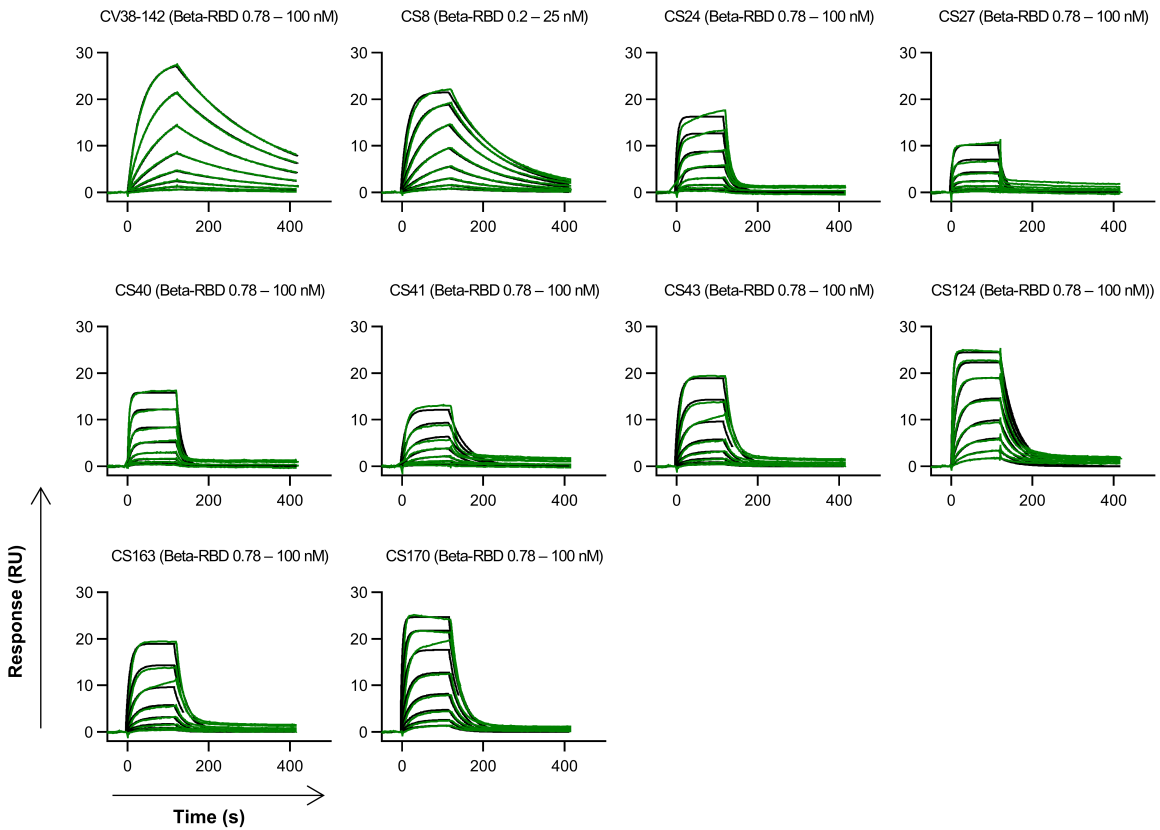**D**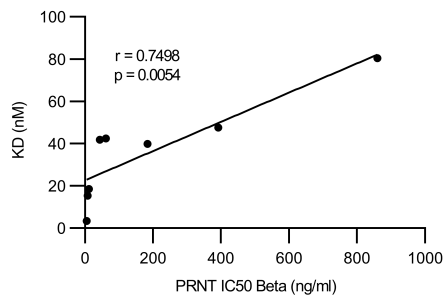

**Fig. S5. Neutralization and binding kinetics of Beta-specific VH4-39 antibodies from multiple patients infected with SARS-CoV-2 Beta.** (A) Comparison of sequence features of all expressed VH4-39 mAbs in this study. All antibodies which were expressed are shown in this panel. (B) Fitted curves of VH4-39 mAbs show dose-dependent neutralization against authentic SARS-CoV-2 Beta variant virus. (C) Binding kinetics of Beta-RBD to indicated mAbs were modeled (black) from multi-cycle surface plasmon resonance (SPR) measurements (green). The fitted monovalent analyte model is shown. For CS24, CS27 and CS41, there was a second phase after the fast dissociation impeding the quality of the monovalent analyte model. All measurements are performed using serial 2-fold dilutions of SARS-CoV-2 Beta-RBD-His on immobilized mAbs. (D) Correlation of neutralization and affinity of monoclonal VH4-39 Y501-specific antibodies. IC50 was determined from neutralization curves shown in (B). Affinity of monoclonal antibodies to Beta RBD was determined by the fitted analyte model shown in (A). Statistical analysis was performed by a simple linear regression.

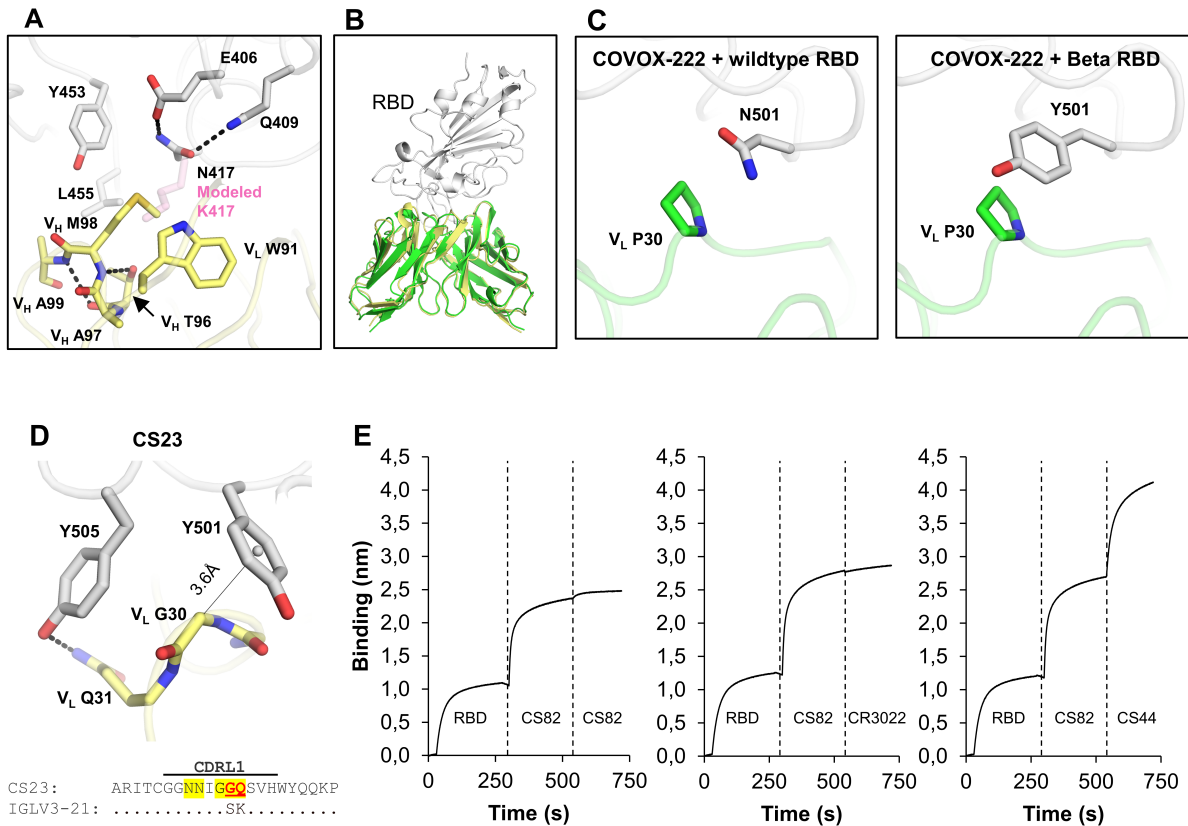

**Fig. S6. Structural and binding analysis of VH3-53 mAbs that bind to Beta RBD.** The RBD is shown in white. Hydrogen bonds are represented by black dashed lines. **(A)** Structure of the CDR H3 of CS23 (yellow). A modeled side chain of K417 is shown as transparent pink sticks, which would be unfavorable for binding to CS23, where VH M98 occupies this pocket. **(B)** COVOX-222 and CS23 adopt the same binding mode. The crystal structure of COVOX-222 (green) in complex with RBD (Beta) was superimposed onto the structure of CS23 (yellow) in complex with RBD (Beta). Only the variable domains of the antibodies are shown for clarity. **(C)** Structures of COVOX-222 (green) in complex with wildtype RBD (left, PDB 7NX6) and Beta RBD (right, PDB 7NXA). VL P30 and Y501 in the Beta RBD forms a  $\pi$ - $\pi$  interaction. **(D)** CDR L1 of CS23 (yellow) interacts with the Beta RBD (white). Hydrogen bonds are represented by black dashed lines. The distance between VL G30-C $\alpha$  and the benzene ring center of RBD-Y501 (white sphere) is represented by a thin black solid line. Sequence alignment between the light chain of CS23 and its germline sequence is shown at the bottom, where identical residues are

represented by dots. Paratope residues (defined as buried surface area  $> 0 \text{ \AA}^2$ ) are highlighted in yellow, and somatically mutated residues shown in red letters. **(E)** Biolayer interferometry competition assay between antibodies. The biosensor was first loaded with SARS-CoV-2 RBD, followed by two binding events: 1) CS82 IgG; 2) CS82, CR3022, or CS44 IgGs. Representative results of three replicates for each experiment are shown.

**Table S1. Clinical characteristics and neutralization of serum by patients included in this study.**

| Patient             | Sex | Age | Date of first positive PCR test | Days from positive PCR to blood draw | Symptoms | Hospitalization | AUC PRNT Beta | AUC PRNT wildtype (Munich isolate) | ACE2/RBD inhibition wildtype (percent) <sup>a</sup> | ACE2/RBD inhibition Beta (percent) <sup>a</sup> |
|---------------------|-----|-----|---------------------------------|--------------------------------------|----------|-----------------|---------------|------------------------------------|-----------------------------------------------------|-------------------------------------------------|
| SA1                 | m   | 81  | 22.01.2021                      | 12                                   | yes      | yes             | 614037        | 12807                              | 82.0                                                | 83.7                                            |
| SA2                 | m   | 69  | 27.01.2021                      | 28                                   | yes      | yes             | 547486        | 9557                               | 82.9                                                | 85.2                                            |
| SA2_t2 <sup>b</sup> | m   | 69  | 27.01.2021                      | 50                                   | yes      | yes             | 396551        | 4861                               | 79,18                                               | 83,78                                           |
| SA3                 | f   | 49  | 29.01.2021                      | 26                                   | yes      | no              | 2210          | 351,1                              | 7.65                                                | 16.4                                            |
| SA4                 | f   | 18  | 02.02.2021                      | 22                                   | yes      | no              | 8601          | 4879                               | 47.6                                                | 40.9                                            |
| SA5                 | f   | 27  | 03.02.2021                      | 23                                   | yes      | no              | 4466          | 4173                               | 53.0                                                | 35.3                                            |
| SA6                 | f   | 28  | 01.02.2021                      | 25                                   | yes      | no              | 6061          | 1794                               | 40.7                                                | 33.7                                            |
| SA7                 | f   | 26  | 03.02.2021                      | 23                                   | yes      | no              | 12492         | 654,1                              | 16.2                                                | 30.0                                            |
| SA8                 | m   | 63  | 04.02.2021                      | 22                                   | yes      | no              | 26705         | 296,6                              | 9.7                                                 | 10.3                                            |
| SA9                 | f   | 63  | 08.02.2021                      | 18                                   | yes      | no              | 7399          | 281,2                              | 9.0                                                 | 16.0                                            |
| SA10                | m   | 67  | 22.02.2021                      | 15                                   | yes      | no              | 101879        | 7195                               | 78.1                                                | 74.8                                            |
| SA11                | m   | 72  | 16.02.2021                      | 21                                   | no       | no              | 41076         | 38                                 | 9.5                                                 | 22.2                                            |
| SA12                | m   | 86  | 19.02.2021                      | 18                                   | yes      | no              | 250           | 98,8                               | 0.6                                                 | 10.1                                            |
| SA13                | f   | 79  | 16.02.2021                      | 21                                   | yes      | no              | 304474        | 9535                               | 59.5                                                | 62.9                                            |
| SA14                | m   | 50  | 16.02.2021                      | 21                                   | yes      | no              | 2982          | 47,5                               | 13.4                                                | 17.2                                            |
| SA15                | f   | 47  | 17.02.2021                      | 20                                   | yes      | no              | 2879          | 372,7                              | 3.1                                                 | 0                                               |
| SA17                | f   | 68  | 18.01.2021                      | 45                                   | yes      | yes             | 119883        | 6225                               | 46.3                                                | 74.5                                            |
| SA19                | m   | 70  | 16.02.2021                      | 17                                   | yes      | yes             | 117433        | 3033                               | 57.1                                                | 61.0                                            |
| SA20                | f   | 44  | 24.02.2021                      | 12                                   | yes      | yes             | 38354         | 1959                               | 29.9                                                | 26.7                                            |
| SA21                | f   | 59  | 19.01.2021                      | 50                                   | no       | no              | 13887         | 5602                               | 37.4                                                | 60.9                                            |
| SA23                | f   | 35  | 19.01.2021                      | 50                                   | yes      | no              | 23737         | 4387                               | 17.2                                                | 35.7                                            |
| SA24                | f   | 44  | 04.01.2021                      | 65                                   | yes      | no              | 46577         | 3262                               | 57.7                                                | 63.7                                            |
| SA25                | m   | 39  | 26.01.2021                      | 43                                   | yes      | no              | 19655         | 2838                               | 12.9                                                | 15.3                                            |
| SA26                | m   | 58  | 03.02.2021                      | 35                                   | yes      | no              | 24506         | 1246                               | 40.7                                                | 49.0                                            |
| SA27                | m   | 34  | 26.01.2021                      | 43                                   | yes      | no              | 15453         | 3490                               | 22.8                                                | 20.6                                            |
| SA28                | m   | 61  | 17.01.2021                      | 52                                   | yes      | yes             | 263808        | 3634                               | 64.8                                                | 78.9                                            |
| SA29                | m   | 55  | 14.01.2021                      | 55                                   | yes      | no              | 9084          | 3722                               | 2.0                                                 | 0                                               |
| SA30                | f   | 29  | 31.12.2020                      | 69                                   | yes      | no              | 7079          | 2242                               | 0                                                   | 20.2                                            |
| SA31                | m   | 40  | 23.01.2021                      | 47                                   | no       | no              | 160344        | 7747                               | 83.0                                                | 86.1                                            |
| SA32                | f   | 80  | 07.01.2021                      | 63                                   | yes      | yes             | 223456        | 7066                               | 45.8                                                | 52.0                                            |
| SA33                | f   | 25  | 14.01.2021                      | 56                                   | no       | no              | 14762         | 2588                               | 10.8                                                | 16.4                                            |
| SA34                | f   | 56  | 09.01.2021                      | 61                                   | yes      | no              | 36553         | 2994                               | 41.9                                                | 39.1                                            |
| SA35                | m   | 31  | 18.01.2021                      | 52                                   | yes      | no              | 23301         | 1388                               | 27.9                                                | 38.7                                            |
| SA36                | m   | 25  | 18.01.2021                      | 52                                   | yes      | no              | 17300         | 2663                               | 43.7                                                | 34.5                                            |
| SA37                | f   | 53  | 11.01.2021                      | 60                                   | yes      | no              | 39374         | 3673                               | 24.2                                                | 51.7                                            |
| SA38                | f   | 44  | 27.12.2020                      | 78                                   | yes      | no              | 22795         | 2083                               | 17.6                                                | 29.6                                            |

| Patient | Sex | Age | Date of first positive PCR test | Days from positive PCR to blood draw | Symptoms | Hospitalization | AUC PRNT Beta | AUC PRNT wildtype (Munich isolate) | ACE2/RBD inhibition wildtype (percent) <sup>a</sup> | ACE2/RBD inhibition Beta (percent) <sup>a</sup> |
|---------|-----|-----|---------------------------------|--------------------------------------|----------|-----------------|---------------|------------------------------------|-----------------------------------------------------|-------------------------------------------------|
| SA39    | m   | 31  | 09.02.2021                      | 34                                   | yes      | no              | 24121         | 2182                               | 12.8                                                | 21.8                                            |
| SA40    | m   | 48  | 18.01.2021                      | 56                                   | yes      | no              | 27711         | 2745                               | 36.7                                                | 66.9                                            |
| SA41    | f   | 48  | 08.01.2021                      | 66                                   | yes      | no              | 32266         | 2855                               | 26.6                                                | 61.8                                            |
| SA42    | m   | 35  | 16.01.2021                      | 58                                   | yes      | no              | 7638          | 4355                               | 14.8                                                | 29.4                                            |
| SA43    | m   | 73  | 03.03.2021                      | 13                                   | yes      | yes             | 42477         | 13482                              | 9.8                                                 | 43.6                                            |

<sup>a</sup> Values below zero were set to zero, indicating no inhibition.

<sup>b</sup> SA2\_t2 refers to the second timepoint of sampling 50 days post-infection of subject SA2

**Table S2. Sequence features of monoclonal antibodies in this study.**

| mAb expression ID | mAb clone ID            | Ig class isotype | VH    | JH | CDR H3                    | SHM VH | light chain | VK/VL | JK/JL | CDR K3/L3    | SHM VK/VL | criteria for expression |
|-------------------|-------------------------|------------------|-------|----|---------------------------|--------|-------------|-------|-------|--------------|-----------|-------------------------|
| CS1               | SA2-101 <sup>(1)</sup>  | IgG1             | 3-30  | 6  | AKDFQYVAATHSPYYYYGMDV     | 2      | K           | 3-20  | 3     | QQYGSSPGVT   | 2         | a,e                     |
| CS2               | SA2-125                 | IgA1             | 3-15  | 6  | TTDLVDYDFWFGAYGMDV        | 12     | L           | 2-11  | 1     | SSYAGEYTCYV  | 14        | f                       |
| CS3K              | SA2-137                 | IgA1             | 1-2   | 6  | AREDY YCGGRTCYRPPYYYYGLDV | 17     | K           | 1-39  | 4     | QSYSTPRIT    | 1         | f                       |
| CS3L              | SA2-137                 | IgA1             | 1-2   | 6  | AREDY YCGGRTCYRPPYYYYGLDV | 17     | L           | 1-40  | 2     | QSYDNSLSGVV  | 14        | f                       |
| CS4               | SA2-149                 | IgG1             | 3-30  | 6  | AKDFGSTGTTLGYGMDV         | 4      | L           | 1-47  | 3     | AAWDDSLSGWV  | 1         | e                       |
| CS5               | SA2-158                 | IgA2             | 3-15  | 6  | STLGFYGDLIQRTFHYGLDV      | 45     | K           | 2-30  | 4     | MQGTRWPALS   | 34        | f                       |
| CS8               | SA2-178                 | IgG1             | 4-39  | 4  | ARHEGSTSPLMVKNYFDY        | 3      | K           | 1D-12 | 5     | QQANSFPIS    | 0         | e                       |
| CS9               | SA2-193                 | IgM              | 3-74  | 6  | ARGGDHDSADYMFVRVYRHNGMDV  | 20     | K           | 3-11  | 4     | HQRNNWPLT    | 8         | f                       |
| CS11              | SA2-205                 | IgG1             | 4-39  | 6  | ARRRGAAPGGWYYGMDV         | 0      | K           | 1-9   | 4     | QLNSYPPT     | 0         | e                       |
| CS12              | SA2-208                 | IgG1             | 3-30  | 6  | AKSGAPAAMRGYYYYGMDV       | 2      | L           | 7-46  | 2     | LLSYSGAREV   | 4         | e                       |
| CS15              | SA2-239 <sup>(2)</sup>  | IgM              | 3-30  | 6  | AKAPYAYCSSTSCYADYYGMDV    | 1      | L           | 2-14  | 2     | SSYTSSSVV    | 0         | a,e                     |
| CS18              | SA3-137 <sup>(3)</sup>  | IgM              | 5-51  | 6  | ARTATGTNHYYYYYMDV         | 0      | L           | 1-44  | 3     | AAWDDSLNGPV  | 0         | a,b                     |
| CS19              | SA3-149 <sup>(46)</sup> | IgA1             | 3-74  | 4  | ARAPALGGRGDY              | 10     | L           | 1-40  | 3     | QSYDSSLSGVV  | 4         | b                       |
| CS20              | SA3-185                 | IgM              | 3-74  | 4  | ARSAISPTVLFYD             | 6      | L           | 2-14  | 1     | SSYTSSSVV    | 4         | f                       |
| CS21              | SA3-195 <sup>(3)</sup>  | IgM              | 5-51  | 6  | ARTATGTNHYYYYYMDV         | 4      | L           | 1-44  | 2     | SSWDDSLNAVL  | 0         | a,b                     |
| CS23              | SA6-122                 | IgG1             | 3-53  | 6  | ARGTAMAYGMDV              | 2      | L           | 3-21  | 2     | QVWDSSSDHVV  | 3         | d                       |
| CS24              | SA5-126 <sup>(4)</sup>  | IgG1             | 4-39  | 5  | ARQFWTRPPSVWFDP           | 3      | L           | 1-51  | 3     | GTWDDSSLGAGV | 6         | a,e                     |
| CS26              | SA5-143                 | IgG1             | 3-15  | 6  | TTDPNQPPRGYYFYGLDV        | 3      | L           | 7-46  | 2     | LLSYSGAPVV   | 5         | f                       |
| CS27              | SA5-160                 | IgG3             | 4-39  | 2  | ARGIAARPGDWHFDL           | 0      | L           | 1-51  | 3     | GTWDDSSLRAGV | 1         | e                       |
| CS29              | SA5-170                 | IgG1             | 3-7   | 4  | ARALSMVRGVIIIPPYFDY       | 4      | L           | 6-57  | 3     | QSYDSSNHVV   | 2         | f                       |
| CS30              | SA5-176                 | IgG1             | 4-39  | 2  | ARRGWLRGYFDL              | 5      | L           | 6-57  | 2     | QSYDSTNHVV   | 1         | e                       |
| CS31              | SA5-195                 | IgG1             | 4-39  | 4  | ATQLWLRSNFDS              | 2      | L           | 6-57  | 2     | QSYDSGNVV    | 1         | e                       |
| CS34              | SA8-123                 | IgG1             | 3-7   | 4  | ARSQSTSWHDY               | 1      | L           | 6-57  | 2     | SLMITTIMW    | 4         | f                       |
| CS37              | SA5-219                 | IgG1             | 4-39  | 5  | ARHVGPPYSGYDKNNWFDP       | 3      | K           | 3-11  | 4     | QQRSNWPLT    | 0         | e                       |
| CS38              | SA5-233                 | IgG1             | 3-13  | 2  | ARDLTQDWYFDL              | 0      | K           | 1-39  | 5     | QSYSTPPIT    | 1         | c,e                     |
| CS39              | SA5-250                 | IgG1             | 3-15  | 3  | TTDKARNYDSSGYEHDAFDI      | 0      | K           | 1-39  | 5     | QSYSTLIT     | 3         | f                       |
| CS40              | SA5-252                 | IgG1             | 4-39  | 5  | ARHAAPRPGDSWFDP           | 0      | K           | 1-12  | 5     | QQANSFPT     | 2         | e                       |
| CS41              | SA5-259 <sup>(5)</sup>  | IgG1             | 4-39  | 5  | ARHAGPYSSSWIANWFDP        | 4      | K           | 1-9   | 4     | QLNSYPLT     | 1         | a,e                     |
| CS42              | SA5-260                 | IgM              | 3-15  | 4  | TTDSLVDVGGGSYVNFYD        | 3      | K           | 1-33  | 4     | QQYDNLPLT    | 2         | f                       |
| CS43              | SA5-263                 | IgG1             | 4-39  | 4  | ARRLGRPFNDHGNHFDY         | 2      | K           | 1-9   | 1     | QLNSYPWT     | 2         | e                       |
| CS44              | SA5-266 <sup>(6)</sup>  | IgG1             | 1-58  | 3  | AAPYCSGGTCHDGFDI          | 2      | K           | 3-20  | 1     | QQYGSSPWT    | 1         | b,c,e                   |
| CS45              | SA8-141                 | IgG1             | 4-39  | 3  | ARQSSPKLGDDAFDI           | 0      | L           | 1-51  | 2     | GTWDDSSLVTVV | 2         | e                       |
| CS46              | SA7-154 <sup>(7)</sup>  | IgM              | 3-30  | 6  | AKDRSVGATTSQYNYGMDV       | 11     | L           | 1-51  | 2     | GTWETSLSAEV  | 5         | a,c,e                   |
| CS47              | SA7-165 <sup>(7)</sup>  | IgM              | 3-30  | 6  | AKDRSVGATTSQSHYYGMDV      | 5      | L           | 1-51  | 2     | GTWDDSSLSTGV | 4         | a,c,e                   |
| CS48              | SA4-104 <sup>(8)</sup>  | IgG2             | 3-21  | 4  | VRDWYASSGANTRFDY          | 23     | L           | 1-44  | 3     | ETWDDSLGPGV  | 13        | a                       |
| CS49              | SA4-110                 | IgG1             | 3-53  | 3  | ARGKWLRFDAFI              | 9      | L           | 6-57  | 3     | QSYDSSDLWV   | 1         | d                       |
| CS50              | SA4-117                 | IgG1             | 3-30  | 4  | AKAGGWVSTRPPFDY           | 14     | L           | 1-40  | 1     | QSYDSSLSGYV  | 4         | e                       |
| CS51              | SA4-127                 | IgG2             | 3-53  | 4  | ATLITSEY                  | 11     | L           | 1-44  | 2     | ASWDDSLNGPV  | 10        | d                       |
| CS52              | SA4-138                 | IgG1             | 7-4-1 | 6  | ARTSGWSGSPSYGMDV          | 4      | L           | 7-43  | 1     | LLYFGGAQYV   | 4         | f                       |
| CS54              | SA4-142 <sup>(9)</sup>  | IgG1             | 3-53  | 6  | ARDLAVYGMVDV              | 3      | K           | 3-20  | 5     | QQYDSSLIT    | 3         | b,d                     |
| CS55              | SA4-156                 | IgG2             | 3-53  | 4  | ARGRFEH                   | 28     | L           | 7-46  | 3     | LFFFNGPGV    | 19        | d                       |
| CS56              | SA4-170                 | IgG1             | 4-4   | 4  | ASAPGTPWFDY               | 6      | L           | 2-14  | 1     | SSYTSSSTLYV  | 4         | f                       |
| CS57              | SA4-178 <sup>(10)</sup> | IgM              | 3-74  | 4  | ARGGVSGEMSNWAY            | 16     | L           | 7-43  | 3     | LLFFGDAWV    | 10        | a                       |
| CS58              | SA4-181                 | IgG3             | 4-4   | 3  | ARAYYYGSGSYNRFDAFI        | 9      | K           | 3-15  | 5     | QQYNNWPIT    | 1         | f                       |
| CS59              | SA4-184                 | IgG1             | 1-58  | 3  | AAPYCSGGSCFDAYDM          | 4      | K           | 3-20  | 3     | QQYGSSSLFT   | 0         | e                       |
| CS60              | SA2-102                 | IgM              | 4-34  | 4  | ARGKRYDYFWSGYWYFFDY       | 0      | L           | 2-14  | 2     | SSYTSSSTRVV  | 0         | f                       |

| mAb expression ID | mAb clone ID            | Ig class isotype | VH     | JH | CDR H3                  | SHM VH | light chain | VK/VL | JK/JL | CDR K3/L3    | SHM VK/VL | criteria for expression |
|-------------------|-------------------------|------------------|--------|----|-------------------------|--------|-------------|-------|-------|--------------|-----------|-------------------------|
| CS61              | SA2-119                 | IgM              | 3-21   | 6  | ARDSSSNYYYYGMDV         | 21     | K           | 1-39  | 4     | QQSYNTPRLI   | 21        | f                       |
| CS62              | SA2-130                 | IgA1             | 3-23   | 4  | ATKWGGELINYFDF          | 19     | K           | 3-11  | 4     | QQRNWPPT     | 11        | f                       |
| CS63              | SA2-163 <sup>(47)</sup> | IgM              | 4-59   | 4  | ARGGWSLDF               | 17     | K           | 3-20  | 2     | HQYGGSLPYT   | 17        | b,c                     |
| CS65              | SA2-198 <sup>(2)</sup>  | IgG1             | 3-30   | 6  | AKDLDIVLMVYAIPRGYYGMDV  | 6      | L           | 2-14  | 2     | SSYTSSPPVV   | 6         | a,e                     |
| CS67K             | SA3-290                 | IgG1             | 1-8    | 4  | VRGHGSYYDYWSGYPPFDY     | 17     | K           | 3-20  | 5     | QQYGSSPSIT   | 13        | f                       |
| CS67L             | SA3-290                 | IgG1             | 1-8    | 4  | VRGHGSYYDYWSGYPPFDY     | 17     | L           | 3-21  | 3     | QVWDRNDHWV   | 6         | f                       |
| CS68              | SA3-125 <sup>(11)</sup> | IgM              | 3-23   | 4  | AKRSPVYSWNPEDY          | 18     | K           | 1-5   | 1     | QQYNTYSRT    | 12        | a,c                     |
| CS69              | SA3-134                 | IgM              | 3-53   | 2  | ARDDVSGGYWYFDL          | 0      | K           | 3-11  | 2     | QQRSNWPHT    | 1         | d                       |
| CS70              | SA3-136 <sup>(12)</sup> | IgM              | 4-59   | 4  | ARNLGRGTGGSYYFDY        | 5      | L           | 1-47  | 3     | AAWDDSLSAWV  | 22        | a                       |
| CS71              | SA3-145                 | IgG1             | 7-4-1  | 3  | ARVSGWGIAALDDAFDI       | 0      | K           | 4-1   | 4     | QQYYSTPLT    | 1         | f                       |
| CS72              | SA3-147 <sup>(13)</sup> | IgA2             | 3-7    | 4  | ARSRGVYD                | 7      | K           | 2-30  | 5     | MQATHGPIT    | 4         | a                       |
| CS73              | SA3-148 <sup>(14)</sup> | IgM              | 3-74   | 4  | ARGGGHKYDH              | 19     | L           | 2-14  | 3     | SSYRNTVTL    | 9         | a,b                     |
| CS74              | SA3-151                 | IgG1             | 4-31   | 4  | ARDYGGNQNYFGY           | 5      | K           | 1-33  | 4     | QQYDNLPLT    | 4         | f                       |
| CS75              | SA3-153                 | IgA2             | 3-7    | 4  | ARSRGVYD                | 7      | K           | 1-39  | 2     | QQSYSTHT     | 0         | f                       |
| CS76              | SA3-180 <sup>(15)</sup> | IgG3             | 3-13   | 6  | ARSLHTSIAARFYYYYYYMDV   | 1      | K           | 1-39  | 1     | QQSYSTPSWT   | 3         | a,b,c,e                 |
| CS77              | SA3-189 <sup>(16)</sup> | IgM              | 1-3    | 4  | ARPKRSIAAAGIGNYFEY      | 11     | K           | 1-39  | 2     | QQSYITPGT    | 4         | a                       |
| CS79              | SA3-251 <sup>(17)</sup> | IgA2             | 3-33   | 4  | AKRGDSTGGVCSYFDY        | 9      | L           | 8-61  | 3     | VLYMGSGI WV  | 9         | a                       |
| CS80              | SA3-261 <sup>(48)</sup> | IgM              | 3-53   | 6  | ARSLAAAGTDGMDV          | 0      | L           | 3-25  | 3     | QSADSSGTWV   | 2         | b,d                     |
| CS81              | SA3-263                 | IgG3             | 7-4-1  | 6  | ARNYDFWIGHYYYYYMDV      | 3      | L           | 1-44  | 2     | AAWDDSLNGVV  | 2         | f                       |
| CS82              | SA6-108                 | IgG1             | 3-53   | 3  | ARDLHSSGPFDAFDI         | 3      | K           | 1-33  | 4     | QQYDI        | 4         | d                       |
| CS83              | SA6-120                 | IgG1             | 3-66   | 6  | VRGPAVHHYGM DV          | 7      | L           | 2-11  | 2     | CSYAGRYTPVL  | 9         | d                       |
| CS84              | SA5-127                 | IgG1             | 4-38-2 | 4  | ARDDYGDYAVSY            | 5      | L           | 1-40  | 1     | QSYDSSLSALYV | 0         | f                       |
| CS85              | SA5-129                 | IgG3             | 3-11   | 4  | ARELLLLGYCSGGSCYPVGP DY | 0      | L           | 6-57  | 3     | QSYDSSNHVV   | 1         | f                       |
| CS86              | SA5-135                 | IgM              | 3-9    | 4  | AKAWGGDWTTAVGY          | 5      | L           | 3-21  | 2     | QVWDSSSDPVI  | 2         | f                       |
| CS87              | SA5-162 <sup>(18)</sup> | IgM              | 3-13   | 6  | ARALYGSYSTQAGYYYYGMDV   | 1      | K           | 1-39  | 3     | QQSYRAFT     | 0         | a,c,e                   |
| CS88              | SA5-163                 | IgG1             | 1-18   | 4  | ARDYDYVWGSYPSACCY       | 0      | L           | 2-14  | 3     | SSYTSTN WV   | 2         | f                       |
| CS89              | SA5-179 <sup>(9)</sup>  | IgG1             | 3-53   | 6  | ARDLSVAGGMDV            | 3      | K           | 3-20  | 5     | QQYGSSPPIT   | 2         | b,d                     |
| CS90              | SA5-189 <sup>(19)</sup> | IgM              | 3-13   | 2  | ARVRPTMTKGF DWYFDL      | 2      | K           | 1-39  | 1     | QQSYNTLGT    | 4         | a,c,e                   |
| CS91              | SA5-191 <sup>(49)</sup> | IgM              | 3-53   | 6  | ARWAGADGMDV             | 3      | K           | 3-20  | 2     | QQYGSSQYT    | 2         | b,d                     |
| CS92              | SA5-256 <sup>(20)</sup> | IgG1             | 3-23   | 4  | AKDFVVVVAARSHDDYFDY     | 4      | K           | 1-5   | 4     | QQYKNFPLT    | 2         | a                       |
| CS93              | SA5-262 <sup>(21)</sup> | IgM              | 4-39   | 5  | ARLTPQAPGVVWFDP         | 0      | L           | 2-23  | 2     | CSYAGSSTYVV  | 3         | a,e                     |
| CS97              | SA4-153                 | IgG1             | 4-39   | 1  | ARVNSRDGHSYASGGHEDFQP   | 13     | L           | 3-27  | 3     | YSAADNSWV    | 10        | e                       |
| CS98              | SA4-177                 | IgG1             | 1-18   | 6  | ARDSSGWFYYYYGMDV        | 7      | L           | 2-8   | 3     | SSYAGSNL V   | 2         | f                       |
| CS99              | SA4-182                 | IgM              | 1-69   | 4  | ATQGGRFYCSGGSCYRYFFDY   | 1      | K           | 3-20  | 4     | QQYGSSPLT    | 0         | c                       |
| CS100             | SA4-183 <sup>(14)</sup> | IgM              | 3-74   | 4  | AKDPFGSGSF              | 18     | L           | 2-14  | 3     | SSYTSSSTWV   | 7         | a,b                     |
| CS101             | SA4-188 <sup>(8)</sup>  | IgG2             | 3-21   | 4  | ARLAAVGP GSPYYFDY       | 21     | L           | 1-44  | 2     | VTWDGSLDGWV  | 11        | a                       |
| CS102             | SA4-216 <sup>(6)</sup>  | IgG1             | 1-58   | 3  | AAPHCGGSCYDGF DI        | 1      | K           | 3-20  | 1     | QQYGSSPWT    | 1         | a,b,c,e                 |
| CS103             | SA4-236 <sup>(22)</sup> | IgG1             | 3-13   | 2  | ARGGGDGYNLGLWYFDL       | 3      | K           | 1-39  | 3     | QQSYSNPPPT   | 3         | b,c,e                   |
| CS104             | SA4-282                 | IgG1             | 4-39   | 4  | VTYSSGWDNEDY            | 15     | K           | 3-20  | 1     | QQYISPR T    | 12        | e                       |
| CS109             | SA3-158 <sup>(47)</sup> | IgM              | 4-59   | 4  | ARGGSR LDY              | 10     | K           | 3-20  | 2     | QQYGTSPYT    | 2         | b,c                     |
| CS110             | SA3-193 <sup>(11)</sup> | IgM              | 3-23   | 4  | AKRSPVYSYNPEDY          | 17     | K           | 1-5   | 1     | QQYNSYSRA    | 12        | a,c                     |
| CS111             | SA6-105                 | IgG1             | 3-64D  | 4  | VKDVTVDTAMVTIFDN        | 1      | K           | 1-39  | 4     | QQSYSTPT     | 0         | c                       |
| CS112             | SA5-134                 | IgG1             | 3-15   | 4  | TTDPGYTYSPAY            | 3      | K           | 1-39  | 3     | QQSYSTLFT    | 2         | c                       |
| CS113             | SA5-159                 | IgG1             | 3-9    | 6  | AKDIGYSSPHLVNYGMDV      | 2      | L           | 3-21  | 2     | QVWDSSGDHSVV | 2         | c                       |
| CS114             | SA5-165                 | IgG1             | 1-69   | 4  | ASSPLLR YFDWPHEAIFDY    | 2      | K           | 3-11  | 5     | QQRSNWSGIT   | 0         | c                       |
| CS115             | SA5-166                 | IgG1             | 1-69   | 4  | ACSSGRWGV L GNYFDY      | 23     | K           | 1-33  | 4     | QQYANLLLT    | 10        | f                       |
| CS116             | SA5-172 <sup>(23)</sup> | IgG2             | 3-30   | 6  | AKGDDYGD L FYYGMDV      | 1      | K           | 2-28  | 4     | MQALQRTLT    | 1         | a,e                     |
| CS117             | SA5-183                 | IgG1             | 3-9    | 6  | AKDAFGDPQGLY GMDV       | 1      | K           | 1-39  | 5     | QQSYSTPLT    | 0         | f                       |



| mAb expression ID | mAb clone ID              | Ig class isotype | VH     | JH | CDR H3                  | SHM VH | light chain | VK/VL | JK/JL | CDR K3/L3     | SHM VK/VL | criteria for expression |
|-------------------|---------------------------|------------------|--------|----|-------------------------|--------|-------------|-------|-------|---------------|-----------|-------------------------|
| CS120             | SA5-204                   | IgG1             | 3-30   | 4  | AKVLGSYCSGGSCYGGSFYD    | 2      | K           | 1-33  | 4     | QQYDNLPS      | 3         | c,e                     |
| CS123             | SA5-253                   | IgG1             | 4-59   | 5  | ARSRGYNYGLGLGWFD        | 2      | K           | 1-33  | 3     | QQYDDVPFT     | 7         | f                       |
| CS124             | SA7-164                   | IgM              | 4-39   | 1  | ARHTGYDSSGYRLEYFQH      | 3      | K           | 1-33  | 4     | QQYDNLPLT     | 4         | e                       |
| CS125             | SA9-204                   | IgM              | 1-18   | 5  | ARDGTSHYDSSGYGADRNFDP   | 0      | L           | 1-40  | 2     | QSYDSSLGWSV   | 1         | c                       |
| CS126             | SA10-101                  | IgG1             | 3-33   | 6  | ARDDYYGSGSYYYGMDV       | 0      | K           | 1-17  | 4     | LQHNSYRLT     | 0         | f                       |
| CS127             | SA10-105 <sup>(6)</sup>   | IgG1             | 1-58   | 3  | AAPNCSSGGSWYDAFDI       | 0      | K           | 3-20  | 1     | QQYGSSPWT     | 0         | a,b,c,e                 |
| CS128             | SA10-109                  | IgG1             | 5-51   | 4  | ARTEYGDPLDY             | 0      | K           | 1-16  | 4     | QQYNSYPLT     | 0         | f                       |
| CS129             | SA10-111                  | IgG1             | 3-48   | 4  | ARQPREYYDFWSGYRRLFYFDY  | 0      | K           | 1-33  | 4     | QQYDNLPLT     | 0         | f                       |
| CS130             | SA10-124                  | IgG1             | 4-38-2 | 3  | ARDREATVVRPPDAFDI       | 1      | K           | 2-28  | 4     | MQALQTPP      | 0         | f                       |
| CS131             | SA10-126 <sup>(49)</sup>  | IgG1             | 3-53   | 6  | ARWAQQLVPSENLKPYYYYGMDV | 0      | K           | 3-20  | 2     | QQYGSSPGYT    | 0         | b,d                     |
| CS133             | SA10-130                  | IgG1             | 4-61   | 5  | ARGLYYYDSSGYQMGDWFD     | 1      | K           | 3-11  | 4     | QQRSNWPLT     | 0         | f                       |
| CS134             | SA10-134                  | IgG1             | 3-23   | 5  | AKGTQIPIDYGDFFDP        | 0      | K           | 3-20  | 2     | QQYGSSPCT     | 1         | f                       |
| CS135             | SA13-138                  | IgG1             | 3-30   | 4  | AKGGGWYDYKGYFYD         | 0      | K           | 1-33  | 5     | QQYDNLPT      | 0         | e                       |
| CS136             | SA14-165 <sup>(24)</sup>  | IgG1             | 3-48   | 4  | VRVGHPTDLFGVDY          | 15     | K           | 3-15  | 2     | QQYNNWPRYS    | 2         | a                       |
| CS138             | SA14-176                  | IgM              | 3-15   | 4  | STRSFIAADSRIFIDY        | 0      | K           | 4-1   | 2     | QQYSTPYS      | 0         | f                       |
| CS139             | SA14-186 <sup>(24)</sup>  | IgG1             | 3-48   | 4  | ARVGHPTDLFGVEY          | 9      | K           | 3-15  | 2     | QQYNNWPRYS    | 5         | a                       |
| CS140             | SA15-191                  | IgM              | 3-15   | 5  | TTTIYRSP                | 0      | K           | 2-30  | 1     | MQTLYGWT      | 3         | f                       |
| CS143             | SA4-206                   | IgG3             | 1-58   | 4  | AAAIASAAPDY             | 5      | K           | 3-11  | 2     | QQRSNWPPYT    | 0         | e                       |
| CS144             | SA4-250                   | IgG3             | 3-33   | 4  | ARASMVRGVITGGFDY        | 0      | L           | 6-57  | 3     | QSYDSSNHV     | 1         | f                       |
| CS145             | SA2-206                   | IgG1             | 1-46   | 5  | ARGGIVPAATLLFDP         | 2      | K           | 1-5   | 2     | QQYNSYSCS     | 0         | f                       |
| CS146             | SA3-288                   | IgG2             | 1-3    | 4  | ARDGGVGPNNYFDY          | 19     | K           | 2-28  | 2     | MQALQTPFT     | 3         | f                       |
| CS148             | SA3-216                   | IgG1             | 4-38-2 | 4  | AKTRQQFIWD              | 12     | L           | 1-40  | 3     | QSYDRSLNWV    | 7         | f                       |
| CS149             | SA3-252                   | IgG2             | 3-23   | 5  | AKRGNTGPGFPWFDP         | 20     | K           | 3-11  | 4     | QQRSSWPLT     | 5         | f                       |
| CS151             | SA3-264                   | IgG1             | 3-13   | 6  | VRDGVRSGRGQYYMDV        | 17     | K           | 3-11  | 4     | HQHSNWPLT     | 13        | e                       |
| CS152             | SA4-311                   | IgG1             | 1-46   | 4  | ASTTVAYYFDY             | 4      | L           | 6-57  | 3     | QSYDSSIANWV   | 1         | f                       |
| CS153             | SA4-325 <sup>(6)</sup>    | IgG1             | 1-58   | 3  | AAPYCSGSSCLDGFDI        | 2      | K           | 3-20  | 1     | QQYGSSPWT     | 3         | a,b,c,e                 |
| CS154             | SA5-155                   | IgG1             | 4-31   | 5  | ARVSSPSGGRHWFDP         | 3      | L           | 1-51  | 2     | GTWDSSLRAPL   | 3         | f                       |
| CS155             | SA5-177                   | IgG1             | 3-23   | 3  | AKDTYYDIFPDVFDI         | 2      | L           | 2-14  | 1     | SSYSSSTLPV    | 6         | f                       |
| CS156             | SA5-184 <sup>(19)</sup>   | IgG1             | 3-13   | 2  | ARVRPTMTKGFWDYFDL       | 3      | K           | 1-39  | 1     | QQSYNTLGT     | 3         | a,e                     |
| CS157             | SA5-223                   | IgM              | 3-13   | 6  | ARGHFYGLIGYMDV          | 3      | K           | 1-39  | 4     | QQSYSTPLT     | 3         | c,e                     |
| CS158             | SA5-232 <sup>(15)</sup>   | IgM              | 3-13   | 6  | ARAAVDILTGYRGMV         | 0      | K           | 1-39  | 1     | QQSYNIAS      | 3         | a,b,c,e                 |
| CS160             | SA8-138                   | IgG1             | 7-4-1  | 3  | ASGDWNAFDI              | 0      | L           | 6-57  | 2     | QSYDSSNV      | 1         | f                       |
| CS161             | SA8-149 <sup>(25)</sup>   | IgG1             | 3-66   | 6  | ARDLAVYGMV              | 2      | L           | 3-21  | 2     | QVWDSSSDHPV   | 4         | a,d                     |
| CS162             | SA10-107                  | IgG1             | 5-10-1 | 1  | ARHAQGYDSSGYTGAIEYFQH   | 0      | K           | 1-33  | 4     | QQYDNLRLT     | 0         | f                       |
| CS163             | SA10-110 <sup>(26)</sup>  | IgG1             | 4-39   | 4  | ARQVAWLPRDDYFDY         | 2      | L           | 2-8   | 2     | SSYAGSNYVV    | 2         | b,e                     |
| CS165             | SA10-120                  | IgG1             | 5-51   | 5  | ARHMSGTHSSGWYERWFDP     | 0      | L           | 1-44  | 3     | AAWDDSLNGPV   | 0         | f                       |
| CS167             | SA2t2-105 <sup>(26)</sup> | IgG1             | 4-39   | 4  | ARFTPFAGLYYFDY          | 1      | L           | 2-8   | 2     | SSYAGTVL      | 3         | b,e                     |
| CS169             | SA2t2-107                 | IgG1             | 3-33   | 3  | ARDRFYDSSSYSLDAFDI      | 2      | L           | 1-36  | 3     | AAWDDSLNAWV   | 1         | f                       |
| CS170             | SA2t2-117 <sup>(50)</sup> | IgG1             | 4-39   | 4  | AREVAPIKQWLVSFYD        | 4      | L           | 1-40  | 3     | QSYDSSLGLV    | 2         | b,e                     |
| CS171             | SA2t2-127                 | IgG1             | 3-30   | 4  | AKDPPQFAVAGTYFYD        | 6      | L           | 3-21  | 3     | QVWDSSSDPWV   | 3         | e                       |
| CS172             | SA2t2-129                 | IgG1             | 3-30   | 4  | AKAVYSYAYAVLYFYD        | 6      | L           | 6-57  | 2     | QSYDNNHV      | 7         | e                       |
| CS173             | SA2t2-130 <sup>(22)</sup> | IgG1             | 3-13   | 2  | ARGGAVIPVWYFDL          | 5      | K           | 1-39  | 3     | QQSYSHPGIT    | 5         | b,c,e                   |
| CS175             | SA2t2-136                 | IgG1             | 1-69   | 5  | ARREYSSTDWFDP           | 4      | L           | 3-21  | 1     | QVWDSTSDHPGYV | 3         | f                       |
| CS176             | SA2t2-139                 | IgG1             | 3-66   | 3  | ARWGRVGATGLAFDI         | 6      | L           | 3-21  | 1     | QVWDSSSDHYYV  | 4         | d                       |
| CS177             | SA2t2-144                 | IgG1             | 3-66   | 6  | ARLRPDYHLWSGLMDV        | 5      | K           | 3-15  | 4     | QQYNNWPLT     | 3         | d                       |
| CS178             | SA2t2-161                 | IgG1             | 3-30   | 4  | AKKGMICYGGDCYSYFYD      | 7      | K           | 1-39  | 2     | QQSYSTPMCS    | 3         | e                       |
| CS179             | SA2t2-169 <sup>(51)</sup> | IgG1             | 4-31   | 5  | ARTTAPRPGSSWFDP         | 7      | L           | 1-51  | 3     | GTWDNTLSPGRGV | 8         | b                       |
| CS180             | SA2t2-174 <sup>(6)</sup>  | IgG1             | 1-58   | 3  | AAPACSSSTRCYDGFDI       | 6      | K           | 3-20  | 1     | QQYGSSPWT     | 1         | a,b,c,e                 |

| mAb expression ID | mAb clone ID              | Ig class isotype | VH     | JH | CDR H3                     | SHM VH | light chain | VK/VL | JK/JL | CDR K3/L3   | SHM VK/VL | criteria for expression |
|-------------------|---------------------------|------------------|--------|----|----------------------------|--------|-------------|-------|-------|-------------|-----------|-------------------------|
| CS181             | SA2t2-175                 | IgG1             | 1-18   | 4  | ARDGGWTGIVGAINFDY          | 7      | L           | 1-47  | 3     | ATWDDSLSGWV | 4         | f                       |
| CS182             | SA2t2-182                 | IgG1             | 3-53   | 6  | ARDLITYGMDV                | 8      | K           | 1-9   | 4     | QHLLT       | 4         | d                       |
|                   | SA2-105                   | IgG1             | 4-38-2 | 4  | AREPFNGPRFLYRGSYFDF        | 15     | K           | 3-20  | 1     | QQYGSSPPT   | 6         |                         |
|                   | SA2-114                   | IgM              | 3-23   | 3  | AKSLFYGPTAMLYTFDI          | 11     | K           | 1-27  | 3     | KTITVPRSL   | 8         |                         |
|                   | SA2-115                   | IgG1             | 4-30-4 | 4  | ANIAARLPGSYFYDY            | 2      | K           | 3-15  | 1     | QQYKNWPRT   | 4         |                         |
|                   | SA2-118                   | IgM              | 3-23   | 4  | AKAFSTGWGYFYGS             | 18     | K           | 3-11  | 2     | QQRSNWPMCS  | 9         |                         |
|                   | SA2-122                   | IgG1             | 3-49   | 4  | TLVCYYDILTYGYCY            | 0      | K           | 1-5   | 2     | QQYNSYPYT   | 0         |                         |
|                   | SA2-124                   | IgM              | 3-23   | 3  | AKDKYDWRRAFDM              | 7      | K           | 1-5   | 1     | QQYNSYPWT   | 1         |                         |
|                   | SA2-129 <sup>(2)</sup>    | IgG1             | 3-30   | 6  | AKDLDIVLMVYAIPRGYYGMDV     | 6      | L           | 2-14  | 2     | SYNSSSCCL   | n/d       |                         |
|                   | SA2-136                   | IgG1             | 3-30   | 2  | AKDHRLTSIIIVLTGPFDF        | 25     | K           | 1-39  | 2     | QQSYGTPLT   | 16        |                         |
|                   | SA2-138                   | IgM              | 1-46   | 4  | ARLDGGSYNDY                | 17     | K           | 4-1   | 1     | NNIILILDR   | 11        |                         |
|                   | SA2-142                   | IgM              | 3-23   | 3  | AITGRNVPDSAFDI             | 14     | K           | 1-39  | 1     | QQSHSTPRT   | 10        |                         |
|                   | SA2-144                   | IgG2             | 1-69   | 5  | ATSGHSSLLNWFDP             | 22     | K           | 3-11  | 2     | QQRSNWPNT   | 3         |                         |
|                   | SA2-147                   | IgM              | 3-30   | 6  | ARVAGSSASPYSYYGMDV         | 13     | K           | 2-28  | 2     | MQUALPYPT   | 12        |                         |
|                   | SA2-148                   | IgM              | 4-4    | 4  | ARQGDYTSY                  | 15     | L           | 2-8   | 1     | SSYAGSLYV   | 7         |                         |
|                   | SA2-150                   | IgM              | 3-23   | 4  | ARTPPRPGTDYFDL             | 40     | K           | 3-15  | 1     | QQYSKWPGT   | 5         |                         |
|                   | SA2-154                   | IgG1             | 3-30   | 6  | ARETTETYHEFWSGYNIDYYFYGMDV | 16     | K           | 1-39  | 1     | QQSYSAPPWT  | 19        |                         |
|                   | SA2-159                   | IgM              | 1-69   | 4  | RRGECITIFGVVTP             | 8      | K           | 2-28  | 2     | MQUALQTPPDT | 0         |                         |
|                   | SA2-162                   | IgM              | 1-18   | 4  | ARGPIVVLPAARGADANFDY       | 14     | K           | 1-NL1 | 4     | QQYYSTPLT   | 1         |                         |
|                   | SA2-167                   | IgG1             | 4-39   | 6  | ARRQGGYEEYYGLDV            | 9      | K           | 3-15  | 2     | QQYNDWRSS   | 12        |                         |
|                   | SA2-171                   | IgM              | 4-59   | 6  | ARVKRGSYDLDV               | 17     | K           | 3-11  | 1     | QQRDNWPQT   | 12        |                         |
|                   | SA2-175                   | IgG1             | 3-49   | 6  | TSPGGTMVRGALGDYYGMDV       | 4      | K           | 2-28  | 3     | MQUALQTLFT  | 0         |                         |
|                   | SA2-180                   | IgM              | 3-48   | 4  | ARDYNWTPDY                 | 9      | K           | 1-17  | 4     | LQHNSYPSLT  | 5         |                         |
|                   | SA2-183                   | n/d              | 1-18   | 5  | LWLLPYGP                   | 36     | K           | 1-33  | 3     | QQYDNLPLT   | 0         |                         |
|                   | SA2-184                   | IgG1             | 3-30   | 6  | AKDLDIVLMVYAIPRGYYGMDV     | 10     | K           | 3-20  | 4     | LHYGSSPT    | 15        |                         |
|                   | SA2-185                   | IgG1             | 3-30   | 4  | AKSGGTDPRMVVYFYDY          | 0      | L           | 2-14  | 2     | SSYSSSPPVV  | 6         |                         |
|                   | SA2-186                   | IgG1             | 4-31   | 4  | ARESQQLVPIFYDY             | 0      | L           | 3-1   | 3     | QAWDSSTFWV  | 1         |                         |
|                   | SA2-190                   | IgG1             | 3-23   | 4  | AKDYNWRGELDY               | 5      | L           | 1-47  | 2     | AAWDDSLSGVV | 4         |                         |
|                   | SA2-191                   | IgG1             | 3-30   | 4  | AKDLGRYCSGTSCYGAGYFYDY     | 1      | K           | 1D-13 | 4     | QQFNYPPT    | 1         |                         |
|                   | SA2-195 <sup>(27)</sup>   | IgM              | 1-58   | 6  | GRGYYGVDV                  | 48     | K           | 1-33  | 3     | QQYDNLPLT   | 0         |                         |
|                   | SA2-197                   | IgM              | 4-39   | 6  | ARHSSSLGADYYNGLDV          | 12     | K           | 1-39  | 2     | QQSYSTPMYT  | 4         |                         |
|                   | SA2-204                   | IgM              | 3-66   | 3  | ARGGAFDI                   | 16     | K           | 1-5   | 1     | QQYNSYWT    | 5         |                         |
|                   | SA2-209                   | IgM              | 3-30   | 4  | AKSYGSSGYTIKALFDY          | 0      | K           | 3-20  | 1     | QHYGSSFRL   | 10        |                         |
|                   | SA2-210                   | IgM              | 4-34   | 6  | ARGYYDFWSGYFPPNYGMDV       | 2      | K           | 1D-16 | 5     | QQYNTYPIN   | 7         |                         |
|                   | SA2-214                   | IgM              | 3-23   | 5  | AKVSHYYGSGSSAS             | 33     | K           | 1-33  | 4     | QQYDNLRLT   | 4         |                         |
|                   | SA2-225                   | IgM              | 1-3    | 6  | ARPPFNYYDSSGYLNVPYGMVDV    | 2      | K           | 3-20  | 4     | QQYGSSPPVT  | 5         |                         |
|                   | SA2-230 <sup>(28)</sup>   | IgG1             | 3-30   | 4  | AKGQGVYCSGGSCYSGFCDY       | 4      | K           | 3-20  | 4     | QQYGSSPPVT  | 3         |                         |
|                   | SA2-238                   | IgG1             | 4-39   | 4  | AREVGATTMNYFDY             | 2      | K           | 3-11  | 4     | QQRSNWPPSLT | 7         |                         |
|                   | SA2-241                   | IgG3             | 5-10-1 | 6  | ARQGLYYDILTYGYRDYYGMDV     | 1      | K           | 3-20  | 3     | QQYGSSQGV   | 2         |                         |
|                   | SA2t2-103                 | IgG1             | 4-38-2 | 5  | ARMEYYYDSSGYSRLGWFDP       | 0      | K           | 1-39  | 2     | QQSYSTPYT   | 3         |                         |
|                   | SA2t2-104                 | IgG1             | 5-51   | 5  | ARLATPLQYNWFDP             | 10     | L           | 2-14  | 2     | SSYSSSSTLVI | 4         |                         |
|                   | SA2t2-106 <sup>(29)</sup> | IgG1             | 1-18   | 4  | AREGPDIVLEPVAMGYDH         | 3      | K           | 3-20  | 2     | QQFGSSRYS   | 2         |                         |
|                   | SA2t2-108 <sup>(30)</sup> | IgG1             | 3-30   | 6  | AKDSRPLPAAMPGYYYGMDV       | 7      | K           | 2-28  | 1     | MQUALQTPQT  | 4         |                         |
|                   | SA2t2-112 <sup>(27)</sup> | IgG1             | 1-58   | 6  | GRGYYGVDV                  | 6      | K           | 1-33  | 3     | QQFDNLPLT   | 3         |                         |
|                   | SA2t2-113                 | IgG1             | 3-30-3 | 4  | ARVYNDFSVTPYHYFYDY         | 12     | K           | 2-28  | 2     | MQUALQTPPCS | 2         |                         |
|                   | SA2t2-114                 | IgG1             | 3-48   | 3  | ARTYGDWPAFDI               | 3      | L           | 1-51  | 3     | GTWDGSLSAWV | 5         |                         |
|                   | SA2t2-115                 | IgG1             | 4-34   | 4  | ARVYCSGACYFYDY             | 9      | L           | 6-57  | 3     | QSYDSSNWV   | 6         |                         |
|                   | SA2t2-116                 | IgG1             | 3-30   | 6  | AKAFFRYCSSTSCGRDYYHGLDV    | 0      | L           | 1-40  | 1     | QSYDSSLSGCV | 6         |                         |

| mAb expression ID | mAb clone ID              | Ig class isotype | VH     | JH | CDR H3                 | SHM VH | light chain | VK/VL | JK/JL | CDR K3/L3    | SHM VK/VL | criteria for expression |
|-------------------|---------------------------|------------------|--------|----|------------------------|--------|-------------|-------|-------|--------------|-----------|-------------------------|
|                   | SA2t2-119 <sup>(31)</sup> | IgG1             | 3-30-3 | 4  | ARSGSYGYDY             | 6      | K           | 1-33  | 4     | QQYDNLPLT    | 0         |                         |
|                   | SA2t2-120                 | IgG3             | 4-30-2 | 3  | ARLALWGAFDI            | 2      | K           | 1-33  | 2     | QQYDNLSTW    | 3         |                         |
|                   | SA2t2-122                 | IgG1             | 3-15   | 5  | TTGPPGLIVGPDNWFDP      | 3      | L           | 1-40  | 1     | QSYDSSLGYYV  | 7         |                         |
|                   | SA2t2-123                 | IgG1             | 4-38-2 | 5  | ARHGNRIVYLTSSESNWFDP   | 14     | L           | 6-57  | 3     | QSYDSTNRG    | 31        |                         |
|                   | SA2t2-125                 | IgG1             | 1-58   | 3  | AAPHCNRTTCHDGFDI       | 0      | K           | 1-39  | 1     | QQTYSTPRR    | 10        |                         |
|                   | SA2t2-128                 | IgG1             | 1-69   | 1  | ADMTNYYDSSGPPYFQH      | 11     | L           | 1-44  | 3     | AVWDDSLNGWV  | 4         |                         |
|                   | SA2t2-132                 | IgG1             | 3-30   | 6  | AKDQDIVLMVYGIPRGLYGMV  | 1      | L           | 2-8   | 2     | SSYAGSNNFGVV | 2         |                         |
|                   | SA2t2-134                 | IgG1             | 3-30   | 4  | AKGPWYYYASSTFSGARTDFDY | 4      | L           | 1-47  | 2     | AAWDDSLASGCG | 6         |                         |
|                   | SA2t2-140 <sup>(32)</sup> | IgG1             | 4-30-4 | 4  | ARTIARPGDFYFDF         | 7      | L           | 1-47  | 2     | AAWDDSLSGPV  | 3         |                         |
|                   | SA2t2-141 <sup>(29)</sup> | IgG1             | 1-18   | 4  | AREGPDIVVVPVAMGYDY     | 6      | K           | 3-20  | 2     | QQFGSSRYS    | 5         |                         |
|                   | SA2t2-146 <sup>(28)</sup> | IgG1             | 3-30   | 4  | AKTPLPYCTNGVCYIDY      | 0      | K           | 3-20  | 4     | QQYGRSPLT    | 20        |                         |
|                   | SA2t2-147                 | IgG1             | 3-30   | 4  | AKAVYSYAYGALYFDY       | 4      | K           | 3-15  | 1     | QQYKNWPRT    | 4         |                         |
|                   | SA2t2-148 <sup>(1)</sup>  | IgG1             | 3-30   | 6  | AKDFQYVAATHSPYYYGMDV   | 5      | K           | 3-20  | 3     | QQYGSSPGVT   | 5         |                         |
|                   | SA2t2-149 <sup>(32)</sup> | IgG1             | 4-30-4 | 4  | ARTIARPGDFYFDF         | 10     | L           | 1-47  | 2     | SAWDDSLSGPV  | 6         |                         |
|                   | SA2t2-150                 | IgG1             | 4-30-4 | 4  | ARLLAPRPGSYFDF         | 7      | L           | 2-23  | 3     | CSYAGCSTFG   | 7         |                         |
|                   | SA2t2-152                 | IgG1             | 3-30   | 4  | AKQLGSYYARSSYYFDY      | 2      | K           | 1-33  | 3     | QQYDNLSTV    | 3         |                         |
|                   | SA2t2-153                 | IgG1             | 4-30-4 | 5  | ARLAAPASSYWFDP         | 8      | L           | 1-51  | 7     | GTWDDSLGVAV  | 6         |                         |
|                   | SA2t2-157 <sup>(33)</sup> | IgG1             | 1-69   | 4  | AREIPQGRYGDYEGAFDY     | 7      | K           | 1-39  | 3     | QQSYSTPRFT   | 4         |                         |
|                   | SA2t2-162                 | IgG1             | 4-30-4 | 6  | ARETTGTTSSIKYHYGIDV    | 6      | K           | 3-15  | 1     | QQYNNWPPWT   | 7         |                         |
|                   | SA2t2-163 <sup>(31)</sup> | IgG1             | 3-30-3 | 4  | ARGGGRGFY              | 9      | K           | 1-33  | 4     | QQFDNLPT     | 10        |                         |
|                   | SA2t2-164                 | IgG1             | 3-21   | 6  | ARDREGGAEGMDV          | 14     | K           | 1-5   | 1     | QQYSSYLRT    | 10        |                         |
|                   | SA2t2-170                 | IgG1             | 4-59   | 3  | ARNRWLRGAFDI           | 10     | L           | 6-57  | 1     | QSYDSSNYV    | 2         |                         |
|                   | SA2t2-172 <sup>(30)</sup> | IgG1             | 3-30   | 6  | AKDSRPVPAAMPDYYYGMDV   | 6      | K           | 2-28  | 1     | MQALQTPQT    | 1         |                         |
|                   | SA2t2-173K                | IgG1             | 4-30-4 | 6  | ARVVVMNYNYGMDV         | 2      | K           | 2-30  | 4     | MQDTHWPPGLT  | 4         |                         |
|                   | SA2t2-173L                | IgG1             | 4-30-4 | 6  | ARVVVMNYNYGMDV         | 2      | L           | 2-23  | 1     | CSYAGSYV     | 3         |                         |
|                   | SA2t2-176                 | IgG1             | 1-18   | 4  | ARDNYYGDHVPDY          | 9      | L           | 2-14  | 1     | SSYTRSNTLV   | 7         |                         |
|                   | SA2t2-177                 | IgG1             | 3-30   | 4  | AKSGYGYAYNSGYFDY       | 5      | K           | 1-33  | 2     | QQYDNLPRYT   | 3         |                         |
|                   | SA2t2-178                 | IgG1             | 4-31   | 5  | ARETVAPNSNWFDP         | 8      | L           | 1-44  | 2     | STWDYSLSVMW  | n/d       |                         |
|                   | SA2t2-179                 | IgM              | 3-48   | 6  | ARDSGIVVPAAFYGMV       | 3      | K           | 3-20  | 1     | QQYGSSPWT    | 3         |                         |
|                   | SA2t2-180 <sup>(33)</sup> | IgG1             | 1-69   | 4  | ARDTHSGYSYGTDFY        | 3      | K           | 1-39  | 3     | QQSSSTPRFT   | 3         |                         |
|                   | SA2t2-181 <sup>(6)</sup>  | IgG1             | 1-58   | 3  | AAPACNRTSCYDGFDI       | 3      | K           | 3-20  | 1     | QQYGTSPWT    | 4         |                         |
|                   | SA3-104                   | IgG2             | 3-7    | 6  | ARVRHYQLPFYSYMDV       | 11     | K           | 1-39  | 1     | QQSYSTLDT    | 9         |                         |
|                   | SA3-105                   | IgG2             | 3-23   | 3  | ANRDWSQGGGFDI          | 44     | K           | 3-11  | 5     | SSAATGRSP    | 16        |                         |
|                   | SA3-108                   | IgG1             | 1-46   | 6  | AREWVPATATSYYYMDV      | 2      | K           | 1-16  | 4     | QQYNSYPRSL   | 4         |                         |
|                   | SA3-114                   | IgG1             | 3-33   | 5  | ARDGPDYDSSGYYVWFDS     | 3      | K           | 1-39  | 1     | NRVTVPLRGR   | 7         |                         |
|                   | SA3-116                   | IgG1             | 4-34   | 4  | ARGGLEDWNDSSFDS        | 10     | K           | 3-20  | 2     | QQTSTRMYT    | 14        |                         |
|                   | SA3-117                   | IgG1             | 3-9    | 2  | AKLLSVGEYFDL           | 7      | K           | 1-27  | 3     | KSITVPLH     | 7         |                         |
|                   | SA3-122                   | IgG1             | 3-33   | 6  | AKGYSSPYYYMDV          | 2      | K           | 2-28  | 4     | MQALQTPLT    | 2         |                         |
|                   | SA3-124                   | IgG1             | 4-34   | 6  | ARGRLYSSSWYYYMDV       | 20     | L           | 1-44  | 2     | ATWDDSLNVV   | 14        |                         |
|                   | SA3-127                   | IgM              | 4-39   | 3  | ARDRPSGNWNYDIDAFDI     | 12     | K           | 3-20  | 1     | QQYGSSPRT    | 0         |                         |
|                   | SA3-130                   | IgA2             | 3-74   | 4  | TRLTVGEPAGRDI          | 10     | K           | 3-11  | 4     | QQRNNWPLT    | 7         |                         |
|                   | SA3-131                   | IgM              | 1-18   | 4  | ARTIYEDH               | 18     | K           | 3-20  | 1     | QQYGNLPRT    | 10        |                         |
|                   | SA3-132                   | IgM              | 3-15   | 2  | ITGWYFDL               | 17     | K           | 3-20  | 2     | LQYGNSPMYT   | 16        |                         |
|                   | SA3-135 <sup>(15)</sup>   | IgG1             | 3-13   | 6  | ARVRETHYSKDAKPYYYMDV   | 2      | K           | 1-39  | 1     | QQSYTNPLGT   | 11        |                         |
|                   | SA3-141                   | IgM              | 3-7    | 3  | ARGYCTGGVCSDAFDI       | 15     | K           | 1-12  | 3     | QQANSFPFT    | 3         |                         |
|                   | SA3-157                   | IgM              | 5-51   | 4  | ARHDPGASGALDY          | 0      | K           | 1-39  | 2     | QQSYSTPYT    | 8         |                         |
|                   | SA3-159                   | IgM              | 3-74   | 4  | TSRYILPTTRGSDFDY       | 3      | K           | 3-20  | 2     | QQYGSSLYT    | 3         |                         |
|                   | SA3-160                   | IgG1             | 1-18   | 3  | ARMGRMIVGLWGAFDL       | 17     | L           | 1-47  | 3     | AAWDDSLSGWV  | 7         |                         |

| mAb expression ID | mAb clone ID            | Ig class isotype | VH     | JH | CDR H3                    | SHM VH | light chain | VK/VL | JK/JL | CDR K3/L3    | SHM VK/VL | criteria for expression |
|-------------------|-------------------------|------------------|--------|----|---------------------------|--------|-------------|-------|-------|--------------|-----------|-------------------------|
|                   | SA3-163                 | IgM              | 3-21   | 6  | ARDPQKTYDFWSGYASGDGYYYMDV | 0      | L           | 1-44  | 3     | AAWDDSLNGWV  | 1         |                         |
|                   | SA3-165                 | IgM              | 3-33   | 4  | AKRGSRWDFDY               | 11     | L           | 2-8   | 2     | SSHAGNNNLV   | 6         |                         |
|                   | SA3-167 <sup>(16)</sup> | IgM              | 1-3    | 4  | ARPKRSIAAAGIGNYFEY        | 11     | K           | 1-39  | 2     | QSYITPGT     | 4         |                         |
|                   | SA3-168                 | IgM              | 4-59   | 4  | ARNLGRGTGGSYYFDS          | 23     | K           | 4-1   | 4     | QQCYSSPH     | 18        |                         |
|                   | SA3-173                 | IgM              | 1-3    | 6  | ARVMPYCSGGSCYSPYYGMDV     | 4      | L           | 1-44  | 3     | AAWDDSLNVWV  | 2         |                         |
|                   | SA3-174                 | IgM              | 3-15   | 5  | TIPGGAGADLKRSGFDP         | 7      | K           | 4-1   | 3     | QQYYSTPFT    | 2         |                         |
|                   | SA3-176                 | IgM              | 3-74   | 5  | ARGCSGVSCYGGP             | 7      | K           | 3-20  | 1     | QQYGSSPWT    | 6         |                         |
|                   | SA3-181 <sup>(13)</sup> | IgG2             | 3-7    | 4  | ARKGAWDVDF                | 15     | K           | 2-30  | 5     | FGQTHWPPT    | 11        |                         |
|                   | SA3-186                 | IgM              | 3-7    | 4  | ATYCSGDGCRSFDH            | 21     | K           | 1-16  | 5     | QQYKSYPII    | 8         |                         |
|                   | SA3-190 <sup>(34)</sup> | IgM              | 1-18   | 6  | ARDTRITPNGMDV             | 6      | K           | 3-20  | 1     | QQYGSSPRT    | 4         |                         |
|                   | SA3-191                 | IgG1             | 4-34   | 6  | VVIAIPFMSHILHGR           | 18     | K           | 1-33  | 3     | QQHDNLPT     | 2         |                         |
|                   | SA3-197                 | IgG1             | 3-74   | 2  | AGAGGWHLDL                | 27     | K           | 1-33  | 4     | QQHDSLPLT    | 28        |                         |
|                   | SA3-199                 | IgM              | 3-74   | 3  | ARGQKGVPGAFDI             | 9      | L           | 2-14  | 2     | SSYTSITSPLV  | 7         |                         |
|                   | SA3-201 <sup>(14)</sup> | IgM              | 3-73   | 4  | TRHLGTNFDD                | 3      | L           | 2-14  | 3     | NSYTTTSTWV   | 11        |                         |
|                   | SA3-203                 | IgM              | 3-74   | 3  | ARPRSGAFDI                | 8      | K           | 3-20  | 1     | QQYGSSPWT    | 8         |                         |
|                   | SA3-205                 | IgM              | 3-30   | 4  | ARAPSGGGSNMRVYRVFDY       | 23     | L           | 2-14  | 1     | SSYSSNNYV    | 3         |                         |
|                   | SA3-209                 | IgG3             | 3-30   | 3  | ASYPELLYAFGI              | 3      | K           | 1-5   | 1     | QQYNSFPWT    | 8         |                         |
|                   | SA3-211                 | IgG1             | 3-30   | 4  | ARDTWGSKWGSLGY            | 29     | K           | 1-27  | 4     | QKYNAPLT     | 12        |                         |
|                   | SA3-213                 | IgG1             | 3-7    | 4  | VGGGYNGY                  | 17     | L           | 7-46  | 3     | LLLYSGPWV    | 15        |                         |
|                   | SA3-214                 | IgM              | 1-18   | 5  | ARDPSNTSGWREWFDP          | 13     | K           | 3-20  | 4     | QQYGSSPFT    | 6         |                         |
|                   | SA3-218                 | IgM              | 3-9    | 4  | VKGFSSGIGQIPGAY           | 16     | K           | 3-15  | 1     | QQYNNWPWT    | 8         |                         |
|                   | SA3-219 <sup>(16)</sup> | IgM              | 1-3    | 4  | ARPKRTIAAAGIGNYFEY        | 11     | K           | 1-39  | 2     | QSYITPGT     | 11        |                         |
|                   | SA3-221 <sup>(16)</sup> | IgM              | 1-3    | 4  | ARPKRSIAAAGIGNYFEY        | 10     | K           | 1-39  | 2     | QSYSSPGT     | 8         |                         |
|                   | SA3-222 <sup>(50)</sup> | IgM              | 4-39   | 4  | ARLARRSSSRTYFDY           | 16     | L           | 1-40  | 3     | QSYDSSLSTS   | 7         |                         |
|                   | SA3-223                 | IgG1             | 3-7    | 4  | ARDRYSGAWYGIPFDY          | 5      | L           | 1-44  | 1     | AAWDDSLNGFLC | 1         |                         |
|                   | SA3-224 <sup>(12)</sup> | IgM              | 4-59   | 4  | TRNLGRGTGGSYYFFDY         | 11     | L           | 1-47  | 3     | AVWDDSLSGWV  | 4         |                         |
|                   | SA3-228                 | IgM              | 3-73   | 4  | ARHGSGIDY                 | 6      | L           | 2-14  | 2     | SSYSSSTLV    | 7         |                         |
|                   | SA3-236                 | IgA1             | 3-7    | 6  | ANTYSNIRPFYYWFLDV         | 24     | L           | 2-8   | 1     | SSHAGSDTPFV  | 15        |                         |
|                   | SA3-237 <sup>(16)</sup> | IgM              | 1-3    | 4  | ARPKRSIAAAGIGNYFEY        | 11     | K           | 1-39  | 2     | QSYITPGT     | 7         |                         |
|                   | SA3-238                 | IgM              | 3-23   | 4  | ATRRYSGGVWYPFEY           | 8      | K           | 1-27  | 4     | QKVDSAPLT    | 12        |                         |
|                   | SA3-239                 | IgG1             | 1-46   | 5  | ARDAIAVAGRGWFDP           | 7      | K           | 3-11  | 1     | QQRSNWWT     | 3         |                         |
|                   | SA3-240                 | IgM              | 3-23   | 4  | AILRYTVTTPVVSQ            | 3      | L           | 1-47  | 3     | AAWDDSLTGWV  | 2         |                         |
|                   | SA3-242                 | IgA1             | 3-33   | 3  | AKDLRQWDLGTGFDI           | 8      | K           | 3-15  | 4     | QQYNNWPWSPLT | 24        |                         |
|                   | SA3-244 <sup>(34)</sup> | IgM              | 1-18   | 6  | ARRPSTGTTGPGYGMDV         | 19     | K           | 3-20  | 1     | QLYGGSPWWT   | 8         |                         |
|                   | SA3-253                 | IgG1             | 4-38-2 | 1  | AKTRQQFIWD                | 15     | L           | 1-40  | 3     | QSYDRSLNWV   | 6         |                         |
|                   | SA3-254                 | IgA1             | 1-18   | 1  | GRDSYQRFSAPHH             | 19     | K           | 3-15  | 2     | QQYNNWPPTYT  | 4         |                         |
|                   | SA3-255                 | IgM              | 3-74   | 4  | ARGPWGG                   | 15     | L           | 2-11  | 2     | RSYAGNFTFVV  | 13        |                         |
|                   | SA3-256                 | IgM              | 3-33   | 4  | AIGPKAYIVATMGEYYFEY       | 8      | L           | 1-51  | 1     | GTWDDSSLAYV  | 5         |                         |
|                   | SA3-257                 | IgM              | 3-74   | 4  | VRGGTIGVTGTDY             | 16     | K           | 3-11  | 1     | QQRSNWPQT    | 2         |                         |
|                   | SA3-258                 | IgG3             | 4-4    | 4  | ARALRLRGTYPPYFNL          | 43     | K           | 1-39  | 2     | TELQHPSD     | 25        |                         |
|                   | SA3-259 <sup>(34)</sup> | IgM              | 1-18   | 6  | ARRPSTGTTGPGYGMDV         | 19     | K           | 3-20  | 1     | QLYGGSPWWT   | 7         |                         |
|                   | SA3-260 <sup>(3)</sup>  | IgM              | 5-51   | 6  | ARTATGTHNYYYYYYMDV        | 0      | L           | 1-44  | 3     | AAWDDSLNGPV  | 0         |                         |
|                   | SA3-262                 | IgM              | 3-74   | 4  | ARGGGSYFDY                | 4      | L           | 2-8   | 1     | SSYAGSNTPSV  | 4         |                         |
|                   | SA3-265                 | IgM              | 1-3    | 4  | AREAWGAAGSYHDFD           | 18     | K           | 3-20  | 2     | LQCGSSPRPGYT | 10        |                         |
|                   | SA3-266 <sup>(16)</sup> | IgM              | 1-3    | 4  | ARPKRSIAAAGIGNYFEY        | 10     | K           | 1-39  | 2     | QSYSSPGT     | 9         |                         |
|                   | SA3-267 <sup>(17)</sup> | IgA2             | 3-33   | 4  | AKRGDSCTGGVCSYFDY         | 10     | L           | 8-61  | 3     | VLYMGSGIWW   | 8         |                         |
|                   | SA3-269                 | IgM              | 3-48   | 6  | ARAWRGDGGGRPWRLDV         | 5      | L           | 6-57  | 3     | QSYDSSIHVV   | 2         |                         |
|                   | SA3-270                 | IgG1             | 3-33   | 3  | AKDRPDITMIVVGAFDI         | 0      | L           | 4-69  | 2     | QWGTGIKR     | 3         |                         |

| mAb expression ID | mAb clone ID             | Ig class isotype | VH   | JH | CDR H3                   | SHM VH | light chain | VK/VL | JK/JL | CDR K3/L3      | SHM VK/VL | criteria for expression |
|-------------------|--------------------------|------------------|------|----|--------------------------|--------|-------------|-------|-------|----------------|-----------|-------------------------|
|                   | SA3-274 <sup>(14)</sup>  | IgM              | 3-74 | 4  | VRGHSERYGKFED            | 8      | L           | 2-14  | 3     | SSYTRSSSWV     | 7         |                         |
|                   | SA3-278                  | IgM              | 3-23 | 4  | ANRIVGAPTGY              | 18     | K           | 2-30  | 2     | MQGTHWPYT      | 7         |                         |
|                   | SA3-279                  | IgG1             | 3-13 | 2  | VRAEYDSSGYYWYFDL         | 4      | K           | 1-39  | 2     | QQSYITPPEDT    | 2         |                         |
|                   | SA3-280                  | IgM              | 3-7  | 4  | ARQGNPNS                 | 8      | K           | 2-29  | 2     | MQGIQFPRT      | 16        |                         |
|                   | SA3-281                  | IgG1             | 1-69 | 5  | ARAVTIFGVVINWFDP         | 23     | L           | 2-8   | 1     | SSYAGSNHFYF    | 12        |                         |
|                   | SA3-284                  | IgG1             | 3-53 | 6  | ARWGPNDYDILTGYSPPHYGMDV  | 4      | K           | 1-5   | 3     | QQYNSYSL       | 8         |                         |
|                   | SA3-292                  | IgM              | 4-59 | 5  | ARMPGGFDP                | 2      | K           | 4-1   | 3     | QQYYSTPFT      | 1         |                         |
|                   | SA3-293                  | IgM              | 3-13 | 4  | ARANYDSSGYYSLFDY         | 1      | K           | 1-39  | 2     | QQSYSTLSYT     | 1         |                         |
|                   | SA3-297                  | IgG1             | 4-34 | 4  | ARGLDHAKSGT              | 31     | K           | 2-28  | 2     | ASSTNSVH       | 6         |                         |
|                   | SA3-302                  | IgG1             | 3-9  | 6  | AKGHSPLHQYYYGMDV         | 4      | L           | 2-8   | 3     | SSYAGTNNVA     | 13        |                         |
|                   | SA3-303K                 | IgM              | 1-69 | 5  | ARDTTVTTMGWFDP           | 1      | K           | 1-5   | 5     | QQYNSYST       | 1         |                         |
|                   | SA3-303L                 | IgM              | 1-69 | 5  | ARDTTVTTMGWFDP           | 1      | L           | 4-69  | 3     | QTWGTGIPDWV    | 3         |                         |
|                   | SA3-306                  | IgG1             | 5-51 | 4  | ARLALPRVISYCFDS          | 15     | K           | 1-33  | 4     | QHHDNLPLT      | 11        |                         |
|                   | SA3-308                  | IgA2             | 1-18 | 4  | ARWRGSYCDKTCQPFYD        | 21     | K           | 3-20  | 2     | QQYGSSTYT      | 11        |                         |
|                   | SA3-314                  | IgM              | 4-59 | 6  | ATYYYDSSGYNYGMDV         | 4      | K           | 1-39  | 1     | QQSYSIPLT      | 1         |                         |
|                   | SA3-316K <sup>(22)</sup> | IgM              | 3-13 | 2  | ARDISSWYFDL              | 2      | K           | 1-39  | 3     | QQSYSTPPIT     | 3         |                         |
|                   | SA3-316L                 | IgM              | 3-13 | 2  | ARDISSWYFDL              | 2      | L           | 2-23  | 3     | CSYAGSSTWV     | 2         |                         |
|                   | SA3-318                  | IgG2             | 1-46 | 5  | ARDWGRFMGQIDP            | 14     | K           | 3-15  | 1     | QQYKNWPRT      | 4         |                         |
|                   | SA3-324                  | IgA2             | 3-23 | 6  | AKGGVGTLSKTGMDV          | 17     | K           | 1-39  | 1     | EQSHSAPVT      | 16        |                         |
|                   | SA3-325                  | IgG2             | 3-9  | 6  | AKATLFHGYGLGYYYAMDV      | 9      | K           | 2-28  | 2     | MQUALQTPPST    | 12        |                         |
|                   | SA4-102                  | IgM              | 3-11 | 6  | THLRRRDGYNYYYGMDV        | 0      | L           | 1-44  | 3     | AAWDDSLNGPV    | 0         |                         |
|                   | SA4-105                  | IgG1             | 1-24 | 5  | ATLIGSCSETTCPRTPGGFDP    | 35     | L           | 2-23  | 3     | SSYAGGGLWV     | 26        |                         |
|                   | SA4-106L                 | IgM              | 1-8  | 3  | AREFVGSYWGGAAFDI         | 3      | L           | 2-14  | 3     | SSYTRSSSWV     | 7         |                         |
|                   | SA4-107                  | IgM              | 3-7  | 4  | ARGGSYWRY                | 6      | K           | 1-33  | 2     | QQFDNFPRT      | 12        |                         |
|                   | SA4-111                  | IgG1             | 4-4  | 6  | ARGPCCSSPHGMDV           | 14     | L           | 2-23  | 2     | AHMQVVALG      | 9         |                         |
|                   | SA4-114                  | IgM              | 3-33 | 4  | AKDSHYYGSGSYRYFDY        | 9      | L           | 1-51  | 3     | GTWDTLSLVVV    | 8         |                         |
|                   | SA4-115                  | IgM              | 4-39 | 5  | ARHLKRPESDWDFP           | 12     | L           | 1-44  | 3     | AAWDGGLNGPV    | 4         |                         |
|                   | SA4-116                  | IgM              | 5-51 | 3  | GRQGPYYYDSRGSVVGPRDEAFDI | 6      | L           | 1-40  | 3     | QSYDSSLSGWV    | 3         |                         |
|                   | SA4-118                  | IgG1             | 3-21 | 5  | ARGLKMTTVSSGAFDP         | 17     | L           | 2-8   | 3     | SSYAGNNHLV     | 10        |                         |
|                   | SA4-119                  | IgG2             | 3-11 | 4  | AKLLTGSSPFYD             | 27     | L           | 3-21  | 3     | QVWDGNSDWV     | 11        |                         |
|                   | SA4-121                  | IgA2             | 3-33 | 4  | AKDRGLGDTNDY             | 13     | K           | 1-27  | 4     | QKYNAPLT       | 8         |                         |
|                   | SA4-126 <sup>(8)</sup>   | IgG1             | 3-21 | 4  | ARAEYFDY                 | 17     | L           | 1-44  | 3     | AAWDDSLIGLG    | 10        |                         |
|                   | SA4-129                  | IgG1             | 4-39 | 4  | AKAVEGPVDF               | 22     | K           | 2-30  | 5     | ARYTLASDH      | 12        |                         |
|                   | SA4-133K                 | IgG1             | 3-23 | 6  | AKGPTSSGYYFGMDV          | 10     | K           | 3D-15 | 3     | QQYNNWGSFT     | 8         |                         |
|                   | SA4-133L                 | IgG1             | 3-23 | 6  | AKGPTSSGYYFGMDV          | 10     | L           | 6-57  | 3     | QSYDNINQSPWV   | 6         |                         |
|                   | SA4-134                  | n/d              | 3-23 | 6  | RKLLQCVAPLRIDV           | 41     | L           | 2-14  | 1     | SSYTSSTLYV     | 7         |                         |
|                   | SA4-135K                 | IgM              | 3-9  | 6  | AKDIRPYYYDSRDYYGMDV      | 1      | K           | 3-20  | 4     | QQYGSSTL       | 3         |                         |
|                   | SA4-135L                 | IgM              | 3-9  | 6  | AKDIRPYYYDSRDYYGMDV      | 1      | L           | 2-23  | 3     | CSYAGSSTWV     | 2         |                         |
|                   | SA4-136                  | IgG1             | 3-43 | 4  | AKDGVVATMGDYFDY          | 6      | L           | 3-21  | 3     | QVWDSSSDHWV    | 6         |                         |
|                   | SA4-139                  | IgA1             | 3-53 | 6  | ARDRAYYSGSPDDYYGLDV      | 18     | K           | 2-28  | 1     | MQLQTPPT       | 11        |                         |
|                   | SA4-140                  | IgM              | 3-30 | 4  | ARGRGSSTGSPFDY           | 14     | K           | 1-27  | 1     | QKYNAPWT       | 2         |                         |
|                   | SA4-145                  | IgM              | 3-23 | 6  | AKHSYEFSSYGMDV           | 16     | K           | 2-28  | 4     | MQUALQSRLT     | 3         |                         |
|                   | SA4-146                  | IgG1             | 3-30 | 4  | ARVGDYIALREYSYDY         | 10     | K           | 1-9   | 2     | QQFKSYPPS      | 11        |                         |
|                   | SA4-148                  | IgG1             | 3-11 | 6  | ARDERRVIRGRYGMDV         | 16     | L           | 1-51  | 3     | AIWDSRSLSTGRWV | 14        |                         |
|                   | SA4-149                  | IgM              | 5-51 | 3  | ARGPVVAATIPGAFDI         | 0      | K           | 3-20  | 4     | QQYGSALT       | 3         |                         |
|                   | SA4-150                  | IgG1             | 1-18 | 3  | ARVQHWNSYVDAFDI          | 28     | L           | 1-51  | 1     | GTWDDSLSAGL    | 13        |                         |
|                   | SA4-151                  | IgG2             | 3-30 | 6  | SRGAEGSGRYGSDVYVYVLDV    | 15     | L           | 1-40  | 3     | QSYDRTLGSGWV   | 15        |                         |
|                   | SA4-152                  | IgG2             | 4-59 | 5  | ARDWVSGNSHGYNWFDP        | 25     | K           | 3-11  | 1     | QQRYHWPT       | 12        |                         |

| mAb expression ID | mAb clone ID             | Ig class isotype | VH     | JH | CDR H3                | SHM VH | light chain | VK/VL | JK/JL | CDR K3/L3    | SHM VK/VL | criteria for expression |
|-------------------|--------------------------|------------------|--------|----|-----------------------|--------|-------------|-------|-------|--------------|-----------|-------------------------|
|                   | SA4-155                  | IgG3             | 3-33   | 4  | AKDPSGYDSGKTYFDY      | 5      | L           | 3-21  | 1     | QVWDSGSDPLYV | 7         |                         |
|                   | SA4-158                  | IgM              | 3-7    | 4  | ARDSPFRLWKDY          | 6      | K           | 3-15  | 4     | QQYNNWPLT    | 6         |                         |
|                   | SA4-159                  | IgM              | 1-46   | 4  | AKSGGFWSVDY           | 19     | L           | 2-8   | 1     | SSNAGSSNLV   | 9         |                         |
|                   | SA4-165                  | IgM              | 4-59   | 4  | ATHIVRPTTTFAS         | 12     | L           | 3-21  | 3     | QVWDSSSDHRV  | 2         |                         |
|                   | SA4-172                  | IgM              | 3-11   | 4  | ARAPRMSDY             | 8      | K           | 2-30  | 3     | MQGTHWPFT    | 3         |                         |
|                   | SA4-175                  | IgM              | 1-58   | 6  | AAARYGSGRLYYYGMDV     | 7      | K           | 4-1   | 1     | HQYYSTPWT    | 3         |                         |
|                   | SA4-189                  | IgM              | 3-7    | 6  | ARGGMVYALDYYGMDV      | 1      | L           | 1-47  | 3     | AAWDDSLSGWV  | 3         |                         |
|                   | SA4-194                  | IgG1             | 3-33   | 6  | RKIWRLWFGDLSLTATVWTS  | 11     | K           | 1-39  | 2     | NRVTVPRTL    | 5         |                         |
|                   | SA4-196K                 | IgM              | 3-74   | 5  | ARGYCSPSPCRPKGWFAP    | 8      | K           | 4-1   | 2     | QQYYNIPYT    | 8         |                         |
|                   | SA4-196L                 | IgM              | 3-74   | 5  | ARGYCSPSPCRPKGWFAP    | 8      | L           | 2-8   | 2     | SSYAGSNNLV   | 4         |                         |
|                   | SA4-199                  | IgG1             | 3-23   | 4  | AKITVTHFDC            | 3      | L           | 6-57  | 3     | QSYDSSNWV    | 0         |                         |
|                   | SA4-203 <sup>(10)</sup>  | IgM              | 3-74   | 4  | ARGGLSGEMSKWGY        | 5      | L           | 7-43  | 3     | LLYYGGPWV    | 5         |                         |
|                   | SA4-204                  | IgM              | 1-3    | 4  | ARAGGKWNYYDY          | 20     | L           | 2-14  | 2     | TSCTSSSTVL   | 11        |                         |
|                   | SA4-205                  | IgM              | 3-53   | 4  | ARSGGYSFDY            | 0      | L           | 2-23  | 3     | LICKVVALG    | 7         |                         |
|                   | SA4-207                  | IgM              | 3-48   | 3  | ATGLNNDSSADRYALHI     | 14     | L           | 1-44  | 3     | ATWDDSFNGWL  | 20        |                         |
|                   | SA4-211                  | IgM              | 4-38-2 | 4  | AGFCSGGDCSPFDY        | 4      | K           | 4-1   | 1     | QQYYSTPRT    | 5         |                         |
|                   | SA4-213                  | IgA1             | 3-48   | 4  | ARSGNYRIDY            | 21     | L           | 1-44  | 3     | AAWDDSPGTVV  | 10        |                         |
|                   | SA4-214 <sup>(14)</sup>  | IgM              | 3-74   | 4  | ASMWGTANDY            | 9      | L           | 2-14  | 3     | AHIQLAALG    | 17        |                         |
|                   | SA4-215                  | IgM              | 4-38-2 | 4  | ARARQGVFDY            | 7      | K           | 3-15  | 2     | RQYNNWPYT    | 10        |                         |
|                   | SA4-218 <sup>(14)</sup>  | IgM              | 3-74   | 4  | ARWAPEGD              | 15     | L           | 2-14  | 3     | TSYTKSSTWV   | 12        |                         |
|                   | SA4-219 <sup>(48)</sup>  | IgM              | 3-53   | 6  | ARGDKATDGMDV          | 1      | L           | 3-25  | 3     | QSADSSGTWV   | 4         |                         |
|                   | SA4-221                  | IgG1             | 5-51   | 3  | ARPPAYCGGDCPIGAFDI    | 5      | K           | 1-39  | 1     | QQSYSTRT     | 4         |                         |
|                   | SA4-223 <sup>(14)</sup>  | IgM              | 3-74   | 4  | ARGLQAGGGWGDN         | 9      | L           | 2-14  | 3     | ISYTTSSSTWV  | 5         |                         |
|                   | SA4-226                  | IgM              | 3-74   | 4  | ARGNSGFYD             | 13     | K           | 3-11  | 4     | QQRSNWPLT    | 11        |                         |
|                   | SA4-235                  | IgG1             | 3-30   | 4  | ARDRGGYDRSGYYTTLTYFDY | 3      | L           | 6-57  | 3     | QSYDSSNPSWV  | 2         |                         |
|                   | SA4-237                  | IgM              | 3-9    | 4  | AKDMGYDFWSTYNYFDY     | 3      | L           | 1-40  | 3     | QSYDSSLSGSV  | 1         |                         |
|                   | SA4-239                  | IgM              | 1-18   | 5  | ARVNRYSRPHWFDP        | 7      | L           | 2-14  | 1     | SSYSSSTYV    | 5         |                         |
|                   | SA4-240                  | IgG1             | 1-18   | 5  | ARDGELLAWFDP          | 5      | L           | 2-23  | 3     | CSYAGSSTWV   | 4         |                         |
|                   | SA4-241                  | IgM              | 4-4    | 3  | ARRDSSRYPI            | 4      | K           | 1-39  | 2     | QQIYSTPYT    | 12        |                         |
|                   | SA4-242                  | IgA1             | 4-34   | 4  | ARAFRAGLLSPLAY        | 44     | L           | 1-44  | 3     | ATWDDSFKWLA  | 17        |                         |
|                   | SA4-245                  | IgM              | 5-51   | 4  | ARHPPDCSGGSCPFYD      | 9      | L           | 6-57  | 2     | QSYDSSIVV    | 3         |                         |
|                   | SA4-246                  | IgM              | 4-39   | 4  | ARHNSGTYYRFYD         | 6      | L           | 2-14  | 1     | SSYSSNTRV    | 6         |                         |
|                   | SA4-247 <sup>(10)</sup>  | IgA1             | 3-74   | 4  | ARGGISGGMSTWAY        | 21     | L           | 7-43  | 3     | LLFFGAAWV    | 15        |                         |
|                   | SA4-248 <sup>(35)</sup>  | IgG1             | 4-39   | 4  | ARLRGSPRPGEYYFDY      | 5      | L           | 2-23  | 3     | CSYAGGSTWV   | 7         |                         |
|                   | SA4-249                  | IgM              | 3-74   | 4  | VRGTRDGVGAWV          | 12     | K           | 4-1   | 4     | HQHYSSSPT    | 11        |                         |
|                   | SA4-252                  | IgM              | 3-48   | 3  | ARGAARAFDI            | 14     | L           | 8-61  | 3     | VLYMGSGI WV  | 4         |                         |
|                   | SA4-253                  | IgM              | 3-23   | 4  | AKEGAYCGGDCLYYFDY     | 3      | K           | 2-28  | 5     | MQALQTPIT    | 1         |                         |
|                   | SA4-254                  | IgG1             | 5-51   | 6  | ARLDYGDYNYGMDV        | 7      | K           | 1-9   | 5     | NSLIVTPP     | 4         |                         |
|                   | SA4-255                  | IgA2             | 3-7    | 4  | AKGPLGSGY             | 5      | L           | 2-8   | 1     | SSFAGSNSFV   | 15        |                         |
|                   | SA4-256                  | IgG2             | 3-30   | 4  | ARGRDYFVYSAIEY        | 26     | L           | 8-61  | 3     | ALYIGAVNWV   | 23        |                         |
|                   | SA4-259                  | IgG1             | 4-4    | 5  | ARDSGIRGYNYPGP        | 30     | K           | 1-5   | 2     | QQYKSSPYT    | 26        |                         |
|                   | SA4-262                  | IgM              | 3-7    | 4  | ARAGSPAARDY           | 4      | L           | 2-8   | 3     | SSYAGSNSLV   | 7         |                         |
|                   | SA4-264                  | IgG1             | 3-11   | 4  | AREHGTGYSSYFDY        | 7      | L           | 1-40  | 3     | QSYDSSLSGWV  | 1         |                         |
|                   | SA4-265K                 | IgM              | 3-74   | 4  | ARGGVSGEMSNWAY        | 18     | K           | 2D-30 | 1     | CKVHTGGR     | 10        |                         |
|                   | SA4-265L <sup>(10)</sup> | IgM              | 3-74   | 4  | ARGGVSGEMSNWAY        | 18     | L           | 7-43  | 3     | LLFFGDAWV    | 12        |                         |
|                   | SA4-266K                 | IgM              | 4-59   | 6  | ARDKGFDFWSRYSWDYALDV  | 14     | K           | 4-1   | 2     | QQYYTSPMYT   | 13        |                         |
|                   | SA4-266L                 | IgM              | 4-59   | 6  | ARDKGFDFWSRYSWDYALDV  | 14     | L           | 2-8   | 3     | SSYAGTNNVA   | 13        |                         |
|                   | SA4-276 <sup>(14)</sup>  | IgM              | 3-74   | 4  | ARASSYSYGYFDY         | 0      | L           | 2-14  | 3     | SSYSSSTWV    | 2         |                         |

| mAb expression ID | mAb clone ID            | Ig class isotype | VH    | JH | CDR H3                  | SHM VH | light chain | VK/VL | JK/JL | CDR K3/L3     | SHM VK/VL | criteria for expression |
|-------------------|-------------------------|------------------|-------|----|-------------------------|--------|-------------|-------|-------|---------------|-----------|-------------------------|
|                   | SA4-278                 | IgM              | 1-3   | 4  | ARRDFYGSFSFHLGYGY       | 5      | K           | 2-28  | 4     | MQALQTPLT     | 3         |                         |
|                   | SA4-280                 | IgM              | 4-59  | 4  | ARGSIAVAGFDY            | 1      | L           | 1-44  | 3     | N/A           | 8         |                         |
|                   | SA4-283                 | IgM              | 3-7   | 4  | ARGGGVTFDN              | 10     | L           | 2-11  | 3     | CSYAGSHTWV    | 11        |                         |
|                   | SA4-287                 | IgG1             | 4-59  | 5  | VGKVNAGAFWFDP           | 25     | L           | 2-14  | 3     | SSYTRANTWV    | 19        |                         |
|                   | SA4-289                 | IgM              | 7-4-1 | 4  | ARRGYCSSISCLGH          | 6      | L           | 2-8   | 2     | SSHAGSNNVV    | 6         |                         |
|                   | SA4-299                 | IgG1             | 4-59  | 4  | ASYYYDSSGYHYGFDY        | 0      | K           | 1-39  | 3     | QQSYSTPFT     | 7         |                         |
|                   | SA4-302 <sup>(10)</sup> | IgM              | 3-74  | 4  | ARGGVSGEMSNWAY          | 17     | L           | 7-43  | 3     | LLFFGDAWV     | 9         |                         |
|                   | SA4-309                 | IgM              | 5-51  | 6  | ARLHYDFQYGLDV           | 9      | K           | 3-15  | 1     | QQYKNWPRT     | 5         |                         |
|                   | SA4-310K                | IgM              | 4-31  | 6  | AALAAAGTYSYYYGMDV       | 1      | K           | 1-39  | 4     | QQSYSTLT      | 1         |                         |
|                   | SA4-310L                | IgM              | 4-31  | 6  | AALAAAGTYSYYYGMDV       | 1      | L           | 1-51  | 3     | GTWSSLSAGV    | 5         |                         |
|                   | SA4-312                 | IgM              | 3-11  | 4  | ARGLLADYGDYVYFDY        | 0      | L           | 1-47  | 1     | AAWDDSLSGYV   | 1         |                         |
|                   | SA4-313                 | IgG2             | 3-11  | 6  | AREVYEFSGGAMDV          | 23     | L           | 2-14  | 1     | SSFTSSDTLV    | 14        |                         |
|                   | SA4-315                 | IgM              | 3-23  | 6  | AKGMGSGLDV              | 20     | L           | 1-51  | 3     | GTWSSLSAGV    | 5         |                         |
|                   | SA4-321                 | IgM              | 3-7   | 6  | GRAMQV                  | 11     | L           | 1-44  | 3     | AAWDDSLSRWV   | 10        |                         |
|                   | SA4-323                 | IgG2             | 6-1   | 4  | ARGWLRSQDFEY            | 18     | L           | 2-8   | 2     | SSYAGSSYLL    | 11        |                         |
|                   | SA4-326 <sup>(35)</sup> | IgG1             | 4-39  | 4  | ARVVRYSRGGGLDY          | 5      | L           | 2-23  | 3     | CSYAGSSTLV    | 2         |                         |
|                   | SA5-124                 | IgG1             | 1-8   | 4  | ARAPGFGESHNDY           | 3      | L           | 3-21  | 1     | QVWEGSGDHVY   | 8         |                         |
|                   | SA5-125 <sup>(19)</sup> | IgM              | 3-13  | 2  | ARVRPTMTKGFWDYFDL       | 2      | K           | 1-39  | 1     | QQSYNTLGT     | 6         |                         |
|                   | SA5-128                 | IgG1             | 3-30  | 6  | AKTSGSYYYYYGMVDV        | 4      | L           | 2-14  | 1     | SSYTSSTSYV    | 3         |                         |
|                   | SA5-130                 | IgG1             | 3-23  | 2  | AKGSQGYDRSGYYLHDWYFDL   | 5      | L           | 1-40  | 2     | QSYDSSLSGLNVV | 4         |                         |
|                   | SA5-131                 | IgG1             | 3-15  | 4  | TTDELYSGYEDPGDY         | 1      | K           | 1-5   | 3     | QQYNSYIFT     | 0         |                         |
|                   | SA5-132 <sup>(15)</sup> | IgG1             | 3-13  | 6  | ARGVVTMVRGLTYYYYYMDV    | 4      | K           | 1-39  | 1     | QQSYSSSEWT    | 1         |                         |
|                   | SA5-137 <sup>(5)</sup>  | IgG1             | 4-39  | 5  | VRLRGAVRPGVPANWFDP      | 8      | K           | 1-9   | 3     | QLNSYPLT      | 2         |                         |
|                   | SA5-139                 | IgG1             | 3-21  | 4  | ARDPYLEPGIKVAVY         | 2      | L           | 6-57  | 3     | QSYDSSNHVW    | 0         |                         |
|                   | SA5-140 <sup>(19)</sup> | IgM              | 3-13  | 2  | ARVRPTMTKGFDSYFDL       | 36     | K           | 1-39  | 1     | QQSYNTLGT     | 5         |                         |
|                   | SA5-144 <sup>(18)</sup> | IgG1             | 3-13  | 6  | ARALYGSYSTQAGYYYGMDV    | 3      | K           | 1-39  | 3     | NRVTGPSL      | 1         |                         |
|                   | SA5-146                 | IgM              | 4-59  | 4  | ARGGSNTWQLIFDY          | 13     | K           | 4-1   | 5     | QQYYSTPLT     | 11        |                         |
|                   | SA5-150                 | IgG1             | 4-39  | 4  | ARHSAQYSYDYFDY          | 3      | K           | 1-33  | 4     | QQYDNLPPNT    | 0         |                         |
|                   | SA5-152                 | IgM              | 3-23  | 4  | AKDPAVTIFGESDY          | 0      | L           | 5-52  | 3     | GTWHSNSKTHEE  | 1         |                         |
|                   | SA5-154                 | IgG1             | 3-21  | 3  | ARGGIGYYDSSGYWAAPDDAFDI | 1      | L           | 1-40  | 2     | QSYDSSLSGHVV  | 1         |                         |
|                   | SA5-158                 | IgG1             | 3-15  | 3  | TTELEWLLLEDDAFDI        | 0      | K           | 3-20  | 5     | QQYGSSPSIT    | 1         |                         |
|                   | SA5-167                 | IgG1             | 3-30  | 6  | AKDPSGGCYSSGCYYYYGLDV   | 4      | L           | 2-18  | 1     | ASYSKITFV     | 25        |                         |
|                   | SA5-171 <sup>(20)</sup> | IgM              | 3-23  | 4  | AKDFVVVAARSHDDYFDY      | 3      | K           | 1-5   | 4     | QQYKNFPLT     | 33        |                         |
|                   | SA5-173 <sup>(19)</sup> | IgM              | 3-13  | 2  | ARVRPTMTKGFWDYFDL       | 0      | K           | 1-39  | 1     | QQSYNTLGT     | 5         |                         |
|                   | SA5-174K                | IgA1             | 3-23  | 6  | AKCIQLYYYGMDV           | 3      | K           | 2-28  | 2     | MQALQTPPNT    | 3         |                         |
|                   | SA5-174L                | IgA1             | 3-23  | 6  | AKCIQLYYYGMDV           | 3      | L           | 2-8   | 3     | SSYAGTNNVA    | 13        |                         |
|                   | SA5-175 <sup>(23)</sup> | IgG2             | 3-30  | 6  | AKGDDYGDLFYYGMDV        | 1      | K           | 2-28  | 4     | MQALQRTLT     | 1         |                         |
|                   | SA5-180                 | IgM              | 3-30  | 6  | AKDRHTASPPHYGYGMDV      | 4      | K           | 4-1   | 4     | QQYYSTPLT     | 4         |                         |
|                   | SA5-187 <sup>(4)</sup>  | IgM              | 4-39  | 5  | ARHSSSPTSNEWFPD         | 4      | L           | 1-51  | 3     | GTWSSSLNAGV   | 3         |                         |
|                   | SA5-190                 | IgG2             | 4-39  | 3  | TRHQSSRPGLDALIS         | n/d    | K           | 3-15  | 1     | QQYKNWPRT     | 2         |                         |
|                   | SA5-194                 | IgA1             | 3-48  | 4  | AREGYYSGFYD             | 19     | L           | 2-14  | 3     | SSYRTDYTWV    | 12        |                         |
|                   | SA5-196 <sup>(5)</sup>  | IgG1             | 4-39  | 5  | ARLGAVRPGVPANWFDP       | 10     | K           | 1-9   | 3     | QLNSYPLT      | 0         |                         |
|                   | SA5-197                 | IgG1             | 1-3   | 4  | AREEVYCSGGSCSYRELDY     | 2      | K           | 1-33  | 2     | QQYDNLN       | 0         |                         |
|                   | SA5-198                 | IgG1             | 3-13  | 5  | ARAEHYCSGGRCYSWFDP      | 2      | K           | 1-39  | 2     | QQSYITTLTYT   | 7         |                         |
|                   | SA5-202                 | IgG1             | 3-9   | 4  | AKDRHYDSSGYLTSGIDY      | 4      | K           | 1-39  | 1     | QQNYITPPA     | 2         |                         |
|                   | SA5-208                 | IgG1             | 3-23  | 6  | AKDSSSWYYGMDV           | 0      | K           | 1-12  | 4     | QQANSFPLT     | 2         |                         |
|                   | SA5-209 <sup>(23)</sup> | IgG2             | 3-30  | 6  | AKGDDYGDLFYYGMDV        | 1      | K           | 2-28  | 4     | MQALQRTLT     | 1         |                         |
|                   | SA5-210                 | IgG1             | 5-51  | 1  | ETEGDCSGSSCYLVQILPA     | 56     | K           | 1-33  | 3     | QQYDNLNLPIT   | 1         |                         |

| mAb expression ID | mAb clone ID            | Ig class isotype | VH    | JH | CDR H3                    | SHM VH | light chain | VK/VL | JK/JL | CDR K3/L3     | SHM VK/VL | criteria for expression |
|-------------------|-------------------------|------------------|-------|----|---------------------------|--------|-------------|-------|-------|---------------|-----------|-------------------------|
|                   | SA5-215                 | IgM              | 3-30  | 6  | AKDGGAGVRGVKDYGGMDV       | 1      | L           | 1-47  | 1     | AAWDDSLSGYV   | 0         |                         |
|                   | SA5-220                 | IgG3             | 1-69  | 6  | ARDNPGVRGVPSYYYGGMDV      | 2      | K           | 1-33  | 3     | QQYDNLLS      | 3         |                         |
|                   | SA5-221 <sup>(21)</sup> | IgG1             | 4-39  | 5  | ARLTPQAPGVVWFDP           | 2      | L           | 2-23  | 2     | CSYAGSSTYVV   | 2         |                         |
|                   | SA5-225                 | IgM              | 3-15  | 1  | TTDRGTSWSNPPFQH           | 12     | K           | 2-30  | 4     | MQGTHCSL      | 1         |                         |
|                   | SA5-239                 | IgG1             | 4-39  | 5  | ARVRGGYCSGGSCYPGGDIDP     | 14     | L           | 2-8   | 2     | AHMQAALW      | 5         |                         |
|                   | SA5-243                 | IgG1             | 4-61  | 5  | AKVVAATPFSSWFDP           | 2      | K           | 3-11  | 2     | QQRSNWPEVYT   | 2         |                         |
|                   | SA5-244 <sup>(20)</sup> | IgM              | 3-23  | 4  | AKDFVVVAARSHDDYDFDY       | 5      | K           | 1-5   | 4     | QQYNRFPLT     | 2         |                         |
|                   | SA5-247 <sup>(15)</sup> | IgG1             | 3-13  | 6  | ARGVAVREDLYYYYMDV         | 2      | K           | 1-39  | 1     | QESYSNPSWT    | 7         |                         |
|                   | SA5-249                 | IgM              | 3-23  | 1  | AKDGEQQILWGYFQQ           | 23     | K           | 2-30  | 2     | IQGTHWRGL     | 17        |                         |
|                   | SA5-254                 | IgM              | 4-34  | 6  | ARVTGYYYYMDV              | 4      | K           | 1-39  | 5     | QQSYTTLIT     | 6         |                         |
|                   | SA5-255                 | IgM              | 4-39  | 4  | AREAGPLGPIYYDSSGYSD       | 3      | K           | 3-15  | 2     | QQFNNWPRT     | 3         |                         |
|                   | SA5-257                 | IgM              | 4-39  | 4  | ARTGMGSIVWSY              | 11     | K           | 3-20  | 4     | QQYDSSPLT     | 9         |                         |
|                   | SA5-261                 | IgG1             | 3-48  | 4  | ARGPSEMATIFFDY            | 5      | K           | 3-11  | 5     | QQRSNWPIT     | 4         |                         |
|                   | SA6-102                 | IgG1             | 3-43D | 4  | AKDTPYGGSGVDY             | 4      | K           | 1-33  | 4     | QQYDNLPPGLT   | 29        |                         |
|                   | SA6-103                 | IgG1             | 3-49  | 4  | TRDLVGGYCSGGSCYETYYFDY    | 0      | K           | 3-20  | 2     | QQYGSSPGT     | 5         |                         |
|                   | SA6-104                 | IgM              | 4-34  | 4  | ALRNVVVAADY               | 3      | K           | 1-39  | 2     | QQSYSTPRT     | 1         |                         |
|                   | SA6-107                 | IgM              | 1-3   | 5  | ARDGSVGYDSSGYFNGDNWFDP    | 4      | L           | 1-40  | 2     | QSYDSSLGSSVV  | 1         |                         |
|                   | SA6-111                 | IgG1             | 1-18  | 4  | ALSYRGGWYDFDY             | 2      | L           | 6-57  | 3     | QSYDSSIT      | 3         |                         |
|                   | SA6-112 <sup>(36)</sup> | IgM              | 4-39  | 5  | ARGGDILTGYDWFDP           | 4      | L           | 1-40  | 2     | QSYDSSLGSSYVV | 1         |                         |
|                   | SA6-115                 | IgG1             | 3-7   | 4  | AREPTYHHGSGADY            | 1      | K           | 3-11  | 1     | QQRSNWPPWT    | 4         |                         |
|                   | SA6-117                 | IgG1             | 1-46  | 4  | ARGYSSSQLIWNFGY           | 1      | L           | 1-47  | 1     | AAWDDSLSGPVL  | 2         |                         |
|                   | SA6-119 <sup>(36)</sup> | IgG1             | 4-39  | 5  | ARGGDILTGYDWFDP           | 5      | L           | 1-40  | 2     | QSYDSSLGSSYVV | 5         |                         |
|                   | SA7-155                 | IgG1             | 3-30  | 6  | AKDLAPVPEYYYGGMDV         | 6      | L           | 1-44  | 3     | AAWDDSLNGV    | 2         |                         |
|                   | SA7-156                 | IgG1             | 1-69  | 4  | ARELYTYGPPHY              | 22     | L           | 1-44  | 3     | ATWDDTRNGWV   | 13        |                         |
|                   | SA7-157 <sup>(7)</sup>  | IgM              | 3-30  | 6  | AKDRSVGATTSQSHYYYGGMDV    | 9      | L           | 1-51  | 2     | GTWESSLNTGV   | 12        |                         |
|                   | SA7-159 <sup>(38)</sup> | IgM              | 3-23  | 4  | AKDSGIWGTEVAGTNDY         | 9      | K           | 4-1   | 2     | SNIIILRTL     | 7         |                         |
|                   | SA7-162 <sup>(37)</sup> | IgM              | 3-7   | 3  | ARDRAREYYYDSSGYYSDAFDM    | 4      | L           | 3-1   | 2     | QAWDSSPV      | 11        |                         |
|                   | SA7-163                 | IgG1             | 1-18  | 3  | ARGRTLGAATDAFDV           | 13     | K           | 2-28  | 5     | MQALQTPLT     | 4         |                         |
|                   | SA7-166 <sup>(38)</sup> | IgM              | 3-23  | 4  | AKDSGIWGTEVAGTNDY         | 12     | K           | 4-1   | 2     | QQYTPPYT      | 9         |                         |
|                   | SA7-167 <sup>(38)</sup> | IgM              | 3-23  | 4  | AKDSGIWGTEVAGTNDY         | 8      | K           | 4-1   | 2     | QQYTPPYT      | 10        |                         |
|                   | SA7-169 <sup>(38)</sup> | IgM              | 3-23  | 4  | AKDSGIWGTEVAGTNDY         | 12     | K           | 4-1   | 2     | SNITLPRTL     | 11        |                         |
|                   | SA7-171 <sup>(7)</sup>  | IgM              | 3-30  | 6  | AKDRSVGATTSQSHYYYGGMDV    | 5      | L           | 1-51  | 2     | GTWESSLSTGV   | 5         |                         |
|                   | SA7-174                 | IgG3             | 3-30  | 4  | ARDWQQLVTLFDY             | 5      | K           | 1-39  | 1     | TELQYPSVD     | 4         |                         |
|                   | SA7-175K                | n/d              | 5-51  | 4  | QRLPSQKETSMEADLT          | 36     | K           | 4-1   | 2     | QQYSTPPYT     | 3         |                         |
|                   | SA7-175L                | n/d              | 5-51  | 4  | QRLPSQKETSMEADLT          | 36     | L           | 2-14  | 3     | SSYSSSTLG     | 11        |                         |
|                   | SA7-178 <sup>(37)</sup> | IgM              | 3-7   | 3  | ARDRAREYYYDSSGYYSDAFDM    | 4      | L           | 3-1   | 2     | QAWDSSPV      | 11        |                         |
|                   | SA7-179                 | IgM              | 1-18  | 6  | ARGEGPIYYDRSGYLLADYYGGMDV | 6      | K           | 1-27  | 1     | QKYNAPQT      | 2         |                         |
|                   | SA7-180 <sup>(38)</sup> | IgM              | 3-23  | 4  | AKDSGIWGTEVAGTNDY         | 12     | K           | 4-1   | 2     | QQYTPPYT      | 15        |                         |
|                   | SA8-101 <sup>(39)</sup> | IgG1             | 4-59  | 4  | ARDLKGTTTCYDF             | 23     | K           | 1-33  | 5     | N/A           | 13        |                         |
|                   | SA8-103                 | IgG1             | 3-7   | 2  | ARKESDFWSGYINWYFDL        | 0      | K           | 3-11  | 4     | QQRSNWPP      | 3         |                         |
|                   | SA8-106                 | IgM              | 5-51  | 4  | ARHRTESGQLELDY            | 0      | L           | 1-47  | 2     | AAWDDSLSGPV   | 0         |                         |
|                   | SA8-108                 | IgM              | 5-51  | 4  | ARHGIAVAGTVVPDY           | 0      | L           | 1-44  | 2     | AAWDDSLNGPV   | 0         |                         |
|                   | SA8-114 <sup>(40)</sup> | IgM              | 4-59  | 6  | ARDPGTWMYYYDGGMDV         | 16     | K           | 1-33  | 4     | RH            | 18        |                         |
|                   | SA8-119                 | IgG1             | 7-4-1 | 6  | ARAQADSSGWLYGYYYGGMDV     | 2      | K           | 1-17  | 3     | LQHNSYPH      | 5         |                         |
|                   | SA8-133                 | IgG1             | 4-39  | 5  | ARHSVVPAGDWFDP            | 5      | K           | 1-5   | 2     | QQYNSYSCS     | 4         |                         |
|                   | SA8-140 <sup>(40)</sup> | IgM              | 4-59  | 6  | ARDPGTWMYYYDGGMDV         | 15     | K           | 1-33  | 4     | RH            | 17        |                         |
|                   | SA8-142K                | IgG1             | 1-24  | 6  | ATDRKYYYYGGMDV            | 4      | K           | 1-16  | 1     | QQYNSYPLT     | 5         |                         |
|                   | SA8-142L                | IgG1             | 1-24  | 6  | ATDRKYYYYGGMDV            | 4      | L           | 3-21  | 3     | QVWDRNDHWV    | 20        |                         |



| mAb expression ID | mAb clone ID             | Ig class isotype | VH     | JH | CDR H3                                           | SHM VH | light chain | VK/VL | JK/JL | CDR K3/L3     | SHM VK/VL | criteria for expression |
|-------------------|--------------------------|------------------|--------|----|--------------------------------------------------|--------|-------------|-------|-------|---------------|-----------|-------------------------|
|                   | SA8-143                  | IgM              | 3-23   | 3  | AKDVGYCSSTSCPKAFDI                               | 1      | K           | 1-33  | 3     | QQYDNLPRLDFT  | 0         |                         |
|                   | SA8-145 <sup>(39)</sup>  | IgG1             | 4-59   | 4  | ARDLKGTTTCYDY                                    | 22     | K           | 1-33  | 4     | QQYGNLPAH     | 17        |                         |
|                   | SA8-146 <sup>(40)</sup>  | IgM              | 4-59   | 6  | ARDPGTWMYYYYDGMDV                                | 14     | K           | 1-33  | 4     | RH            | 18        |                         |
|                   | SA8-147 <sup>(40)</sup>  | IgM              | 4-59   | 6  | ARDPGTWMYYYYDGMDV                                | 16     | K           | 1-33  | 4     | RH            | 16        |                         |
|                   | SA8-148 <sup>(25)</sup>  | IgM              | 3-66   | 6  | ARDLAVYGVVDV                                     | 3      | L           | 3-21  | 2     | QVWDSSSDHPVV  | 0         |                         |
|                   | SA8-150                  | IgM              | 3-48   | 6  | ARAITILWYGMDV                                    | 2      | L           | 2-23  | 1     | CSYAGSSTFYV   | 3         |                         |
|                   | SA9-183                  | IgG1             | 1-2    | 6  | ARVDTTGTTFWLYYYYGMDV                             | 0      | K           | 3-11  | 3     | HQRSNWPFT     | 6         |                         |
|                   | SA9-184                  | IgM              | 3-7    | 6  | ARAWGALGYDSSGGYYYDYSYYGMDV                       | 5      | L           | 2-14  | 2     | SSYTSSSGV     | 9         |                         |
|                   | SA9-186                  | IgM              | 3-7    | 5  | REGGAPGAT                                        | 18     | K           | 3-20  | 4     | QQYDRFSLT     | 11        |                         |
|                   | SA9-187                  | IgG2             | 4-61   | 2  | ARDSNTGWFGQNWYFDL                                | 17     | L           | 2-14  | 2     | SSFTSITTHVI   | 9         |                         |
|                   | SA9-188                  | IgG1             | 1-69   | 5  | ARGGLWFGELLWFDP                                  | 0      | K           | 1-39  | 1     | QQSYSTPWT     | 6         |                         |
|                   | SA9-189                  | IgM              | 4-34   | 2  | ARGKAIFGVVVIWYFDL                                | 4      | K           | 1-39  | 2     | QQSYSTPYT     | 3         |                         |
|                   | SA9-191                  | IgM              | 4-34   | 6  | ARVGYSGYPHGLGLYYYYGMDV                           | 8      | K           | 1-39  | 1     | QQSYSTPWT     | 9         |                         |
|                   | SA9-192                  | IgA1             | 4-31   | 4  | ARLVVPAGFAYYFDY                                  | 1      | L           | 1-51  | 2     | GTWDSSLSAVV   | 2         |                         |
|                   | SA9-195                  | IgG1             | 3-30   | 4  | ASPPQGGYDWWVDY                                   | 3      | L           | 2-11  | 3     | CSYAGTNWV     | 3         |                         |
|                   | SA9-197                  | IgG1             | 5-51   | 4  | ARQAVGATGDFDY                                    | 0      | L           | 6-57  | 2     | QSYDSSNHVV    | 1         |                         |
|                   | SA9-200                  | IgG1             | 3-48   | 6  | ASNVVNGFRNYYGMDV                                 | 1      | K           | 3-20  | 1     | QQYGSSPWT     | 6         |                         |
|                   | SA9-201                  | IgA1             | 3-49   | 4  | TRAVFCTSTDCYVGTGGHFDY                            | 19     | K           | 1-27  | 3     | QKCNSAPQT     | 18        |                         |
|                   | SA9-202                  | IgM              | 3-30   | 4  | ARGYTGSTEGC                                      | 12     | K           | 3-20  | 2     | QQYNSSPYT     | 17        |                         |
|                   | SA9-203                  | IgG1             | 4-30-4 | 6  | AGGVWGRGLPAWGPETLLFSLWIHLHL<br>HQGPIGLPPGTLQGAPS | 1      | L           | 1-51  | 2     | GTWDSSLSAGRVV | 5         |                         |
|                   | SA9-205                  | IgM              | 3-23   | 5  | AKAGTSSSYGLSWFDL                                 | 19     | L           | 2-14  | 1     | SSYTSSNTLV    | 6         |                         |
|                   | SA10-102                 | IgG1             | 5-51   | 4  | ARGIAVAGAPYFDY                                   | 0      | L           | 1-44  | 1     | AAWDDSLNGYV   | 0         |                         |
|                   | SA10-103                 | IgG1             | 3-15   | 4  | TTSGSYYYDSSGPTDDFDY                              | 0      | K           | 4-1   | 1     | SNIIVLRGR     | 3         |                         |
|                   | SA10-104K                | IgM              | 3-20   | 4  | ARHDSSGYHPPGDY                                   | 0      | K           | 1-5   | 2     | QQYDSYTT      | 8         |                         |
|                   | SA10-104L                | IgM              | 3-20   | 4  | ARHDSSGYHPPGDY                                   | 0      | L           | 2-23  | 2     | CSYAGSSTSHVV  | 2         |                         |
|                   | SA10-106                 | IgM              | 4-59   | 5  | ARDHPPYLKLRP                                     | 1      | L           | 2-8   | 1     | SSYAGSNNFA    | 2         |                         |
|                   | SA10-108                 | IgG1             | 4-39   | 1  | ARHPDGDYHAEYFQH                                  | 1      | K           | 3-15  | 1     | QQHKNCPRT     | 9         |                         |
|                   | SA10-112                 | IgG1             | 3-15   | 4  | TTDITIFGVVIGGFDY                                 | 4      | L           | 6-57  | 2     | QSYDSSNGDVV   | 0         |                         |
|                   | SA10-113                 | IgG1             | 1-69   | 3  | ARAVEMATINDAFDI                                  | 1      | L           | 2-8   | 1     | SSHAGSDTPFV   | 16        |                         |
|                   | SA10-114                 | IgM              | 1-58   | 4  | AAEGGSYVLVTGLTT                                  | 1      | L           | 2-14  | 2     | SSYTSSSVV     | 2         |                         |
|                   | SA10-116                 | IgM              | 3-15   | 2  | VKFGDCPRYFDL                                     | 13     | K           | 1-33  | 1     | QQSDNPPRT     | 13        |                         |
|                   | SA10-117                 | IgG1             | 3-21   | 6  | ASGGYCSGGSCPPFVYYYYGMDV                          | 0      | K           | 1-27  | 1     | KSITVPPGR     | 3         |                         |
|                   | SA10-118                 | IgA1             | 3-7    | 4  | VRALGSGSY                                        | 10     | L           | 1-44  | 1     | AAWDDSLSGFV   | 7         |                         |
|                   | SA10-119                 | IgM              | 4-61   | 4  | ARDRAARPGSDYFDY                                  | 0      | L           | 1-51  | 2     | GTWDSSLSAGV   | 4         |                         |
|                   | SA10-123                 | IgG1             | 3-21   | 4  | ARIPAGYSGYDYDYFDY                                | 0      | L           | 2-14  | 3     | SSYTSSSTR     | 5         |                         |
|                   | SA10-125 <sup>(6)</sup>  | IgG3             | 1-58   | 3  | AAPNCSSGGSCYDAFDI                                | 0      | K           | 3-20  | 1     | QQYGSSPWT     | 2         |                         |
|                   | SA10-127                 | IgG1             | 3-23   | 3  | AKDLGDYRSFGAFDI                                  | 0      | L           | 2-8   | 1     | SSYAGSFYV     | 2         |                         |
|                   | SA10-128                 | IgM              | 1-2    | 4  | ERSLWFGIRL                                       | 17     | K           | 4-1   | 2     | QQYTTTPNT     | 12        |                         |
|                   | SA10-131                 | IgM              | 1-18   | 4  | ARVPYDSSGYTVFEYFFDY                              | 2      | L           | 1-40  | 2     | QSYDSSLSGDVV  | 1         |                         |
|                   | SA10-135                 | IgM              | 5-51   | 4  | ARAITFGGVIEFDY                                   | 0      | L           | 1-47  | 2     | AAWDDSLSGVV   | 0         |                         |
|                   | SA10-144                 | IgG1             | 1-18   | 6  | ARFFVTMVQGENYYYYGMDV                             | 1      | L           | 9-49  | 2     | GADHGSGSNFVVV | 1         |                         |
|                   | SA10-147                 | IgM              | 1-18   | 5  | ARTAVTNWFDP                                      | 9      | K           | 1-12  | 4     | QQANSFPRT     | 7         |                         |
|                   | SA13-136                 | IgM              | 3-9    | 6  | AKDIGHIREGYGMDV                                  | 1      | L           | 2-14  | 2     | SSYTSSSTLV    | 2         |                         |
|                   | SA13-137                 | IgG1             | 3-9    | 4  | AKDITGSYGDFDY                                    | 1      | L           | 3-21  | 1     | QVWDSSGDHYV   | 3         |                         |
|                   | SA13-140 <sup>(15)</sup> | IgG3             | 3-13   | 6  | ARGSDSSGGYYYVRSYYYYYMDV                          | 0      | K           | 1-39  | 1     | NRVTVPPPPGR   | 5         |                         |
|                   | SA13-143 <sup>(41)</sup> | IgG1             | 4-61   | 5  | AREVAPTPLIWFDP                                   | 1      | L           | 2-14  | 2     | SSYTSSSTDVV   | 4         |                         |
|                   | SA13-149                 | IgA2             | 4-61   | 4  | ARVPVGGSDYFFDY                                   | 3      | K           | 3-15  | 1     | QQYKNWPRT     | 4         |                         |

| mAb expression ID | mAb clone ID             | Ig class isotype | VH   | JH | CDR H3                  | SHM VH | light chain | VK/VL | JK/JL | CDR K3/L3   | SHM VK/VL | criteria for expression |
|-------------------|--------------------------|------------------|------|----|-------------------------|--------|-------------|-------|-------|-------------|-----------|-------------------------|
|                   | SA13-150                 | IgM              | 4-39 | 4  | ARHGVGQQLVVGEYYFDY      | 3      | L           | 2-23  | 3     | CSYAGSSTWV  | 3         |                         |
|                   | SA13-151 <sup>(41)</sup> | IgG1             | 4-61 | 5  | AREVAPTGLIWFDP          | 1      | L           | 2-14  | 2     | SSYTSSSTDVV | 4         |                         |
|                   | SA13-154 <sup>(41)</sup> | IgG1             | 4-61 | 5  | AREVAPTGLIWFDP          | 1      | L           | 2-14  | 2     | SSYTSSSTDVV | 4         |                         |
|                   | SA13-161 <sup>(3)</sup>  | IgM              | 5-51 | 6  | ARSASGSYGGYYYYYMDV      | 0      | L           | 1-44  | 3     | AAWDDSLNGPV | 0         |                         |
|                   | SA14-168                 | IgM              | 1-69 | 2  | ARDLYVGDVNNHGGYFDL      | 0      | K           | 3-11  | 1     | QQRSNWPRT   | 0         |                         |
|                   | SA14-170 <sup>(51)</sup> | IgM              | 4-31 | 5  | ARRREYSSTSWFDP          | 16     | L           | 1-51  | 3     | GTWDNSLSAWV | 7         |                         |
|                   | SA14-172 <sup>(24)</sup> | IgM              | 3-48 | 4  | VRVGHPDTLFAVDY          | 13     | K           | 3-15  | 2     | QQYNNWPRYS  | 4         |                         |
|                   | SA14-174                 | IgM              | 4-39 | 4  | ARHRSGSYGRDYFDY         | 1      | L           | 1-51  | 2     | GTWDSSLTHVV | 2         |                         |
|                   | SA14-175 <sup>(24)</sup> | IgG1             | 3-48 | 4  | VRVGHPDTLFGVDY          | 11     | K           | 3-15  | 2     | QQYNNWPRYS  | 6         |                         |
|                   | SA14-177 <sup>(24)</sup> | IgG1             | 3-48 | 4  | VRVGHPDTLFGVDY          | 15     | K           | 3-15  | 2     | QQYNNWPRYS  | 4         |                         |
|                   | SA14-179 <sup>(24)</sup> | IgM              | 3-48 | 4  | ARVGHPDTLFAVDH          | 13     | K           | 3-15  | 2     | QQYNNWPRYS  | 3         |                         |
|                   | SA14-180 <sup>(46)</sup> | IgM              | 3-74 | 4  | ARGSGNFGFDY             | 8      | L           | 1-40  | 3     | QSYDTSLSDYV | 5         |                         |
|                   | SA14-185 <sup>(24)</sup> | IgA1             | 3-48 | 4  | ESRTSRYPFWSGL           | 30     | K           | 3-15  | 2     | QQYNNWPRYS  | 8         |                         |
|                   | SA14-188                 | IgG1             | 3-9  | 4  | AKGIWSGESIAARPGFDY      | 2      | K           | 3-15  | 2     | QQYNNWYS    | 2         |                         |
|                   | SA15-101 <sup>(42)</sup> | IgG2             | 4-61 | 4  | ARVVAASPGDFYFDY         | 5      | L           | 1-47  | 1     | AAWDDSLSGYV | 0         |                         |
|                   | SA15-102                 | IgM              | 1-3  | 4  | ARPRREWLLYYFDY          | 2      | K           | 3-11  | 1     | QQRSNWPQT   | 2         |                         |
|                   | SA15-104 <sup>(43)</sup> | IgM              | 1-46 | 4  | ARGGLGSGSGSSEDKY        | 25     | K           | 1-27  | 1     | QKYNSAPWT   | 6         |                         |
|                   | SA15-105 <sup>(43)</sup> | IgM              | 1-46 | 4  | ARGGLGSGSGSSEDKY        | 25     | K           | 1-27  | 1     | KSITVPRGR   | 5         |                         |
|                   | SA15-108 <sup>(42)</sup> | IgM              | 4-61 | 4  | ARVVAATPGDYFDY          | 4      | L           | 1-47  | 1     | AAWDDSLSGYV | 0         |                         |
|                   | SA15-109 <sup>(43)</sup> | IgM              | 1-46 | 4  | ARGGLGSGSGSSEDKY        | 25     | K           | 1-27  | 1     | QKYNSAPWT   | 1         |                         |
|                   | SA15-110                 | IgM              | 1-69 | 4  | ARVGYYYDSSGYPSEYFFDY    | 1      | L           | 1-40  | 2     | QSYDSSLGHVV | 1         |                         |
|                   | SA15-113                 | IgG1             | 1-69 | 1  | ARNGSPYYYDNSGYYGVDEDFQH | 0      | L           | 1-40  | 2     | QSYDSSLGVS  | 1         |                         |
|                   | SA15-114 <sup>(46)</sup> | IgM              | 3-74 | 4  | VQGYGDYSGNY             | 0      | L           | 1-40  | 3     | QSYDSSLGWV  | 1         |                         |
|                   | SA15-115                 | IgM              | 5-51 | 6  | ARHVFRGGGYYGGMDV        | 0      | L           | 1-44  | 2     | AAWDDSLNGVV | 0         |                         |
|                   | SA15-117 <sup>(45)</sup> | IgA1             | 4-31 | 4  | ARDRGYTYGPFPLFDY        | 18     | L           | 2-14  | 3     | SSYTSTTTV   | 20        |                         |
|                   | SA15-118                 | IgG1             | 4-39 | 5  | ARLRGPLSPREDYRVWFDP     | 3      | L           | 3-21  | 2     | QVWDSSSGVV  | 0         |                         |
|                   | SA15-120 <sup>(45)</sup> | IgA1             | 4-31 | 4  | ARDRGYTYGPFPLLDY        | 20     | L           | 2-14  | 3     | SSYTSTSTV   | 15        |                         |
|                   | SA15-122                 | IgM              | 3-9  | 4  | AKDILAIPLFDT            | 13     | L           | 4-69  | 7     | QTWGTGLGV   | 13        |                         |
|                   | SA15-124 <sup>(44)</sup> | IgM              | 3-20 | 4  | TRGHGTHPRHYFDY          | 17     | K           | 3-20  | 3     | QQYGTSPLI   | 11        |                         |
|                   | SA15-125 <sup>(44)</sup> | IgM              | 3-20 | 4  | VRGHGHIHPRHYFDY         | 19     | K           | 3-20  | 3     | QQYGSSPLT   | 13        |                         |
|                   | SA15-183 <sup>(45)</sup> | IgA1             | 4-31 | 4  | ARDRGYTYGPFPLLDY        | 20     | L           | 2-14  | 3     | SSYTSTSTV   | 15        |                         |
|                   | SA15-190                 | IgM              | 4-4  | 5  | AYVAAAGLNWFDP           | 8      | K           | 1-39  | 2     | QSYNTPT     | 10        |                         |
|                   | SA15-192                 | IgM              | 4-61 | 4  | ARVVAATPGDYFDY          | 6      | K           | 3-15  | 1     | QQYKNWPRT   | 5         |                         |
|                   | SA15-193                 | IgM              | 1-18 | 4  | ARDPSNSSRLVYFDY         | 18     | K           | 3-11  | 2     | QQRSSRPCT   | 5         |                         |

(1) - (51) Identical superscript numbers indicate mAbs that belong to clonally expanded clones when isolated from the same donor, or mAbs that belong to a public clonotype when isolated from multiple donors of our cohort.

a-f Letters indicate criteria on which the respective mAb was selected for expression: a) clonally expanded mAbs with the donor, (b) mAbs of public clonotypes within our dataset, (c) mAbs of public clonotypes found both in our dataset and CoV-AbDab, (d) mAbs of VH3-53/3-66 genes, (e) mAbs of VH genes with strongest enrichment in our dataset (VH1-58, VH3-13, VH3-30, VH4-39) or (f) randomly selected mAbs of other VH genes and that appeared only once.

**Table S3. Sequences of antibodies strongly reactive<sup>a</sup> to RBD Beta**

| mAb expression ID | heavy chain variable sequence                                                                                                         | light chain variable sequence                                                                                         |
|-------------------|---------------------------------------------------------------------------------------------------------------------------------------|-----------------------------------------------------------------------------------------------------------------------|
| CS1 (VH3-30)      | QVQLVESGGGVVQPGRSLRLSCAASGFPFSTYGMHWVRQAPGKGLEW VAVISYDGSNKKYYADSVKGRFTISRDNKNTLYLQMNSLRAEDTAVYY CAKDFQYVAATHSPYYYGMDVWGQGTITVTVSS    | EIVLTQSPGTLSPGERATLSCRASQSVSSSYLACYQQKP GQAPRLLIYGASSRATGIPDRFSGSGSDFTLTISRLEPED FAVYYCQQYGSSPGVTFGGTKVDIK            |
| CS4 (VH3-30)      | QVQLVESGGGVVQPGRSLRLSCAASGFTFGSYGMHWVRQAPGKGLEW VAVISDDGSNKKYYADSVKGRFTISRDNKNTLYLQMNSLRAEDTAVYY CAKDFGTGTTLGYGMDVWGQGTITVTVSS        | QSVLTQPPSASGTPGQRVTISCSGSSSNIGNSYVYVYQQLP GTAPKLLIYRNNQRPSGVPDRFSGSKSGTASLAISGLRSE DEADY YCAA WDDSLSGWVFGGGTKLTVL     |
| CS8 (VH4-39)      | QLQLQESGPGLVKPKSETLSLTCTVSGGSISSSSYWGWRPQPGKGLECI GSIYYSGSTYYNPSLKSRTVISVDTSKNQFSLKLTSSVTAADTAVYYCAR HEGSTSPMLVKNYFDYWGQGLTVTVSS      | DIQMTQSPSSVSASVGDRTITCRASQGISSWLAWYQQKP GKAPKLLIYAASSLQSGVPSRFSGSGSDFTLTISLQPED FATYYCQQANSFPITFGGQTRLEIK             |
| CS12 (VH3-30)     | QVQLVESGGGVVQPGRSLRLSCAASGFTFSSYGMHWVRQAPGKGLEW VAVISYDGSNKKYYADSVKGRFTISRDNKNTLYLQMNSLRAEDTAVYY CAKSGAPAAMRGYYYGMDVWGQGTITVTVSS      | QTVVTQEPSTLTVSPGGTIVLTTCGSSSTGAVTSGHYPYWFQQ KPGQAPRTLIYDTSNKHSWTPARFSGSLLGGKAALTLSGA QPEDEADYCYLLSYSGAREVFGGGTKLTVL   |
| CS15 (VH3-30)     | QVQLVESGGGVVQPGRSLRLSCAASGFTFSSYGMHWVRQAPGKGLEW VAVISYDGSNKKYYADSVKGRFTISRDNKNTLYLQMNSLRAEDTAVYY CAKAPYAYCSSTSCYADYYYGMDVWGQGTITVTVSS | QSALTQPASVSGSPGQITISCTGSSDVGYYNYVSWYQQ HPGKAPKLMIEVSNRPSGVSNRFSGSKSGNTASLTISGLQ AEDEADYCYSSYSSSVVFGGGTKLTVL           |
| CS23 (VH3-53)     | EVQLVESGGGLVQPGGSLRLSCAASGFTVSSNYMNWVRQAPGKGLEW VSVIYSGGSTYYADSVKGRFTISRHNKNTLYLQMNSLRAEDTAVYYC ARGTAMAYGMDVWGQGTITVTVSS              | SYELTQPPSVSAPGQATARITCGGNNIGGQSVHWYQQKPG QAPLVVYDSDRPSGIPERFSGSNGTATLTISRVEAGD EADYCYQVWDSDDHVVFGGGTKLTVL             |
| CS24 (VH4-39)     | QLQLQESGPGLVKPKSETLSLTCTVSGGSISSSSYWGWRPQPGKLEWI GSIYYSGSTYYNPSLTSRVTVISVDTSKNQFSLKLTSSVTAADTAVYYCARQ FWTRPPSVWFDPPWGQGLTVTVSS        | QSVLTQPPSVSAAPGQKVTISCSGSSSNIGNNYVSWYQQL PRTAPKLLIYDNNRPSGIPDRFSGSKSGTASLATITGLQTG DEADYCYCGTWDSSLSAGVFGGGTKLTVL      |
| CS26 (VH3-15)     | EVQLVESGGGLVQPGGSLRLSCAASGFTFSSNWMWVRQAPGKGLEW VGRIRSKTDGGTDDYAAPVKGRFTISRDDSKNTLYLQMNSLKTEDTAV YYCTTDPNQPPRGYFYFGLDVGWQGTITVTVSS     | QTVVTQEPSTLTVSPGGTIVLTTCGSSSTGAVTSGHYPYWFQQ KPGQAPMTLICDTSNKHSWTPARFSGSLLGDKAALTLSGA QPEDEAEYCYLLSYSGAPVVFVFGGGTKLTVL |
| CS27 (VH4-39)     | QLQLQESGPGLVKPKSETLSLTCTVSGGSISSSSYWGWRPQPGKLEWI GSIYYSGSTYYNPSLKSRTVISVDTSKNQFSLKLTSSVTAADTAVYYCAR GIAARPGDWHFDLWGRGTLTVTVSS         | QSVLTQPPSVSAAPGQKVTISCSGSSSNIGNNYVSWYQQL PGTAPKLLIYDNNKRPSPGVPDRFSGSKSGTASLATITGLQT GDEADYCYCGTWDSSLSRGVFGGGTKLTVL    |
| CS29 (VH3-7)      | EVQLVESGGGLVQPGGSLRLSCAASRFTFSNYWMSWVRQAPGKGLEW VANIQRDQDSEKYYVDSVKGRTISRDNKNTLYLQMNSLRAEDTAVYY CARALSMVRGVIIPYFDYWGQGLTVTVSS         | NFMLTQPHSVSESPGKTVTISCTGSSGSIASNYVQWYQQR PGSAPTTVIYEDNQRPSPGVPDRFSGSIDSSNSASLTISGLK TEDEADYCYQSYDSSNHVVFVFGGGTKLTVL   |
| CS30 (VH4-39)     | QLQLQESGPGLVKPKSETLSLTCTVSGDSISSSSYWGWRPQPGKLEWI GSFYYSGSTYYNPSLKSRTVISVDTSKNQFSLKLTSSVTAADTAVYYCAR RGWLRGDFDLWGRGTLTVTVSS            | NFMLTQPHSVSESPGKTVTISCTGSSGSIASNYVQWYQQR PGSAPTTVIYEDNQRPSPGVPDRFSGSIDSSNSASLTISGLK TEDEADYCYQSYDSTNHVVFVFGGGTKLTVL   |
| CS31 (VH4-39)     | QLQLQESGPGLVKPKSETLSLTCTVSGGSISSSSYWGWRPQPGKLEWI GSFYYSGSTYYNPSLKSRTVISVDTSKNQFSLKLTSSVTAADTAVYYCAT QLWLRNFDSWGQGLTVTVSS              | NFMLTQPHSVSESPGKTVTISCTGSSGSIASNYVQWHQQR PGSAPTTVIYEDNQRPSPGVPDRFSGSIDSSNSASLTISGLK TEDEADYCYQSYDSGNVVFVFGGGTKLTVL    |
| CS34 (VH3-7)      | EVQLVESGGGLVQPGGSLRLSCAASGFTFSSYWMSWVRQAPGKGLEW VANIQRDQDSEKYYVDSVKGRTISRDNKNTLYLQMNSLRAEDTAVYY CARISQSTSWHDYWGQGLTVTVSS              | NFMLTQPHSVSESPGKTVTISCTRSSGSIASNYVQWYQQR PGSAPTTVIYEDNQRPSPGVPDRFSGSIDSSNSASLTISGLK TEDEADYCYQSYDNNHVFVFGGGTKLTVL     |
| CS37 (VH4-39)     | QLQLQESGPGLVKPKSETLSLTCTVSGGSISSSSYWGCIQPPGKGLECI GSIYYSGSTYYNPSLKSRTVISVDTSKNQFSLKLTSSVTAADTAVYYCARH VGPYSYDKNWFDPPWGQGLTVTVSS       | EIVLTQSPATLSPGERATLSCRASQSVSSYLAWYQQKP GQAPRLLIYDASNRATGIPARFSGSGSDFTLTISRLEPED FAVYYCQQRSNWPLTFGGGQKVEIK             |
| CS38 (VH3-13)     | EVQLVESGGGLVQPGGSLRLSCAASGFTFSSYDMHWVRQATGKGLEW VSAIGTAGDYYPGSVKGRFTISRDNKNTLYLQMNSLRAGDTAVYYC ARDLTQDWYFDLWGRGTLTVTVSS               | DIQMTQSPSSLSASVGDRTITCRASQSISSYLNWYQQKPG KAPKLLIYAASSLQSGVPSRFSGSGSDFTLTAISSLQPEDF ATYYCQQSYSTPITFGGQTRLEIK           |
| CS39 (VH3-15)     | EVQLVESGGGLVQPGGSLRLSCAASGFTFSSNWMWVRQAPGKGLEW VGRIRSKTDGGTDDYAAPVKGRFTISRDDSKNTLYLQMNSLKTEDTAV YYCTTDRKARNYYDSSGYEHDAFDIWGQGTMTVTVSS | DIQMTQSPSSLSASVGDRTITCRASQSISSFLNWYQQKPG KAPKLLIYAASSLQSGVPSRFSGSGSDFTLTISLQPEDF ATYYCQQSYSTLITFGGQTRLEIK             |
| CS40 (VH4-39)     | QLQLQESGPGLVKPKSETLSLTCTVSGGSISSSSYWGWRPQPGKLEWI GSIYYSGSTYYNPSLKSRTVISVDTSKNQFSLKLTSSVTAADTAVYYCAR HAAPRPGDSWFDPPWGQGLTVTVSS         | DIQMTQSPSSVSASVGDRTITCRASQAFSSWLAWYQQKP GKAPKLLIYAASSLQSGVPSRFSGSGSDFTLTISLQPED FATYYCQQANSFPITFGGQTRLEIK             |
| CS41 (VH4-39)     | QLQLQESGPGLVKPKSETLSLTCTVSGGSISSSSYWGWRPQPGKLECI GSIHYSGSTYYNPSLKSRTVISVDTSKNQFSLKLTSSVTAADTAVYYCAR HAGPYSSSWIANWFDPPWGQGLTVTVSS      | DIQMTQSPSSLSASVGDRTITCRASQGISSYLAWYQQKPG KAPKLLIYAASLTQSGVPSRFSGSGSDFTLTISLQPEDF ATYYCQQLNSYPLTFGGGQKVEIK             |
| CS42 (VH3-15)     | EVQLVESGGGLVQPGGSLRLSCAASGFTFSSNWMWVRQAPGKGLEW VGRIRSKTDGGTDDYAAPVKGRFTISRDDSKNTLYLQMNSLKTEDTAV YCTTDSLVDVGGGSYVNFYWGQGLTVTVSS        | DIQMTQSPSSLSASVGDRTITCRASQDISNYLNWYQQKP GKAPKLLIYDASNETGVPDRFSGSGSDFTFTISLQPED IATYYCQYDNLPLTFGGGQKVEIK               |
| CS43 (VH4-39)     | QLQLQESGPGLVKPKSETLSLTCTVSGGSISSSSYWGWRPQPGKLEWI GTIYYSGSTYYNPSLKSRTVISVDTSKNQFSLKLTSSVTAADTAVYYCAR RLGPRPFDNHGKHFYWGQGLTVTVSS        | DIQMTQSPSSLSASVGDRTITCRASQGISSYLAWYQQKPG KAPKLLIYAASLTQSGVPSRFSGSGSDFTLTISLQPED FATYYCQQLNSYPLTFGGGQKVEIK             |
| CS44 (VH1-58)     | QVQLVQSPEVKKPGTSSVKVCSKASGITFTSSAVQWVRQARGQRLEWI GWIVVGSNTNYAQKQERVITITRDMSTAYMELSSLRSEDATVYYC AAPYCSGGTCHDGFIDWQGTMTVTVSS            | EIVLTQSPGTLSPGERATLSCRASQSVSSSYLAWYQQKP GQAPRLLIYGASSRATGIPDRFSGSGSDFTLTISRLEPED FAVYYCQQYGSSPWFVFGGQKVEIK            |
| CS45 (VH4-39)     | QLQLQESGPGLVKPKSETLSLTCTVSGGSISSSSYWGWRPQPGKLEWI GSIYYSGSTYYNPSLKSRTVISVDTSKNQFSLKLTSSVTAADTAVYYCAR                                   | QSVLTQPPSVSAAPGQKVTISCSGSSSNIGNNYVSWYQQL PGTAPKLLIYDNNKRPSPGIPDRFSGSKSGTASLATITGLQT                                   |

| mAb expression ID  | heavy chain variable sequence                                                                                                               | light chain variable sequence                                                                                            |
|--------------------|---------------------------------------------------------------------------------------------------------------------------------------------|--------------------------------------------------------------------------------------------------------------------------|
|                    | QSSPKLGDDAFDIWGGQTMVTVSS                                                                                                                    | GDEADYYCGTWDSSLSVVFVGGGTKLTVL                                                                                            |
| CS46<br>(VH3-30)   | QVQLVESGGGVVQPGRSLRLSCAASGFPFSNYGMHWVRQAPGKGLEW<br>VAVISYDGSQYYADSVKGRFTISRDNKNTLYLQMNSLRGDDTA VYYC<br>CAKDRSVGATTSQYNYGYMDVWVGQGTITVTVSS   | QSVLTQPPSVSAAPGQKVTISCSGSSSNIGNNYVSWYQQF<br>PGTAPKLLIYDNDKRPSPGIPDRFSGSKSGTSATLGITGLQT<br>GDEADYYCGTWETLSAEVFGGGTRLTVL   |
| CS49<br>(VH3-53)   | EVQLVESGGGLIQPGGSLRLSCAASGFTVSSYMNWVRQPPGKGLEWV<br>SVIYNGGNAYYADSVKGRFTISRDNKNTLYLQMNSLRAEDTA VYYCA<br>RGLAVYGMDFWVGQGTITVTVSS              | NFMLTQPHSVSESPGKTVTISCTGSSGSIASNYVQWYQQR<br>PGSAPITVIYEDNQRPSGVPDRFSGSIDSSNSASLTISGLKT<br>EDEADYYCQSYDSSDLWVFGGGTKLTVL   |
| CS52<br>(VH7-4-1)  | QVQLVQSGSELKPKGASVKVCSKASGYSFTSHAMNWVRQAPGGLEW<br>MGWINTNTGNPTYAQGFTGRFVFLDTSVSTAYLQISSLKAEDTA VYYC<br>ARTSGWSGSPYGMDFWVGQGTITVTVSS         | QAVVTQEPSTLTVSPGGTIVTLTCASTGAVTSGYYPNWFQ<br>QKPGQAPRALIYISINKHSWTPARFSGSLGGKAALTLTG<br>VQPEDEAEYYCLLYFGGAQYVFGTGTKVTVL   |
| CS54<br>(VH3-53)   | EVQLVESGGGLVQPGGSLRLSCAASGFTVSSYMNWVRQAPGKGLEW<br>VSVIYSGGTFYADSVKGRFTISRHNKNTLYLQMNSLRAEDTA VYYCA<br>RDLAVYGMDFWVGQGTITVTVSS               | EIVLTQSPGTLTSLSPGERATLSCRASQSVSSSYLAWYQQIP<br>GQAPRLLIYGASSRATGIPDRFSGSGSGTDFTLTISRLEPED<br>FAVYYCQYDSSLITFGQGTTRLEIK    |
| CS56<br>(VH4-4)    | QVQLRSESGPLAKPSGTLTCAVSGGSITSIYVWVVRQPPGKGLEWI<br>GEIYHSGSTNYNPSLKSRTVTSVDKSKNQFSLKLSVTAADTA VYFCASA<br>PGTWFDFWVGQGTITVTVSS                | QSALTQPASVSGSPGQSITISCTGTSSDVGRYNYVSWYQQ<br>HPGKAPKLMIIYVSNRPSGVSNRFSGSKSGNTASLTISGL<br>QAEDEADYYCQSYTSSSTLYVFGTGTKVTVL  |
| CS59<br>(VH1-58)   | QVQLVQSGPEVKKPGTSSVKVCSKASGFTTSSAVQWVRQARGQRLEWI<br>GWIVVSGGNTNYAQSQRVITITRDLSTRTA YMELSSLRSEDTA VYYC<br>AAPYCSGGSCFADFMDWVGQGTITVTVSS      | EIVLTQSPGTLTSLSPGERATLSCRASQSVSSSYLAWYQQK<br>GQAPRLLIYGASSRATGIPDRFSGSGSGTDFTLTISRLEPED<br>FAVYYCQYDSSLITFGQGTTRLEIK     |
| CS65<br>(VH3-30)   | QVQLVESGGGVVQPGRSLRLSCAASGFTFGSYGMHWVRQAPGKGLEW<br>VAVISYDGSKYYADSVKGRFTISRDNKNTLYLQMNSLRAEDTA VYYC<br>CAKDLDIVLMVYAIRPGYYGMDFWVGQGTITVTVSS | QSALTQPASVSGSPGQSITISCTGTSSDVGGYNYVSWYQQ<br>HPGKAPKLMIIYVSKRPSGVSNRFSGSKSGNTASLTISGLQ<br>AEDEAAYYCSYSSSTLYVFGGQGTKVTVL   |
| CS74<br>(VH4-31)   | QVQLQESGPGLVKPSQTLTCTVSGDSISSGGYYWSWIRQHPGKGLE<br>WIGYIYSGSTYYPNPSLKSRTVTSVDTSNQFSLKLSVTAADTA VYFCA<br>RDYGGNQNYFGYWGQGTITVTVSS             | DIQMTQSPSSLASVGDRTVITCRASQSDITNSLNYQQK<br>GKAPKLLIYDANLETGVPSPFRFSGSGTDFTLTISLQPED<br>IATYYCQYDNLPLTFGGGKVEIK            |
| CS82<br>(VH3-53)   | EVQLVESGGGLIQPGGSLRLSCAASGFTVSSHYMSWVRQAPGKGLEWV<br>SVLYSGGSTYADSVKGRFTISRDNKNTLYLQMNSLRAEDTA VYYCA<br>RDLHSSGPFDAFDIWVGQGTITVTVSS          | DIQMTQSPSSLASVGDRTVITCRASQSDISNYLNYQQK<br>GKAPKLLIYDANLETGVPSPFRFSGSGTDFTLTISLQPE<br>DIATYYCQYDIDVGGGKVEIK               |
| CS84<br>(VH4-38-2) | QVQLVQSGAEVKKPQSTSLTCTVSGYSISSAYYWGWRQPPGKGLEWI<br>GSHFHSSTYYPNPSLKSRTVITVDTSKKQFSLKLSVTAADTA VYYCAR<br>DDYGDYAVSYWGQGTITVTVSS              | QSVLTQPPSVSGAPGKVTISCTGSSGSIASNYVQWYQQR<br>LPGTAPKLLIYGNRPSGVNDRFSGSKSGTSASLITGLQ<br>AEDEADYYCQSYDSSLSALYVFGTGTKVTVL     |
| CS85<br>(VH3-11)   | QVQLVESGGGLVQPGGSLRLSCAASGFTFSSYDMWVRQAPGKGLEWV<br>SYISSGSGTYADSVKGRFTISRDNKNTLYLQMNSLRAEDTA VYYCA<br>RELLLLGYCSGGSCYPVGPDPYWGQGTITVTVSS    | NFMLTQPHSVSESPGKTVTISCTGSSGSIASNYVQWYQQR<br>PGSAPITVIYEDNQRPSGVPDRFSGSIDSSNSASLTISGLK<br>TEDEADYYCQSYDSSNHWVFGGGTKLTVL   |
| CS87<br>(VH3-13)   | EVQLVESGGGLVQPGGSLRLSCAASGFTFSSYDMWVRQATGKGLEW<br>VSAIGTAGDTYYPGSKVGRFTISRRENAKNSLYLQMNSLRAGDTA VYYC<br>ARALYGSYSYQAGYVYGMDFWVGQGTITVTVSS   | DIQMTQSPSSLASVGDRTVITCRASQSISSYLNWYQQKPG<br>KAPKLLIYAASLQSGVPSRFSGSGSGTDFTLTISLQPEDF<br>ATYYCQSYRAFTFGGKVEIK             |
| CS88<br>(VH1-18)   | QVQLVQSGAEVKKPQSTSLTCTVSGYSISSAYYWGWRQAPGKGLEW<br>MGWISAYNGNTNYAQLKQGRVTMTDSTSTAYMELRSLRSDDTA VYY<br>YCARDYDYYWGSYPSACCYWGQGTITVTVSS        | QSALTQPASVSGSPGQSITISCTGTSSDVGGYNYVSWYQQ<br>HPGKAPKLMIIYVSNRPSGLSNRFSGSKSGNTASLTISGLQ<br>AEDEADYYCQSYTSSSTLYVFGGQGTKVTVL |
| CS89<br>(VH3-53)   | EVQLVESGGGLVQPGGSLRLSCAASGFTVSSYMNWVRQAPGKGLEWV<br>SLIYSGGSTYADSVKGRFTISRDNKNTLYLQMNSLRAEDTA VYYCAR<br>DLSVAGGMDVWVGQGTITVTVSS              | EIVLTQSPGTLTSLSPGERATLSCRASQSVSSSYLAWYQQK<br>GQAPRLLIYGASSRATGIPDRFSGSGSGTDFTLTIGRLEPED<br>FAVYYCQYDSSLPITFGQGTTRLEIK    |
| CS90<br>(VH3-13)   | EVQLVESGGGLVQPGGSLRLSCAASGFTFSSYDMWVRQGTGKGLEW<br>VSAIGTAGDTYYPGSKVGRFTISRRENAKNSLYLQMNSLRAGDTA VYYC<br>ARVPTMTKGFWDYFDLWGRGTLVTVSS         | DIQMTQSPSSLASVGDRTVITCRASQSISSFLNLYQQKPG<br>KAPNLLIYAASLQSGVPSRFSGSGSGTDFTLTISLQPEDF<br>ATYYCQSYNTLTFGQGTKVEIK           |
| CS91<br>(VH3-53)   | EVQLVESGGGLIQPGGSLRLSCAASGLTVSSYMNWVRQAPGKGLEW<br>ARWAGADGMDVWVGQGTITVTVSS                                                                  | EIVLTQSPGTLTSLSPGERATLSCRASQSVSSSYLAWYQQK<br>GQAPRLLIYGASSRATGIPDRFSGSGSGTDFTLTISRLEPED<br>FAVYYCQYDSSLPITFGQGTTRLEIK    |
| CS92<br>(VH3-23)   | EVQLVESGGGLVQPGGSLRLSCAASGFTFSSYAMSWVRQAPGKGLEW<br>VSVISGSDGSTYADSVKGRFTISRDNKNTLYLQMNSLRAEDTA VYYC<br>AKDFVVVAARSHDDYFDYWGQGTITVTVSS       | DIQMTQSPSSLASVGDRTVITCRASQSISSWLYQQKPG<br>GKAPKLLIYKASSLESVPSRFSGSGSGTEFTLTISLQPEDD<br>FATYYCQYKNFPLTFGGGKVEIK           |
| CS99<br>(VH1-69)   | QVQLVQSGAEVKKPQSSVKVCSKASGFTFSSYAISWVRQAPGQGLEW<br>MGIIPIFGTANYA QKFQGRVITADESTSTAYMELSSLRSEDTA VYYCA<br>TQGRFYCSGGSCYRYFDYWGQGTITVTVSS     | EIVLTQSPGTLTSLSPGERATLSCRASQSVSSSYLAWYQQK<br>GQAPRLLIYGASSRATGIPDRFSGSGSGTDFTLTISRLEPED<br>FAVYYCQYDSSLPITFGGKVEIK       |
| CS102<br>(VH1-58)  | QVQLVQSGPEVKKPGTSSVKVCSKASGFTFPSSAVQWVRQARGQRLEWI<br>GWIVVSGGNTNYA QKFQGRVITITRDLSTRTA YMELSSLRSEDTA VYYC<br>AAPHCGGGSCYDGFDFIWDGQGTITVTVSS | EIVLTQSPGTLTSLSPGERATLSCRASQSVSSSYLAWYQQK<br>GQAPRLLIYGASSRATGIPDRFSGSGSGTDFTLTISRLEPED<br>FAVYFCQYDSSLPITFGQGTTRLEIK    |
| CS103<br>(VH3-13)  | EVQLVESGGGLVQPGGSLRLSCAASGFTFSSYDMWVRQATGKGLEW<br>VSTIGTSGDTYYPGSKVGRFTISRRENAKNSLYLQMNSLRAGDTA VYYC<br>ARGGGDGYNLGLWYFDLWGRGTLVTVSS        | DIQMTQSPSSLASVGDRTVITCRASQSISSYLNWYQRKPG<br>KAPKLLIYAASLQSGVPSRFSGSGSGTDFTLTISLQPEDF<br>ATYYCQSYSNPPPTFGGKVEIK           |
| CS111<br>(VH3-64D) | EVQLVESGGGLVQPGGSLRLSCASGFTFSSYAMHWVRQAPGKGLEWV<br>SSISNGGSTYADSVKGRFTISRDNKNTLYLQMNSLRAEDTA VYYCV<br>KDVTVDTAMVTFIDNWVGQGTITVTVSS          | DIQMTQSPSSLASVGDRTVITCRASQSISSYLNWYQRKPG<br>KAPKLLIYAASLQSGVPSRFSGSGSGTDFTLTISLQPEDF<br>ATYYCQSYSTPTFGGKVEIK             |
| CS112<br>(VH3-15)  | EVQLVESGGGLVQPGGSLRLSCAASGFTFSSNAWMTWVRQAPGKGLEW<br>VGRISKTDGGTTDYAAPVGRFTISRDDSKNMLYLQMNSLKTEDTA V<br>YYCTDPGYTSPAYWGQGTITVTVSS            | DIQMTQSPSSLASVGDRTVITCRAGQSISSYLNWYQHKP<br>GKAPKLLIYAASLQSGVPSRFSGSGSGTDFTLTISLQPED<br>FATYYCQSYSTLTFGPGKVEIK            |

| mAb expression ID | heavy chain variable sequence                                                                                                           | light chain variable sequence                                                                                            |
|-------------------|-----------------------------------------------------------------------------------------------------------------------------------------|--------------------------------------------------------------------------------------------------------------------------|
| CS114 (VH1-69)    | QVQLVQSGAEVKKPGSSVKVCSKASGGTFFSSYGISWVRQAPGQGLEW<br>MGGIPIFGTAYYAQKFQGRVTITADESTSTAYMELSSLRSEDNAVYYCA<br>SSSPLLRFDWPHEAIFDYWGQGLTVTVSS  | EIVLTQSPATLSLSPGERATLSCRASQSVSSSYLAWYQQKP<br>GQAPRLLIYDASNRAATGIPARFSGSGSGTDFTLTISSLEPED<br>FAVYYCQQRSNWSGITFGGQTRLEIK   |
| CS115 (VH1-69)    | QVQLVQSGAEVKKPGSSVKVCSKASGGTFFSNYGFWSVRQAPGQGLEW<br>MGGTSPLFHTPNYVQKFQDRVTITADESTTSVYMELNSLSDDTAVYY<br>CACSSGRWGLVGNFYFDYWGQGLTVTVSS    | DIQMTQSPSSLSASVGDRTITTCQASQDITDYLNWYQQKP<br>GQAPKLLIYDASNLETGVPSRFSGSGSGTDFTLTISSLPED<br>IATYYCQQYANLLTFGGGKVEIK         |
| CS116 (VH3-30)    | QVQLVESGGGVVQPGRSLRLSCAASGFTFSSYGMHWVRQAPGKGLEW<br>VAVISYDGSNKKYADSVKGRFTISRDNKNTLYLQMNSLRAEDTAVYY<br>CAKGGDYDGLFFYGMVWVWGQGLTVTVSS     | DIVMTQSPPLSPVTPGEPASISCRSSQSLHSNGYNYLDWY<br>LQKPGQSPQLLIYLGNSNRASGVDPDRFSGSGSGTDFTLKISR<br>VEAEDVGVYYCMQALQRTLTFGGGKVEIK |
| CS117 (VH3-9)     | EVQLVESGGGLVQPGRSLRLSCAASGFTFDDYAMHWVRQAPGKGLEW<br>VVISYDGSNKKYADSVKGRFTISRDNKNTLYLQMNSLRAEDTAVYY<br>AKDAFGDPQGLYGMVWVWGQGLTVTVSS       | DIQMTQSPSSLSASVGDRTITTCRASQSITSYLNWYQQKP<br>GKAPKLLIYAASLQSGVPSRFSGSGSGTDFTLTISSLPED<br>FATYYCQQSYSTPLTFAQGTTRLEIK       |
| CS120 (VH3-30)    | QVQLVESGGGVVQPGRSLRLSCAASGFTFSSYGMHWVRQAPGKGLEW<br>VAVISYDGSNKKYADSVKGRFTISRDNKNTLYLQMNGLRAEDTAVYY<br>CAKLVGYSYCSGGSCYGGSPDYWGQGLTVTVSS | DIQMTQSPSSLSASVGDRTITTCQASQDISNYLNWYQQKP<br>GKAPKLLIYDASSLEAGVPSRFSGSGSGTDFTLTISSLPED<br>IATYYCQQYDNLPSFGGGKVEIK         |
| CS123 (VH4-59)    | QVQLQESGPGLVKPKSETLSLCTVSGGSISSYYWVSWIRQPPGKGLEWIA<br>YIYYSSTNYPNPKSRVTISVDTSKNQFSLKLSVTAADTAVYYCARS<br>RGYNYGLGLGWFDPWQGLTVTVSS        | DIQMTQSPSSLSASVGDRTITTCQASQDITNYLNWYQQKP<br>GKAPKLLIYDASNLERGVPSRFSGSGSGTDFTLTISSLQAE<br>DIATYYCQQYDDVPFTFGGKVEIK        |
| CS124 (VH4-39)    | QLQLQESGPGLVKPKSETLSLCTVSGGSISSYYWVSWIRQPPGKGLEWI<br>GSIHYSGSTIYYPNPKSRVTISVDTSKNQFSLKLSMATAADTAVYYCAR<br>HTGYYDSSGYRYLEYFQHWGQGLTVTVSS | DIQMTQSPSSLSASVGDRTITTCQASQDISNYLYWYQQKP<br>GKAPKLLIYDASNLETGVPSRFSGSGSGTDFTLTISSLPED<br>DIATYYCQQYDNLPLTFGGGKVEIK       |
| CS125 (VH1-18)    | QVQLVQSGAEVKKPGASVKVCSKASGYTFTSYGISWVRQAPGQGLEW<br>MGWISAYNGNTNYAQLKQGRVTMTDTSTAYMELSLRSDTAVYY<br>YCARDGTSHYDSSGYGADRNFDPWQGLTVTVSS     | QSVLTQPPSVSGAPGQRVTISCTGSSSNIGAGYDVHWYQQ<br>LPGTAPKLLIYGNSNRPSGVDPDRFSGSGSGTASLAITGLQ<br>AEDGADYYCQSYDSSLGWFVFGGKTLTVL   |
| CS127 (VH1-58)    | QVQLVQSGPEVKKPGTSSVKVCSKASGFTTSSAVQWVRQARGQRLEWI<br>GWIVVSGGNTNYAQKFQERVITITRDMSTSTAYMELSSLRSEDNAVYYC<br>AAPNCSGGSCYDAFDIWGQGLTVTVSS    | EIVLTQSPGTLTSLSPGERATLSCRASQSVSSSYLAWYQQKP<br>GQAPRLLIYGASSRATGIPDRFSGSGSGTDFTLTISSLEPED<br>FAVYYCQQYDNLPSFGGKVEIK       |
| CS129 (VH3-48)    | EVQLVESGGGLVQPGGSLRLSCAASGFTFSSYEMNWRQAPGKGLEW<br>VSYISSGGTIYADSVKGRFTISRDNKNTLYLQMNSLRAEDTAVYYC<br>ARQPREYDFTYSGYRRLFYFDYWGQGLTVTVSS   | DIQMTQSPSSLSASVGDRTITTCQASQDISNYLNWYQQKP<br>GKAPKLLIYDASNLETGVPSRFSGSGSGTDFTLTISSLPED<br>IATYYCQQYDNLPLTFGGGKVEIK        |
| CS131 (VH3-53)    | EVQLVETGGGLIQPGSLRLSCAASGFTVSSNYMSWVRQAPGKGLEWV<br>SVIYSGGTYADSVKGRFTISRDNKNTLYLQMNSLRAEDTAVYYCA<br>RWAQQLVPSENLKPYYYYGMDVWVWGQGLTVTVSS | EIVLTQSPGTLTSLSPGERATLSCRASQSVSSSYLAWYQQKP<br>GQAPRLLIYGASSRATGIPDRFSGSGSGTDFTLTISSLEPED<br>FAVYYCQQYDNLPSFGGKVEIK       |
| CS134 (VH3-23)    | EVQLVESGGGLVQPGGSLRLSCAASGFTFSSYAMSWVRQAPGKGLEW<br>VSAISGGSTIYADSVKGRFTISRDNKNTLYLQMNSLRAEDTAVYYC<br>AKGTQPIPDYGFDFDPWQGLTVTVSS         | EIVLTQSPGTLTSLSPGERATLSCRASQSVSSSYLAWYQQKP<br>GQAPRLLIYGASSRATGIPDRFSGSGSGTDFTLTISSLEPED<br>FAVYYCQQYDNLPSFGGKVEIK       |
| CS135 (VH3-30)    | QVQLVQSGPEVKKPGTSSVKVCSKASGFTFSSYGMHWVRQAPGKGLEW<br>VAVISYDGSNKKYADSVKGRFTISRDNKNTLYLQMNSLRAEDTAVYY<br>CAKGGGWYDYKGYFDYWGQGLTVTVSS      | DIQMTQSPSSLSASVGDRTITTCQASQDISNYLNWYQQKP<br>GKAPKLLIYDASNLETGVPSRFSGSGSGTDFTLTISSLPED<br>IATYYCQQYDNLPLTFGGQTRLEIK       |
| CS136 (VH3-48)    | EVQLVESGGGLVQPGGSLRLSCAASGFTFNNYEMNWRQAPGKGLEWI<br>SYISSGGTIVYADSVKGRFTISRDNKNTLYLQMNSLRAEDTAVYYC<br>RVGHPDITLFGVDYWGQGLTVTVSS          | EIVMTQSPATLSVSPGERATLSCRASQSVSSNLAWYQQKP<br>GQAPSLLIYGASTRATGIPARFSGSGSGTEFTLTISSLQSED<br>FAVYYCQQYNNWPRYSFGGQTKLEIK     |
| CS139 (VH3-48)    | EVQLVESGGGLVQPGGSLRLSCAASGFTFNNYEMNWRQAPGKGLEW<br>VSYISSGGTMYADSVKGRFTISRDNKNTLYLQMNSLRAEDTAVYYC<br>CARVGHDPDITLFGVEYWGQGLTVTVSS        | EIVMTQSPATLSVSPGERATLSCRASQSVSSNLAWYQHKPG<br>QAPRLLIYGASARATGIPARFSGSGSGTEFTLTISSLQSEDF<br>AVYYCQQYNNWPRYSFGGQTKLEIK     |
| CS143 (VH1-58)    | QVQLVQSGPEVKKPGTSSVKVCSKASGFTFSSAVQWVRQARGQRLEWI<br>GWIVVGSHTNTNYAQKFQERVITITRDMSTSTAYMELSSLTSEDNAVYYC<br>AAAIASAAPDYWGQGLTVTVSS        | EIVLTQSPATLSLSPGERATLSCRASQSVSSSYLAWYQQKP<br>GQAPRLLIYDASNRAATGIPARFSGSGSGTDFTLTISSLEPED<br>FAVYYCQQRSNWPPYTFGGQTKLEIK   |
| CS145 (VH1-46)    | QVQLVQSGAEVKKPGASVKVCSKASGYTFTSYMHVVRQAPGQGLE<br>WMGIHPNSGGTSTY A QKFQGRVTMTGDTSTSTVYMELSSLRSEDNAVY<br>YCARGGIVPAATLLFDPWQGLTVTVSS      | DIQMTQSPSTLSASVGDRTITTCRASQSISSWLAWYQQKP<br>GKAPKLLIYKASSLESVPSRFSGSGSGTEFTLTISSLPED<br>FATYYCQQYNSYSCSFGGQTKLEIK        |
| CS153 (VH1-58)    | QVQLVQSGPEVKKPGTSSVKVCSKASGFTTSSAVQWVRQARGQRLEWI<br>GWIVVSGGNTNYAQKFQERVITITRDMSTSTAYMELSSLRSEDNAVYYC<br>AAPYCSGSSCLDGFIDWQGLTVTVSS     | EIVLTQSPDTLSLSPGERATLSCRASQSVSSSYLAWYQQKP<br>GQAPRLLIYGASSRATGIPDRFSGSGSGTDFTLTISSLEPED<br>FAVYYCQQYDNLPSFGGKVEIK        |
| CS155 (VH3-23)    | EVQLVESGGGLVQPGGSLRLSCAASGFTFSSYAMSWVRQAPGKGLEW<br>VSAISGGNTIYADSVKGRFTISRDNKNTLYLQMNSLRAEDTAVYY<br>CAKDTYDIFPDVFDIWGQGLTVTVSS          | QSALTQPASVSGSPGQITISACAGTSSDLGGYVYVSWYQH<br>HPGKAPKLMIEVSNRPSGIPARFSGSGSGTDFTLTISSLQ<br>AEDEADYYCSSYSSSTLVPFGGTGKTVL     |
| CS156 (VH3-13)    | EVQLVESGGGLVQPGGSLRLSCAASGFTFSSYDMHWVRQATGKGLEW<br>VSAIGNAGDTIYPASVVKGRFTISRDNKNTLYLQMNSLRAGDTAVYYC<br>ARVRPTMTKGFWDYFDLWGRGTLTVTVSS    | DIQMTQSPSSLSASVGDRTITTCRASQSISTYLNWYQQKP<br>GKAPKLLIYAASLQSGVPSRFSGSGSGTDFTLTISSLPED<br>FATYYCQQSYNTLTFGGGKVEIK          |
| CS157 (VH3-13)    | EVQLVESGGGLVQPGGSLRLSCAASGFTFSSYDMHWVRQATGKGLEW<br>VSAIGTAGDTIYPGVSVKGRFTISRDNKNTLYLQMNSLRAGDTAVYYC<br>ARGHFYGLIGYMDVWVWGKGTTVTVSS      | DIQMTQSPSSLSASVGDRTITTCRASQSISYLNWYQQKL<br>GKAPKLLIYAASLQSGVPSRFSGSGSGTDFTLTISSLPED<br>FATYYCQQSYSTPPLTFGGGKVEIK         |
| CS158 (VH3-13)    | EVQLVESGGGLVQPGGSLRLSCAASGFTFSSYDMHWVRQATGKGLEW<br>VSAIGTAGDTIYPGVSVKGRFTISRDNKNTLYLQMNSLRAGDTAVYYC<br>ARAAAYDILTYRGMVWVWGKGTTVTVSS     | DIQMTQSPSSLSASVGDRTITTCRASQNISSYLNWYQQKP<br>GKAPKLLIYAASLQSGVPSRFSGSGSGTDFTLTISSLPED<br>FATYYCQQSYNIASFTFGGKVEIK         |
| CS161 (VH3-66)    | EVQLVESGGGLVQPGGSLRLSCAASGFTVSSNYMSWVRQAPGKGLEW<br>VSIYSGGTYADSVKGRFTISRDNKNTLYLQMNSLRAEDTAVYYC<br>ARDLAVYGMVWVWGQGLTVTVSS              | SYELTQPPSVVAPGQTRITCGGNIGNSVHWYQQKPG<br>QAPVLYVYDSDRPSGIPERFSGSGSGTDFTLTISSLEPED<br>EADYYCQVWDSDDHPVVFVGGGKTLTVL         |

| mAb expression ID | heavy chain variable sequence                                                                                                  | light chain variable sequence                                                                                     |
|-------------------|--------------------------------------------------------------------------------------------------------------------------------|-------------------------------------------------------------------------------------------------------------------|
| CS163<br>(VH4-39) | QLQLQESGPGLVKPSSETLSLTCTVSGGSISSSRYWGWRQPPGKGLEWIGSIYYSGSTYYNPSLKRVTISVDTSKNQFSLKLSVTAADTAVYYCARQVAWLPRDDYFDYWGQGLTVTVSS       | QSALTQPPSASGSPGQSVTISCTGTSSDVGIFYNYVSWYQQHPGKAPKLMIEVSKRPSGVPDRFSGSKSGNTASLTVSGLQAEDEADYCYSSYAGSNYYVVFVGGGKTLTVL  |
| CS165<br>(VH5-51) | EVQLVQSGAEVKKPGEELKISCKGSGYSFTSYWIGWVRQMPGKGLEWMGIYYPGDSDRYSPSFQGVTVISADKSISTAYLQWSSLKASDTAMYYCARHMSGTHSSGWYERWFDWPWGQGLTVTVSS | QSVLTQPPSASGTPGQRVTISCSGSSSNIGSNTVNWYQQLPGTAPKLLIYNNQRPSGVPDRFSGSKSGNTASLTVSGLRDEADYCAAWDDSLNPGVFGGGKTLTVL        |
| CS167<br>(VH4-39) | QLQLQESGPGLVKPSSETLSLTCTVSGGSISSSRYWGWRQPPGKGLEWIGSIYYSGSTYYNPSLKRVTISVDTSKNQFSLKLSVTAADTAVYYCARFTRFAGLYYFDYWGQGLTVTVSS        | QSALTQPPSASGSPGQSVTISCTGTSSDVGIFYNYVSWYQQHPGKAPKLLIYEVSKRPSGVPDRFSGSKSGNTASLTVSGLRADDEADYCYSSYAGTVLFGGGKTLTVL     |
| CS169<br>(VH3-33) | QVQLVESGGGVVQPRSLRLSCAASGFTFSTYGMHWVRQAPGKGLEWVAVIWDGSKNYADSVKGRFTISRDNKNTLYLQMKSLRAEDTAVYYCARDRFYDSSSGYSLDAFDIWDGQGMVTVSS     | QSVLTQPPSVSEAPRQRVTISCSGSSSNIGNNAVNWVQQLPGKAPKLLIYDILLPSGVSDRFSGSKSGTASLAIQLQSEDEADYCAAWDDSLNAWVFGGGKTLTVL        |
| CS170<br>(VH4-39) | QLQLQESGPGLVKPSSETLSLTCTVSGGSISSSRYWGWRQPPGKGLEWIGSIYYSGTYSNPSLKRVTISVDTSKNQFSLKLSVTAADTAVYYCARFVAPIKQWLVSYFDYWGQGLTVTVSS      | QSVLTQPPSVSGAPGQRVTISCTGSSSNIGAGYDVQWYQQLPGTAPKLLIYGNNSRPSGVPDRFSGSKSGTASLAIQLQAEDEADYCYQSYDSSLGVLFGGGKTLTVL      |
| CS171<br>(VH3-30) | QVQLVESGGGVVQPRSLRLSCAASGFTFSSNYGMHWVRQAPGKGLQWVAIISYDESSKYADSVKGRFTISRDNKNTLYLQMNLSRAEDTAMYYCARAKDPPQFAVAGTGYFDYWGQGLTVTVSS   | SYELTQPPSVSAPGQARITCGGNNIGSKNVHWYHQKPGQAPLVVYDSDRPSGIPERFSGSNGNTATLTISRVEAGDEADYCYQVWDSDDPWVFGGGKTLTVL            |
| CS172<br>(VH3-30) | QVQLVESGGGVVQPRSLRLSCAASGFTFSSNYGMHWVRQAPGKGLEWVAFISYDGGDKYYADSVKGRFTISRDNKNTLYLQMNLSRAEDTAVYFCAKAVYSYAYAVLYFDYWGQGLTVTVSS     | NFMLTQPHSVSESPGKTVTISCTGSSGFSASNSVQWYQQRPGSAPTMIYEDNHRPSGVPDRFSGSIDSSNSASLTIISGLKTEDEADYCYQSYDYNNHVVFVGGGKTLTVL   |
| CS173<br>(VH3-13) | EVQLVESGGGLVQPGGSLRLSCAASGFTFSSYDMHWVRQATGKGLEWVSAIGTAGDTYYPGSVKGRFTISRDNKNTLYLQMNLSRAEDTAVYYCARGGAVIPVWYFDLWGRGTLTVTVSS       | DIQMTQSPSSLSASVGDRTITCRASQSIGSYLNWYQQKPGKAPKLLIYAASLQSGVPSRFSGSGSDFTLTISSLQPEDFATYYCQQSYSHPGITFGPGTKVDIK          |
| CS175<br>(VH1-69) | QVQLVQSGAEVKKPGSSVKVCKASGFTFSRNASWVRQAPGQGLEWVGGHPIFGTAHYAQKFGQGRVITADESTSTAYMELSSLRSEDVAVYYCARREYSSTDWFDWPWGQTRVTVSS          | SYELTQPPSVSAPGQARITCGGNNIGSKSVHWYQQKPGQAPLVVYDSDRPSGIPERFSGSNGNTATLTISRVEAGDEADYCYQVWDSVSDHPGYVFGTGKTVTVL         |
| CS176<br>(VH3-66) | EVQLVESGGGLVQPGGSLRLSCAASGLIVSSNYMSWVRQAPGKGLEWVSVLYSGGTTYADSVKGRFTISRDNKNTLYLQMNLSRAEDTAVYYCARWGRVGTATGLAFDIWDGQGMVTVSS       | SYELTQPPSVSAPGQARITCGGNNIGSKSVHWYQQKPGQAPLVVYDSDRPSGIPERFSDNSNGNTATLTISRVEAGDEADYCYQVWDSDDHYYVFGTGKTVTVL          |
| CS179<br>(VH4-31) | QVQLQESGPGLVKPSQTLSTCTVSGGSISSGAIHWSWIRQHPGKGLEWIGYIYYSGGTYNPSLKSALTISVDTSKNHFLKLSVTAADTAVYYCARTTAPRPGSSWFDWPWGQGLTVTVSS       | QSVLTQPPSVSAAAPGQKVTISCSGSSSNIGNNYVSWYQQLPGTAPKLLIYDNNKRPSPGIPDRFSGSKSGTASLAIQLQTEDEADYCYCGTWDNTLSPGRGVFGGGKTLTVL |
| CS180<br>(VH1-58) | QVQLVQSGPEVKKPGTSSVKVCKASGFTFSRAVQWVRQARGQRLEWIGWIVVSGGNTNYAQKQFQERVITITRDMSTSAAYMELSSLRSEDVAVYYCAAPACSSSTRCYDGFDIWDGQGMVTVSS  | EIVLTQSPGTLSPGERATLSCRASQVSSSYLAWYQQKPGQAPSLLIYGASSRATGIPDRFSGSGSDFTLTIISRLPEDFAVYYCQQYGGSPWTFGQGTKEIK            |
| CS181<br>(VH1-18) | QVQLVQSGAEVKKPGASVKVSCRASGYTFTSYGITWVRQAPGQGLEWVGMWISVDNGNTKYAEKLRGRVTMTDTSTAYMELRSLGSDDTAVYYCARDGGWGTGIMGAINFDYWGQGLTVTVSS    | QSVLTQPPSASGTPGQRVTISCSGSSSNIGSNVYVWCQQLPGTAPKLLIYRNNQRPSGVPDRFSGSKSGTASLAIQLRSEDEADYCATWDDSLSGWVFGGGKTLTVL       |
| CS182<br>(VH3-53) | EVQLVETGGGLIQPGGSLRISCAASGLTVSSNYMNVWRQAPGKGLEWVSVIYSGGSTFYADSVKGRFTISRDNKNTLYLQMNLSRAEDTAVYYCARDLITYGMDVWGQGTVTVTVSS          | DIQLTQSPSFLSASVGDRTITCRASQGINSYLAWYQQKPGKAPNLLIYAASLQSGVPSRFSGSGSDEFTLTISSLQPEDFATYSCQHLTFGGGKKEIK                |

<sup>a</sup> Strong binding to RBD Beta was defined as detectable binding in an RBD Beta ELISA at 10 ng/ml.

**Table S4. X-ray data collection and refinement statistics**

| <b>Data collection</b>                                               |                                   |                                                |                                                |
|----------------------------------------------------------------------|-----------------------------------|------------------------------------------------|------------------------------------------------|
|                                                                      | CS23 + Beta RBD                   | CS44 + Beta RBD + COVA1-16                     | CV07-287 + wildtype RBD + COVA1-16             |
| Beamline                                                             | ALS 5.0.1                         | SSRL 12-1                                      | SSRL 12-1                                      |
| Wavelength (Å)                                                       | 0.97741                           | 0.97946                                        | 0.97946                                        |
| Space group                                                          | P 4 <sub>1</sub> 2 <sub>1</sub> 2 | P 2 <sub>1</sub> 2 <sub>1</sub> 2 <sub>1</sub> | P 2 <sub>1</sub> 2 <sub>1</sub> 2 <sub>1</sub> |
| Unit cell parameters                                                 |                                   |                                                |                                                |
| a, b, c (Å)                                                          | 145.9, 145.9, 112.0               | 89.6, 121.0, 138.0                             | 89.6, 121.5, 136.9                             |
| α, β, γ (°)                                                          | 90, 90, 90                        | 90, 90, 90                                     | 90, 90, 90                                     |
| Resolution (Å) <sup>a</sup>                                          | 50.0–2.86 (2.96–2.86)             | 50.0–2.89 (2.99–2.89)                          | 50.0–2.45 (2.54–2.45)                          |
| Unique reflections <sup>a</sup>                                      | 28,468 (2,764)                    | 34,085 (3,312)                                 | 55,558 (5,448)                                 |
| Redundancy <sup>a</sup>                                              | 24.5 (14.8)                       | 10.3 (7.5)                                     | 12.5 (6.6)                                     |
| Completeness (%) <sup>a</sup>                                        | 100.0 (99.5)                      | 98.9 (99.5)                                    | 99.9 (99.2)                                    |
| <I/σI> <sup>a</sup>                                                  | 9.2 (1.0)                         | 14.0 (1.8)                                     | 19.3 (1.1)                                     |
| R <sub>sym</sub> <sup>b</sup> (%) <sup>a</sup>                       | 25.6 (>100)                       | 16.9 (83.2)                                    | 11.5 (>100)                                    |
| R <sub>pim</sub> <sup>b</sup> (%) <sup>a</sup>                       | 5.2 (35.2)                        | 5.3 (31.0)                                     | 3.3 (48.0)                                     |
| CC <sub>1/2</sub> <sup>c</sup> (%) <sup>a</sup>                      | 98.2 (56.6)                       | 98.4 (78.6)                                    | 97.4 (49.6)                                    |
| <b>Refinement statistics</b>                                         |                                   |                                                |                                                |
| Resolution (Å)                                                       | 46.9–2.86                         | 40.6–2.89                                      | 40.5–2.45                                      |
| Reflections (work)                                                   | 28,466                            | 34,078                                         | 55,547                                         |
| Reflections (test)                                                   | 2,000                             | 1,687                                          | 2,728                                          |
| R <sub>cryst</sub> <sup>d</sup> / R <sub>free</sub> <sup>e</sup> (%) | 20.8/24.7                         | 21.6/25.7                                      | 20.7/23.8                                      |
| No. of atoms                                                         | 4,783                             | 8,323                                          | 8,512                                          |
| Macromolecules                                                       | 4,667                             | 8,196                                          | 8,191                                          |
| Ligands                                                              | 87                                | 89                                             | 96                                             |
| Solvent                                                              | 29                                | 38                                             | 225                                            |
| Average B-value (Å <sup>2</sup> )                                    | 53                                | 61                                             | 60                                             |
| Macromolecules                                                       | 52                                | 61                                             | 60                                             |
| Ligands                                                              | 80                                | 63                                             | 64                                             |
| Solvent                                                              | 34                                | 37                                             | 51                                             |
| Wilson B-value (Å <sup>2</sup> )                                     | 49                                | 57                                             | 51                                             |
| <b>RMSD from ideal geometry</b>                                      |                                   |                                                |                                                |
| Bond length (Å)                                                      | 0.003                             | 0.005                                          | 0.003                                          |
| Bond angle (°)                                                       | 0.54                              | 0.90                                           | 0.66                                           |
| <b>Ramachandran statistics<sup>f</sup></b>                           |                                   |                                                |                                                |
| Favored                                                              | 97.5                              | 97.0                                           | 96.6                                           |
| Outliers                                                             | 0.00                              | 0.19                                           | 0.00                                           |
| <b>PDB code</b>                                                      |                                   |                                                |                                                |
|                                                                      | 7S5P                              | 7S5Q                                           | 7S5R                                           |

<sup>a</sup> Numbers in parentheses refer to the highest resolution shell.

<sup>b</sup>  $R_{sym} = \sum_{hkl} \sum_i |I_{hkl,i} - \langle I_{hkl} \rangle| / \sum_{hkl} \sum_i I_{hkl,i}$  and  $R_{pim} = \sum_{hkl} (1/(n-1))^{1/2} \sum_i |I_{hkl,i} - \langle I_{hkl} \rangle| / \sum_{hkl} \sum_i I_{hkl,i}$ , where  $I_{hkl,i}$  is the scaled intensity of the  $i^{\text{th}}$  measurement of reflection  $h, k, l$ ,  $\langle I_{hkl} \rangle$  is the average intensity for that reflection, and  $n$  is the redundancy.

<sup>c</sup>  $CC_{1/2} = \text{Pearson correlation coefficient between two random half datasets.}$

<sup>d</sup>  $R_{cryst} = \sum_{hkl} |F_o - F_c| / \sum_{hkl} |F_o| \times 100$ , where  $F_o$  and  $F_c$  are the observed and calculated structure factors, respectively.

<sup>e</sup>  $R_{free}$  was calculated as for  $R_{cryst}$ , but on a test set comprising 5% of the data excluded from refinement.

<sup>f</sup> From MolProbity (45).

**Table S5. Hydrogen bonds and salt bridges identified at the antibody-RBD interface using the PISA program.**

| CS23                  | Dist. [Å] | RBD         | CS44                  | Dist. [Å] | RBD         | CV07-287              | Dist. [Å] | RBD         |
|-----------------------|-----------|-------------|-----------------------|-----------|-------------|-----------------------|-----------|-------------|
| <b>Hydrogen bonds</b> |           |             | <b>Hydrogen bonds</b> |           |             | <b>Hydrogen bonds</b> |           |             |
| H:THR28[N]            | 3.1       | ALA475[O]   | H:CYS100B[N]          | 2.7       | ALA475[O]   | H:CYS100B[N]          | 3.0       | ALA475[O]   |
| H:SER31[OG]           | 3.3       | ALA475[O]   | H:GLY53[O]            | 3.9       | GLN493[NE2] | H:THR100[O]           | 3.9       | TYR473[OH]  |
| H:ASN32[ND2]          | 3.2       | ALA475[O]   | H:SER54[O]            | 3.6       | GLN493[NE2] | H:ASN100A[OD1]        | 3.8       | SER477[N]   |
| H:TYR33[OH]           | 2.7       | LEU455[O]   | H:GLY100[O]           | 2.7       | TYR473[OH]  | H:ASP100D[OD1]        | 3.0       | SER477[N]   |
| H:SER53[N]            | 3.3       | TYR421[OH]  | H:HIS100C[O]          | 2.9       | ASN487[ND2] | H:ASP100D[OD2]        | 2.6       | SER477[OG]  |
| H:SER53[OG]           | 2.8       | ARG457[O]   | H:ASP100D[OD1]        | 3.0       | SER477[N]   | H:ASP100D[OD1]        | 3.5       | THR478[N]   |
| H:SER53[OG]           | 3.3       | LYS458[O]   | H:ASP100D[OD1]        | 3.4       | THR478[N]   | H:ASP100D[OD1]        | 3.3       | THR478[OG1] |
| H:SER53[OG]           | 2.9       | TYR473[OH]  | H:ASP100D[OD1]        | 3.3       | THR478[OG1] | H:TYR100C[O]          | 2.9       | ASN487[ND2] |
| H:GLY54[N]            | 2.9       | TYR421[OH]  | H:ASP100D[OD2]        | 2.5       | SER477[OG]  | H:SER54[O]            | 3.6       | GLN493[NE2] |
| H:SER56[OG]           | 2.6       | ASP420[OD2] | H:CYS100B[N]          | 2.7       | ALA475[O]   | H:CYS100B[N]          | 3.0       | ALA475[O]   |
| H:TYR58[OH]           | 3.5       | THR415[OG1] | H:GLY53[O]            | 3.9       | GLN493[NE2] | H:THR100[O]           | 3.9       | TYR473[OH]  |
| H:ARG94[NH1]          | 2.9       | ASN487[OD1] | H:SER54[O]            | 3.6       | GLN493[NE2] | H:ASN100A[OD1]        | 3.8       | SER477[N]   |
| H:TYR100[OH]          | 3.9       | GLN493[OE1] | H:GLY100[O]           | 2.7       | TYR473[OH]  | H:ASP100D[OD1]        | 3.0       | SER477[N]   |
| H:GLY26[O]            | 2.7       | ASN487[ND2] | H:HIS100C[O]          | 2.9       | ASN487[ND2] | H:ASP100D[OD2]        | 2.6       | SER477[OG]  |
| H:SER31[O]            | 2.8       | TYR473[OH]  | H:ASP100D[OD1]        | 3.0       | SER477[N]   | H:ASP100D[OD1]        | 3.5       | THR478[N]   |
| L:GLN31[NE2]          | 3.2       | TYR505[OH]  | H:ASP100D[OD1]        | 3.4       | THR478[N]   | H:ASP100D[OD1]        | 3.3       | THR478[OG1] |
| L:SER93[N]            | 3.5       | TYR505[OH]  | H:ASP100D[OD1]        | 3.3       | THR478[OG1] | H:TYR100C[O]          | 2.9       | ASN487[ND2] |
| L:SER93[OG]           | 3.1       | ASP405[OD2] | H:ASP100D[OD2]        | 2.5       | SER477[OG]  | H:SER54[O]            | 3.6       | GLN493[NE2] |
| L:ASP95A[OD1]         | 2.9       | ARG408[NH2] | H:CYS100B[N]          | 2.7       | ALA475[O]   | H:CYS100B[N]          | 3.0       | ALA475[O]   |
| L:SER93[O]            | 2.4       | ARG408[NH2] | L:TYR32[OH]           | 3.4       | PHE486[O]   | H:THR100[O]           | 3.9       | TYR473[OH]  |
| L:TRP91[O]            | 3.2       | TYR505[OH]  |                       |           |             | H:ASN100A[OD1]        | 3.8       | SER477[N]   |
| <b>Salt bridges</b>   |           |             |                       |           |             |                       |           |             |
| L:ASP95A[OD2]         | 3.9       | ARG408[NE]  |                       |           |             |                       |           |             |
| L:ASP95A[OD1]         | 2.9       | ARG408[NH2] |                       |           |             |                       |           |             |
| L:ASP95A[OD2]         | 3.5       | ARG408[NH2] |                       |           |             |                       |           |             |



**Table S6. Comparison of sequence features of Beta-elicited VH1-58 mAbs<sup>a</sup>.**

| mAb                        |         | Heavy Chain |        |     |                  | Light Chain |       |            |
|----------------------------|---------|-------------|--------|-----|------------------|-------------|-------|------------|
| ID                         | patient | VH          | DH     | JH  | CDR H3           | VK/VL       | JK/JL | CDR K3/L3  |
| <i>cross-reactive mAbs</i> |         |             |        |     |                  |             |       |            |
| CS44                       | SA5     | VH1-58      | DH2-15 | JH3 | AAPYCSGGTCHDGFDI | VK3-20      | JK1   | QQYGSSPWT  |
| CS59                       | SA4     | VH1-58      | DH2-15 | JH3 | S --F A M        | VK3-20      | JK3   | LF         |
| CS102                      | SA4     | VH1-58      | DH2-15 | JH3 | H G  S Y         | VK3-20      | JK1   |            |
| CS127                      | SA10    | VH1-58      | DH2-15 | JH3 | N    S Y A       | VK3-20      | JK1   |            |
| CS153                      | SA4     | VH1-58      | DH2-15 | JH3 | SS L             | VK3-20      | JK1   |            |
| CS180                      | SA2     | VH1-58      | DH2-2  | JH3 | A  STR Y         | VK3-20      | JK1   |            |
| <i>501Y-dependent mAbs</i> |         |             |        |     |                  |             |       |            |
| CS143                      | SA4     | VH1-58      | DH2-2  | JH4 | AAAIIASAAPY      | VK3-11      | JK2   | QQRSNWPPYT |

<sup>a</sup>All Beta-elicited VH1-58 mAbs expressed in this study are shown.

## References and Notes

1. W. Dejnirattisai, D. Zhou, P. Supasa, C. Liu, A. J. Mentzer, H. M. Ginn, Y. Zhao, H. M. E. Duyvesteyn, A. Tuekprakhon, R. Nutalai, B. Wang, C. López-Camacho, J. Slon-Campos, T. S. Walter, D. Skelly, S. A. Costa Clemens, F. G. Naveca, V. Nascimento, F. Nascimento, C. Fernandes da Costa, P. C. Resende, A. Pauvolid-Correa, M. M. Siqueira, C. Dold, R. Levin, T. Dong, A. J. Pollard, J. C. Knight, D. Crook, T. Lambe, E. Clutterbuck, S. Bibi, A. Flaxman, M. Bittaye, S. Belij-Rammerstorfer, S. C. Gilbert, M. W. Carroll, P. Klenerman, E. Barnes, S. J. Dunachie, N. G. Paterson, M. A. Williams, D. R. Hall, R. J. G. Hulswit, T. A. Bowden, E. E. Fry, J. Mongkolsapaya, J. Ren, D. I. Stuart, G. R. Screaton, Antibody evasion by the P.1 strain of SARS-CoV-2. *Cell* **184**, 2939–2954.e9 (2021). [doi:10.1016/j.cell.2021.03.055](https://doi.org/10.1016/j.cell.2021.03.055) [Medline](#)
2. P. Wang, M. S. Nair, L. Liu, S. Iketani, Y. Luo, Y. Guo, M. Wang, J. Yu, B. Zhang, P. D. Kwong, B. S. Graham, J. R. Mascola, J. Y. Chang, M. T. Yin, M. Sobieszczyk, C. A. Kyratsous, L. Shapiro, Z. Sheng, Y. Huang, D. D. Ho, Antibody resistance of SARS-CoV-2 variants B.1.351 and B.1.1.7. *Nature* **593**, 130–135 (2021). [doi:10.1038/s41586-021-03398-2](https://doi.org/10.1038/s41586-021-03398-2) [Medline](#)
3. M. Hoffmann, P. Arora, R. Groß, A. Seidel, B. F. Hörnich, A. S. Hahn, N. Krüger, L. Graichen, H. Hofmann-Winkler, A. Kempf, M. S. Winkler, S. Schulz, H.-M. Jäck, B. Jahrsdörfer, H. Schrezenmeier, M. Müller, A. Kleger, J. Münch, S. Pöhlmann, SARS-CoV-2 variants B.1.351 and P.1 escape from neutralizing antibodies. *Cell* **184**, 2384–2393.e12 (2021). [doi:10.1016/j.cell.2021.03.036](https://doi.org/10.1016/j.cell.2021.03.036) [Medline](#)
4. M. Hoffmann, H. Hofmann-Winkler, N. Krüger, A. Kempf, I. Nehlmeier, L. Graichen, P. Arora, A. Sidarovich, A.-S. Moldenhauer, M. S. Winkler, S. Schulz, H.-M. Jäck, M. V. Stankov, G. M. N. Behrens, S. Pöhlmann, SARS-CoV-2 variant B.1.617 is resistant to bamlanivimab and evades antibodies induced by infection and vaccination. *Cell Rep.* **36**, 109415 (2021). [doi:10.1016/j.celrep.2021.109415](https://doi.org/10.1016/j.celrep.2021.109415) [Medline](#)
5. D. Planas, T. Bruel, L. Grzelak, F. Guivel-Benhassine, I. Staropoli, F. Porrot, C. Planchais, J. Buchrieser, M. M. Rajah, E. Bishop, M. Albert, F. Donati, M. Prot, S. Behillil, V. Enouf, M. Maquart, M. Smati-Lafarge, E. Varon, F. Schortgen, L. Yahyaoui, M. Gonzalez, J. De Sèze, H. Péré, D. Veyer, A. Sève, E. Simon-Lorière, S. Fafi-Kremer, K. Stefic, H. Mouquet, L. Hocqueloux, S. van der Werf, T. Prazuck, O. Schwartz, Sensitivity of infectious SARS-CoV-2 B.1.1.7 and B.1.351 variants to neutralizing antibodies. *Nat. Med.* **27**, 917–924 (2021). [doi:10.1038/s41591-021-01318-5](https://doi.org/10.1038/s41591-021-01318-5) [Medline](#)
6. D. Zhou, W. Dejnirattisai, P. Supasa, C. Liu, A. J. Mentzer, H. M. Ginn, Y. Zhao, H. M. E. Duyvesteyn, A. Tuekprakhon, R. Nutalai, B. Wang, G. C. Paesen, C. Lopez-Camacho, J. Slon-Campos, B. Hallis, N. Coombes, K. Bewley, S. Charlton, T. S. Walter, D. Skelly, S. F. Lumley, C. Dold, R. Levin, T. Dong, A. J. Pollard, J. C. Knight, D. Crook, T. Lambe, E. Clutterbuck, S. Bibi, A. Flaxman, M. Bittaye, S. Belij-Rammerstorfer, S. Gilbert, W. James, M. W. Carroll, P. Klenerman, E. Barnes, S. J. Dunachie, E. E. Fry, J. Mongkolsapaya, J. Ren, D. I. Stuart, G. R. Screaton, Evidence of escape of SARS-CoV-2 variant B.1.351 from natural and vaccine-induced sera. *Cell* **184**, 2348–2361.e6 (2021). [doi:10.1016/j.cell.2021.02.037](https://doi.org/10.1016/j.cell.2021.02.037) [Medline](#)

7. M. Widera, A. Wilhelm, S. Hoehl, C. Pallas, N. Kohmer, T. Wolf, H. F. Rabenau, V. M. Corman, C. Drosten, M. J. G. T. Vehreschild, U. Goetsch, R. Gottschalk, S. Ciesek, Limited neutralization of authentic severe acute respiratory syndrome coronavirus 2 variants carrying E484K in vitro. *J. Infect. Dis.* **224**, 1109–1114 (2021).  
[doi:10.1093/infdis/jiab355](https://doi.org/10.1093/infdis/jiab355) [Medline](#)
8. M. Rapp, Y. Guo, E. R. Reddem, J. Yu, L. Liu, P. Wang, G. Cerutti, P. Katsamba, J. S. Bimela, F. A. Bahna, S. M. Manneppalli, B. Zhang, P. D. Kwong, Y. Huang, D. D. Ho, L. Shapiro, Z. Sheng, Modular basis for potent SARS-CoV-2 neutralization by a prevalent VH1-2-derived antibody class. *Cell Rep.* **35**, 108950 (2021).  
[doi:10.1016/j.celrep.2021.108950](https://doi.org/10.1016/j.celrep.2021.108950) [Medline](#)
9. M. Yuan, D. Huang, C. D. Lee, N. C. Wu, A. M. Jackson, X. Zhu, H. Liu, L. Peng, M. J. van Gils, R. W. Sanders, D. R. Burton, S. M. Reincke, H. Prüss, J. Kreye, D. Nemazee, A. B. Ward, I. A. Wilson, Structural and functional ramifications of antigenic drift in recent SARS-CoV-2 variants. *Science* **373**, 818–823 (2021). [doi:10.1126/science.abh1139](https://doi.org/10.1126/science.abh1139)  
[Medline](#)
10. C. O. Barnes, C. A. Jette, M. E. Abernathy, K. A. Dam, S. R. Esswein, H. B. Gristick, A. G. Malyutin, N. G. Sharaf, K. E. Huey-Tubman, Y. E. Lee, D. F. Robbiani, M. C. Nussenzweig, A. P. West Jr., P. J. Bjorkman, SARS-CoV-2 neutralizing antibody structures inform therapeutic strategies. *Nature* **588**, 682–687 (2020).  
[doi:10.1038/s41586-020-2852-1](https://doi.org/10.1038/s41586-020-2852-1) [Medline](#)
11. D. Geers, M. C. Shamier, S. Bogers, G. den Hartog, L. Gommers, N. N. Nieuwkoop, K. S. Schmitz, L. C. Rijsbergen, J. A. T. van Osch, E. Dijkhuizen, G. Smits, A. Comvalius, D. van Mourik, T. G. Caniels, M. J. van Gils, R. W. Sanders, B. B. Oude Munnink, R. Molenkamp, H. J. de Jager, B. L. Haagmans, R. L. de Swart, M. P. G. Koopmans, R. S. van Binnendijk, R. D. de Vries, C. H. GeurtsvanKessel, SARS-CoV-2 variants of concern partially escape humoral but not T cell responses in COVID-19 convalescent donors and vaccine recipients. *Sci. Immunol.* **6**, eabj1750 (2021).  
[doi:10.1126/sciimmunol.abj1750](https://doi.org/10.1126/sciimmunol.abj1750) [Medline](#)
12. C. Lucas, C. B. F. Vogels, I. Yildirim, J. E. Rothman, P. Lu, V. Monteiro, J. R. Gehlhausen, M. Campbell, J. Silva, A. Tabachnikova, M. A. Peña-Hernandez, M. C. Muenker, M. I. Breban, J. R. Fauver, S. Mohanty, J. Huang, A. C. Shaw, A. I. Ko, S. B. Omer, N. D. Grubaugh, A. Iwasaki, I. Ott, A. Watkins, C. Kalinich, T. Alpert, Yale SARS-CoV-2 Genomic Surveillance Initiative, Impact of circulating SARS-CoV-2 variants on mRNA vaccine-induced immunity. *Nature* **600**, 523–529 (2021). [doi:10.1038/s41586-021-04085-y](https://doi.org/10.1038/s41586-021-04085-y) [Medline](#)
13. M. Cevik, N. D. Grubaugh, A. Iwasaki, P. Openshaw, COVID-19 vaccines: Keeping pace with SARS-CoV-2 variants. *Cell* **184**, 5077–5081 (2021). [doi:10.1016/j.cell.2021.09.010](https://doi.org/10.1016/j.cell.2021.09.010)  
[Medline](#)
14. E. Cameroni, J. E. Bowen, L. E. Rosen, C. Saliba, S. K. Zepeda, K. Culap, D. Pinto, L. A. VanBlargan, A. De Marco, J. di Iulio, F. Zatta, H. Kaiser, J. Noack, N. Farhat, N. Czudnochowski, C. Havenar-Daughton, K. R. Sprouse, J. R. Dillen, A. E. Powell, A. Chen, C. Maher, L. Yin, D. Sun, L. Soriaga, J. Bassi, C. Silacci-Fregni, C. Gustafsson, N. M. Franko, J. Logue, N. T. Iqbal, I. Mazzitelli, J. Geffner, R. Grifantini, H. Chu, A. Gori,

- A. Riva, O. Giannini, A. Ceschi, P. Ferrari, P. E. Cippà, A. Franzetti-Pellanda, C. Garzoni, P. J. Halfmann, Y. Kawaoka, C. Hebner, L. A. Purcell, L. Piccoli, M. S. Pizzuto, A. C. Walls, M. S. Diamond, A. Telenti, H. W. Virgin, A. Lanzavecchia, G. Snell, D. Veessler, D. Corti, Broadly neutralizing antibodies overcome SARS-CoV-2 Omicron antigenic shift. *Nature* (2021). [10.1038/s41586-021-04386-2](https://doi.org/10.1038/s41586-021-04386-2) [Medline](#)
15. J. Kreye, N. K. Wenke, M. Chayka, J. Leubner, R. Murugan, N. Maier, B. Jurek, L.-T. Ly, D. Brandl, B. R. Rost, A. Stumpf, P. Schulz, H. Radbruch, A. E. Hauser, F. Pache, A. Meisel, L. Harms, F. Paul, U. Dirnagl, C. Garner, D. Schmitz, H. Wardemann, H. Prüss, Human cerebrospinal fluid monoclonal N-methyl-D-aspartate receptor autoantibodies are sufficient for encephalitis pathogenesis. *Brain* **139**, 2641–2652 (2016). [doi:10.1093/brain/aww208](https://doi.org/10.1093/brain/aww208) [Medline](#)
16. T. Tiller, E. Meffre, S. Yurasov, M. Tsuiji, M. C. Nussenzweig, H. Wardemann, Efficient generation of monoclonal antibodies from single human B cells by single cell RT-PCR and expression vector cloning. *J. Immunol. Methods* **329**, 112–124 (2008). [doi:10.1016/j.jim.2007.09.017](https://doi.org/10.1016/j.jim.2007.09.017) [Medline](#)
17. M. I. J. Raybould, A. Kovaltsuk, C. Marks, C. M. Deane, CoV-AbDab: The coronavirus antibody database. *Bioinformatics* **37**, 734–735 (2021). [doi:10.1093/bioinformatics/btaa739](https://doi.org/10.1093/bioinformatics/btaa739) [Medline](#)
18. C. Kreer, M. Zehner, T. Weber, M. S. Ercanoglu, L. Gieselmann, C. Rohde, S. Halwe, M. Korenkov, P. Schommers, K. Vanshylla, V. Di Cristanziano, H. Janicki, R. Brinker, A. Ashurov, V. Krähling, A. Kupke, H. Cohen-Dvashi, M. Koch, J. M. Eckert, S. Lederer, N. Pfeifer, T. Wolf, M. J. G. T. Vehreschild, C. Wendtner, R. Diskin, H. Gruell, S. Becker, F. Klein, Longitudinal isolation of potent near-germline SARS-CoV-2-neutralizing antibodies from COVID-19 patients. *Cell* **182**, 1663–1673 (2020). [doi:10.1016/j.cell.2020.08.046](https://doi.org/10.1016/j.cell.2020.08.046) [Medline](#)
19. J. Kreye, S. M. Reincke, H.-C. Kornau, E. Sánchez-Sendin, V. M. Corman, H. Liu, M. Yuan, N. C. Wu, X. Zhu, C. D. Lee, J. Timpert, M. Höltje, K. Dietert, L. Stöffler, N. von Wardenburg, S. van Hoof, M. A. Homeyer, J. Hoffmann, A. Abdelgawad, A. D. Gruber, L. D. Bertzbach, D. Vladimirova, L. Y. Li, P. C. Barthel, K. Skriner, A. C. Hocke, S. Hippenstiel, M. Witzernath, N. Suttorp, F. Kurth, C. Franke, M. Endres, D. Schmitz, L. M. Jeworowski, A. Richter, M. L. Schmidt, T. Schwarz, M. A. Müller, C. Drosten, D. Wendisch, L. E. Sander, N. Osterrieder, I. A. Wilson, H. Prüss, A therapeutic non-self-reactive SARS-CoV-2 antibody protects from lung pathology in a COVID-19 hamster model. *Cell* **183**, 1058–1069.e19 (2020). [doi:10.1016/j.cell.2020.09.049](https://doi.org/10.1016/j.cell.2020.09.049) [Medline](#)
20. D. F. Robbiani, C. Gaebler, F. Muecksch, J. C. C. Lorenzi, Z. Wang, A. Cho, M. Agudelo, C. O. Barnes, A. Gazumyan, S. Finkin, T. Hägglöf, T. Y. Oliveira, C. Viant, A. Hurley, H.-H. Hoffmann, K. G. Millard, R. G. Kost, M. Cipolla, K. Gordon, F. Bianchini, S. T. Chen, V. Ramos, R. Patel, J. Dizon, I. Shimeliovich, P. Mendoza, H. Hartweger, L. Nogueira, M. Pack, J. Horowitz, F. Schmidt, Y. Weisblum, E. Michailidis, A. W. Ashbrook, E. Waltari, J. E. Pak, K. E. Huey-Tubman, N. Koranda, P. R. Hoffman, A. P. West Jr., C. M. Rice, T. Hatziioannou, P. J. Bjorkman, P. D. Bieniasz, M. Caskey, M. C. Nussenzweig, Convergent antibody responses to SARS-CoV-2 in convalescent individuals. *Nature* **584**, 437–442 (2020). [doi:10.1038/s41586-020-2456-9](https://doi.org/10.1038/s41586-020-2456-9) [Medline](#)

21. Z. Wang, F. Schmidt, Y. Weisblum, F. Muecksch, C. O. Barnes, S. Finkin, D. Schaefer-Babajew, M. Cipolla, C. Gaebler, J. A. Lieberman, T. Y. Oliveira, Z. Yang, M. E. Abernathy, K. E. Huey-Tubman, A. Hurley, M. Turroja, K. A. West, K. Gordon, K. G. Millard, V. Ramos, J. Da Silva, J. Xu, R. A. Colbert, R. Patel, J. Dizon, C. Unson-O'Brien, I. Shimeliovich, A. Gazumyan, M. Caskey, P. J. Bjorkman, R. Casellas, T. Hatzioannou, P. D. Bieniasz, M. C. Nussenzweig, mRNA vaccine-elicited antibodies to SARS-CoV-2 and circulating variants. *Nature* **592**, 616–622 (2021). [doi:10.1038/s41586-021-03324-6](https://doi.org/10.1038/s41586-021-03324-6) [Medline](#)
22. C. O. Barnes, A. P. West Jr., K. E. Huey-Tubman, M. A. G. Hoffmann, N. G. Sharaf, P. R. Hoffman, N. Koranda, H. B. Gristick, C. Gaebler, F. Muecksch, J. C. C. Lorenzi, S. Finkin, T. Häggglöf, A. Hurley, K. G. Millard, Y. Weisblum, F. Schmidt, T. Hatzioannou, P. D. Bieniasz, M. Caskey, D. F. Robbiani, M. C. Nussenzweig, P. J. Bjorkman, Structures of human antibodies bound to SARS-CoV-2 spike reveal common epitopes and recurrent features of antibodies. *Cell* **182**, 828–842.e16 (2020). [doi:10.1016/j.cell.2020.06.025](https://doi.org/10.1016/j.cell.2020.06.025) [Medline](#)
23. N. C. Wu, M. Yuan, H. Liu, C. D. Lee, X. Zhu, S. Bangaru, J. L. Torres, T. G. Caniels, P. J. M. Brouwer, M. J. van Gils, R. W. Sanders, A. B. Ward, I. A. Wilson, An alternative binding mode of IGHV3-53 antibodies to the SARS-CoV-2 receptor binding domain. *Cell Rep.* **33**, 108274 (2020). [doi:10.1016/j.celrep.2020.108274](https://doi.org/10.1016/j.celrep.2020.108274) [Medline](#)
24. M. Yuan, H. Liu, N. C. Wu, C. D. Lee, X. Zhu, F. Zhao, D. Huang, W. Yu, Y. Hua, H. Tien, T. F. Rogers, E. Landais, D. Sok, J. G. Jardine, D. R. Burton, I. A. Wilson, Structural basis of a shared antibody response to SARS-CoV-2. *Science* **369**, 1119–1123 (2020). [doi:10.1126/science.abd2321](https://doi.org/10.1126/science.abd2321) [Medline](#)
25. M. Yuan, H. Liu, N. C. Wu, I. A. Wilson, Recognition of the SARS-CoV-2 receptor binding domain by neutralizing antibodies. *Biochem. Biophys. Res. Commun.* **538**, 192–203 (2021). [doi:10.1016/j.bbrc.2020.10.012](https://doi.org/10.1016/j.bbrc.2020.10.012) [Medline](#)
26. L. Wang, T. Zhou, Y. Zhang, E. S. Yang, C. A. Schramm, W. Shi, A. Pegu, O. K. Oloniniyi, A. R. Henry, S. Darko, S. R. Narpala, C. Hatcher, D. R. Martinez, Y. Tsybovsky, E. Phung, O. M. Abiona, A. Antia, E. M. Cale, L. A. Chang, M. Choe, K. S. Corbett, R. L. Davis, A. T. DiPiazza, I. J. Gordon, S. H. Hait, T. Hermanus, P. Kgagudi, F. Laboune, K. Leung, T. Liu, R. D. Mason, A. F. Nazzari, L. Novik, S. O'Connell, S. O'Dell, A. S. Olia, S. D. Schmidt, T. Stephens, C. D. Stringham, C. A. Talana, I.-T. Teng, D. A. Wagner, A. T. Widge, B. Zhang, M. Roederer, J. E. Ledgerwood, T. J. Ruckwardt, M. R. Gaudinski, P. L. Moore, N. A. Doria-Rose, R. S. Baric, B. S. Graham, A. B. McDermott, D. C. Douek, P. D. Kwong, J. R. Mascola, N. J. Sullivan, J. Misasi, Ultrapotent antibodies against diverse and highly transmissible SARS-CoV-2 variants. *Science* **373**, eabh1766 (2021). [doi:10.1126/science.abh1766](https://doi.org/10.1126/science.abh1766) [Medline](#)
27. W. Dejnirattisai, D. Zhou, H. M. Ginn, H. M. E. Duyvesteyn, P. Supasa, J. B. Case, Y. Zhao, T. S. Walter, A. J. Mentzer, C. Liu, B. Wang, G. C. Paesen, J. Slon-Campos, C. López-Camacho, N. M. Kafai, A. L. Bailey, R. E. Chen, B. Ying, C. Thompson, J. Bolton, A. Fyfe, S. Gupta, T. K. Tan, J. Gilbert-Jaramillo, W. James, M. Knight, M. W. Carroll, D. Skelly, C. Dold, Y. Peng, R. Levin, T. Dong, A. J. Pollard, J. C. Knight, P. Klenerman, N. Temperton, D. R. Hall, M. A. Williams, N. G. Paterson, F. K. R. Bertram, C. A. Siebert, D. K. Clare, A. Howe, J. Radecke, Y. Song, A. R. Townsend, K. A. Huang, E. E.

- Fry, J. Mongkolsapaya, M. S. Diamond, J. Ren, D. I. Stuart, G. R. Screaton, The antigenic anatomy of SARS-CoV-2 receptor binding domain. *Cell* **184**, 2183–2200.e22 (2021). [doi:10.1016/j.cell.2021.02.032](https://doi.org/10.1016/j.cell.2021.02.032) [Medline](#)
28. M. A. Tortorici, M. Beltramello, F. A. Lempp, D. Pinto, H. V. Dang, L. E. Rosen, M. McCallum, J. Bowen, A. Minola, S. Jaconi, F. Zatta, A. De Marco, B. Guarino, S. Bianchi, E. J. Lauron, H. Tucker, J. Zhou, A. Peter, C. Havenar-Daughton, J. A. Wojcechowskyj, J. B. Case, R. E. Chen, H. Kaiser, M. Montiel-Ruiz, M. Meury, N. Czudnochowski, R. Spreafico, J. Dillen, C. Ng, N. Sprugasci, K. Culap, F. Benigni, R. Abdelnabi, S. C. Foo, M. A. Schmid, E. Cameroni, A. Riva, A. Gabrieli, M. Galli, M. S. Pizzuto, J. Neyts, M. S. Diamond, H. W. Virgin, G. Snell, D. Corti, K. Fink, D. Veessler, Ultrapotent human antibodies protect against SARS-CoV-2 challenge via multiple mechanisms. *Science* **370**, 950–957 (2020). [doi:10.1126/science.abe3354](https://doi.org/10.1126/science.abe3354) [Medline](#)
29. A. J. Spencer *et al.*, The ChAdOx1 vectored vaccine, AZD2816, induces strong immunogenicity against SARS-CoV-2 Beta (B.1.351) and other variants of concern in preclinical studies. *bioRxiv*, 2021.06.08.447308 (2021).
30. B. Ying, B. Whitener, L. A. VanBlargan, A. O. Hassan, S. Shrihari, C. Y. Liang, C. E. Karl, S. Mackin, R. E. Chen, N. M. Kafai, S. H. Wilks, D. J. Smith, J. M. Carreño, G. Singh, F. Krammer, A. Carfi, S. M. Elbashir, D. K. Edwards, L. B. Thackray, M. S. Diamond, Protective activity of mRNA vaccines against ancestral and variant SARS-CoV-2 strains. *Sci. Transl. Med.* eabm3302 (2021). [10.1126/scitranslmed.abm3302](https://doi.org/10.1126/scitranslmed.abm3302) [Medline](#)
31. S. D. Boyd, B. A. Gaëta, K. J. Jackson, A. Z. Fire, E. L. Marshall, J. D. Merker, J. M. Maniar, L. N. Zhang, B. Sahaf, C. D. Jones, B. B. Simen, B. Hanczaruk, K. D. Nguyen, K. C. Nadeau, M. Egholm, D. B. Miklos, J. L. Zehnder, A. M. Collins, Individual variation in the germline Ig gene repertoire inferred from variable region gene rearrangements. *J. Immunol.* **184**, 6986–6992 (2010). [doi:10.4049/jimmunol.1000445](https://doi.org/10.4049/jimmunol.1000445) [Medline](#)
32. S. M. Reincke, H. Prüss, J. Kreye, Brain antibody sequence evaluation (BASE): An easy-to-use software for complete data analysis in single cell immunoglobulin cloning. *BMC Bioinformatics* **21**, 446 (2020). [doi:10.1186/s12859-020-03741-w](https://doi.org/10.1186/s12859-020-03741-w) [Medline](#)
33. Z. Gu, L. Gu, R. Eils, M. Schlesner, B. Brors, circlize Implements and enhances circular visualization in R. *Bioinformatics* **30**, 2811–2812 (2014). [doi:10.1093/bioinformatics/btu393](https://doi.org/10.1093/bioinformatics/btu393) [Medline](#)
34. D. Hillus, T. Schwarz, P. Tober-Lau, K. Vanshylla, H. Hastor, C. Thibeault, S. Jentsch, E. T. Helbig, L. J. Lippert, P. Tscheak, M. L. Schmidt, J. Riege, A. Solarek, C. von Kalle, C. Dang-Heine, H. Gruell, P. Kopankiewicz, N. Suttorp, C. Drosten, H. Bias, J. Seybold, F. Klein, F. Kurth, V. M. Corman, L. E. Sander, EICOV/COVIM Study Group, Safety, reactogenicity, and immunogenicity of homologous and heterologous prime-boost immunisation with ChAdOx1 nCoV-19 and BNT162b2: A prospective cohort study. *Lancet Respir. Med.* **9**, 1255–1265 (2021). [doi:10.1016/S2213-2600\(21\)00357-X](https://doi.org/10.1016/S2213-2600(21)00357-X) [Medline](#)
35. W. T. Harvey, A. M. Carabelli, B. Jackson, R. K. Gupta, E. C. Thomson, E. M. Harrison, C. Ludden, R. Reeve, A. Rambaut, S. J. Peacock, D. L. Robertson; COVID-19 Genomics



- UK (COG-UK) Consortium, SARS-CoV-2 variants, spike mutations and immune escape. *Nat. Rev. Microbiol.* **19**, 409–424 (2021). [doi:10.1038/s41579-021-00573-0](https://doi.org/10.1038/s41579-021-00573-0) [Medline](#)
36. S. P. Otto, T. Day, J. Arino, C. Colijn, J. Dushoff, M. Li, S. Mechai, G. Van Domselaar, J. Wu, D. J. D. Earn, N. H. Ogden, The origins and potential future of SARS-CoV-2 variants of concern in the evolving COVID-19 pandemic. *Curr. Biol.* **31**, R918–R929 (2021). [doi:10.1016/j.cub.2021.06.049](https://doi.org/10.1016/j.cub.2021.06.049) [Medline](#)
37. R. Wölfel, V. M. Corman, W. Guggemos, M. Seilmaier, S. Zange, M. A. Müller, D. Niemeyer, T. C. Jones, P. Vollmar, C. Rothe, M. Hoelscher, T. Bleicker, S. Brünink, J. Schneider, R. Ehmann, K. Zwirgmaier, C. Drosten, C. Wendtner, Virological assessment of hospitalized patients with COVID-2019. *Nature* **581**, 465–469 (2020). [doi:10.1038/s41586-020-2196-x](https://doi.org/10.1038/s41586-020-2196-x) [Medline](#)
38. D. C. Ekiert, R. H. E. Friesen, G. Bhabha, T. Kwaks, M. Jongeneelen, W. Yu, C. Ophorst, F. Cox, H. J. W. M. Korse, B. Brandenburg, R. Vogels, J. P. J. Brakenhoff, R. Kompier, M. H. Koldijk, L. A. H. M. Cornelissen, L. L. M. Poon, M. Peiris, W. Koudstaal, I. A. Wilson, J. Goudsmit, A highly conserved neutralizing epitope on group 2 influenza A viruses. *Science* **333**, 843–850 (2011). [doi:10.1126/science.1204839](https://doi.org/10.1126/science.1204839) [Medline](#)
39. H. Liu, M. Yuan, D. Huang, S. Bangaru, F. Zhao, C. D. Lee, L. Peng, S. Barman, X. Zhu, D. Nemazee, D. R. Burton, M. J. van Gils, R. W. Sanders, H.-C. Kornau, S. M. Reincke, H. Prüss, J. Kreye, N. C. Wu, A. B. Ward, I. A. Wilson, A combination of cross-neutralizing antibodies synergizes to prevent SARS-CoV-2 and SARS-CoV pseudovirus infection. *Cell Host Microbe* **29**, 806–818.e6 (2021). [doi:10.1016/j.chom.2021.04.005](https://doi.org/10.1016/j.chom.2021.04.005) [Medline](#)
40. Z. Otwinowski, W. Minor, Processing of X-ray diffraction data collected in oscillation mode. *Methods Enzymol.* **276**, 307–326 (1997). [doi:10.1016/S0076-6879\(97\)76066-X](https://doi.org/10.1016/S0076-6879(97)76066-X)
41. A. J. McCoy, R. W. Grosse-Kunstleve, P. D. Adams, M. D. Winn, L. C. Storoni, R. J. Read, Phaser crystallographic software. *J. Appl. Crystallogr.* **40**, 658–674 (2007). [doi:10.1107/S0021889807021206](https://doi.org/10.1107/S0021889807021206) [Medline](#)
42. P. Emsley, B. Lohkamp, W. G. Scott, K. Cowtan, Features and development of Coot. *Acta Crystallogr. D Biol. Crystallogr.* **66**, 486–501 (2010). [doi:10.1107/S0907444910007493](https://doi.org/10.1107/S0907444910007493) [Medline](#)
43. P. D. Adams, P. V. Afonine, G. Bunkóczi, V. B. Chen, I. W. Davis, N. Echols, J. J. Headd, L.-W. Hung, G. J. Kapral, R. W. Grosse-Kunstleve, A. J. McCoy, N. W. Moriarty, R. Oeffner, R. J. Read, D. C. Richardson, J. S. Richardson, T. C. Terwilliger, P. H. Zwart, PHENIX: A comprehensive Python-based system for macromolecular structure solution. *Acta Crystallogr. D Biol. Crystallogr.* **66**, 213–221 (2010). [doi:10.1107/S0907444909052925](https://doi.org/10.1107/S0907444909052925) [Medline](#)
44. E. Krissinel, K. Henrick, Inference of macromolecular assemblies from crystalline state. *J. Mol. Biol.* **372**, 774–797 (2007). [doi:10.1016/j.jmb.2007.05.022](https://doi.org/10.1016/j.jmb.2007.05.022) [Medline](#)
45. V. B. Chen, W. B. Arendall 3rd, J. J. Headd, D. A. Keedy, R. M. Immormino, G. J. Kapral, L. W. Murray, J. S. Richardson, D. C. Richardson, MolProbity: All-atom structure validation for macromolecular crystallography. *Acta Crystallogr. D Biol. Crystallogr.* **66**, 12–21 (2010). [doi:10.1107/S0907444909042073](https://doi.org/10.1107/S0907444909042073) [Medline](#)
